# Supplementary material for: Iron deficiency anemia among children aged 2–5 years in southern Ethiopia: a community-based cross-sectional study
Source: PeerJ journal article supplement (doi:10.7717/peerj.11649), 2021-06-28
Supplement: Questionnaire_translated_Appendix_S8.pdf [file Questionnaire_translated_Appendix_S8.pdf]

**Household code** **Anemia survey**  
**SURVEY QUESTIONNAIRE - IRON DEFICIENCY ANEMIA AMONG CHILDREN 2-5 YEARS OLD IN ETHIOPIA**

*DATE OF INTERVIEW* /\_\_/\_/Day /\_\_/\_/Month /\_\_/\_//\_\_/\_/Year

*TIME STARTED* /\_/\_/Hour /\_/\_/Minutes

*TIME ENDED* /\_/\_/Hour /\_/\_/Minutes

**INTERVIEWER NAME** \_\_\_\_\_

**SUPERVISOR NAME** \_\_\_\_\_

**CHECKED BY** \_\_\_\_\_

**ENTERED BY** \_\_\_\_\_

**LOCALITY NAME** \_\_\_\_\_

**VILLAGE NAME** \_\_\_\_\_

**NAME OF HOUSEHOLD HEAD** \_\_\_\_\_

**NAME OF MOTHER** \_\_\_\_\_

**NAME OF CHILD** \_\_\_\_\_

**HOUSEHOLD IDENTITY NUMBER** \_\_\_\_\_

**KEBELE CODE** \_\_\_\_\_

Part I

Socio demographic characteristics of the mother or care giver of the child

Ask the caregiver to find the vaccination card (cross-check all information with the card)

እናትየውን የክትባት ካርድ ጠይቀህ/ሽ የምትሰ ጠውን መልስ ከካርዱ ጋር አስተያይ/ዩ

| No  | Question                                                                                  | English                         | Sidamoffo                           |                                  |
|-----|-------------------------------------------------------------------------------------------|---------------------------------|-------------------------------------|----------------------------------|
| 101 | <b>How long have you been living here as household/family? Put in year</b>                |                                 |                                     |                                  |
|     | Tenne mini maate ledo megegshi yanna heerita? Diro KULie                                  |                                 |                                     |                                  |
|     | ቤተሰብህ/ሽ ለምን ያህል ጊዜ እዚህ ቆያችሁ; በአመት አስቀምጥ/ጩ (ከ 6 ወር በታች ከሆነ =0 ፤ ከ 6 ወር በላይ ከሆነ =1 አስቀምጥ/ጩ) |                                 |                                     |                                  |
| 102 | <b>Did your household planed to live here for the next one year?</b>                      |                                 |                                     |                                  |
|     | Danno diro konne heerate hedo noohe?                                                      | 0. <input type="checkbox"/> No  | 0. <input type="checkbox"/> Dinoe   | 0. <input type="checkbox"/> የለውም |
|     | ቤተሰብሽ ለሚቀጥለው 1 አመት እዚህ የመቆየት እቅድ አላችሁ?                                                    | 1. <input type="checkbox"/> Yes | 1. <input type="checkbox"/> Nooe    | 1. <input type="checkbox"/> አለው  |
| 103 | <b>How old is this child? (age in month) and date of birth in GC and EC</b>               |                                 |                                     |                                  |
|     | 3a. Qaaqu ilamino barra(Itiyopiyu kiironni)                                               |                                 |                                     |                                  |
|     | ህጻኑ የተወለደበት ቀን (በኢትዮጵያ አቆጣጠር)                                                             |                                 | ____,____,____                      | ____,____,____                   |
|     | 3b. Illamino barra (aroyopu kiirronni)                                                    |                                 |                                     |                                  |
|     | ህጻኑ የተወለደበት ቀን (በአውሮፓ) አቆጣጠር                                                              |                                 | ____,____,____                      | ____,____,____                   |
|     | 3c. Ilamino barra afamannoki haikkiro qaaqu diro agaanunni                                |                                 |                                     |                                  |
|     | የተወለደበት ቀን የማይታወቅ ከሆነ የልጁ እድሜ በወር                                                         |                                 | _____                               | _____                            |
| 04  | <b>How old are you? (mother age in years)</b>                                             |                                 |                                     |                                  |
|     | Dirikki meeho? Kirotenni kulie.                                                           |                                 |                                     |                                  |
|     | የእናትየው ዕድሜ ስንት ነው ? (በአመት )                                                               |                                 |                                     |                                  |
|     | <b>Is the child a boy or a girl?</b>                                                      |                                 |                                     |                                  |
| 105 | Daaimu Koo/tee? Meyatenso labaho                                                          | 1. <input type="checkbox"/> Boy | 1. <input type="checkbox"/> Labaaho | <input type="checkbox"/> 1.ወንድ   |

**Household code**

**Anemia survey**

|     |                                                                 |                                                 |                                             |                                        |
|-----|-----------------------------------------------------------------|-------------------------------------------------|---------------------------------------------|----------------------------------------|
|     | ሕፃኑ ወንድ ነው ሴት?                                                  | 2. <input type="checkbox"/> Girl                | 2. <input type="checkbox"/> Meyaate         | <input type="checkbox"/> 2.ሴት          |
| 106 | <b>What is your relationship with the child?</b>                |                                                 |                                             |                                        |
|     | Daaimuua ate fixoomi maati?                                     | 1. <input type="checkbox"/> Mother              | 1. <input type="checkbox"/> Amate           | 1 <input type="checkbox"/> አናት         |
|     | አንቺ ለህፃኑ ምኑ ነሽ?                                                 | 2. <input type="checkbox"/> Father              | 2. <input type="checkbox"/> Annaho          | 2 <input type="checkbox"/> አባት         |
|     |                                                                 | 3. <input type="checkbox"/> Step mother /father | 3. <input type="checkbox"/> Buddeenu amate  | 3 <input type="checkbox"/> እንጅራ አናት/ባት |
|     |                                                                 | 4. <input type="checkbox"/> Grand mother/Father | 4. <input type="checkbox"/> Ahaahete/ hoho  | 4 <input type="checkbox"/> አያት         |
|     |                                                                 | 5. <input type="checkbox"/> Sister/brother      | 5. <input type="checkbox"/> Rodoote/Rodooho | 5 <input type="checkbox"/> አህት/ወንድም    |
|     |                                                                 | 6. <input type="checkbox"/> Uncle/Aunt          | 6. <input type="checkbox"/> Aboho/halamete  | 6 <input type="checkbox"/> አጉት/አክሰት    |
|     |                                                                 | 7. <input type="checkbox"/> Other specify       | 7. <input type="checkbox"/> Welere          | 7 <input type="checkbox"/> ሌላ/ዘርዘር     |
| 107 | <b>What is your religion</b>                                    |                                                 |                                             |                                        |
|     | Anunoki meati?                                                  | 1. <input type="checkbox"/> Orthodox            | 1. <input type="checkbox"/> Orthodoksete    | 1 <input type="checkbox"/> አርቶዶክስ      |
|     | ሀይማኖትሽ ምንድን ነው?                                                 | 2. <input type="checkbox"/> Protestant          | 2. <input type="checkbox"/> Protestantete   | 2 <input type="checkbox"/> ጴጌኤ         |
|     |                                                                 | 3. <input type="checkbox"/> Catholic            | 3. <input type="checkbox"/> Katoolikete     | 3 <input type="checkbox"/> ካቶሊክ        |
|     |                                                                 | 4. <input type="checkbox"/> Muslim              | 4. <input type="checkbox"/> Isilamaho       | 4 <input type="checkbox"/> ሙስሊም        |
|     |                                                                 | 5. <input type="checkbox"/> Traditional         | 5. <input type="checkbox"/> Budu amanooti   | 5 <input type="checkbox"/> ባህላዊ        |
|     |                                                                 | 6. <input type="checkbox"/> Other specify       | 6. <input type="checkbox"/> Wolere          | 6 <input type="checkbox"/> ሌላ/ዘርዘር     |
| 108 | <b>What is your marital status?</b>                             |                                                 |                                             |                                        |
|     | Mine kalaqirooto/ta?                                            | 1. <input type="checkbox"/> Single              | 1. <input type="checkbox"/> Minaamedti      | 1 <input type="checkbox"/> ያገባ         |
|     | የጋብቻ ሁኔታሽ/ህ ምን ይመስላል?                                           | 2. <input type="checkbox"/> Married             | 2. <input type="checkbox"/> Qeedhichchaho   | 2 <input type="checkbox"/> ያለገባ        |
|     |                                                                 | 3. <input type="checkbox"/> Divorced            | 3. <input type="checkbox"/> Fateherawase    | 3 <input type="checkbox"/> ተራርቆ የሚኖር   |
|     |                                                                 | 4. <input type="checkbox"/> Widowed             | 4. <input type="checkbox"/> Tiroomo/ma      | 4 <input type="checkbox"/> የተፋታ/ች      |
|     |                                                                 | 5. <input type="checkbox"/> Separated           | 5. <input type="checkbox"/> Shirroomo/ma    | 5 <input type="checkbox"/> የሞተባት/በት    |
| 109 | <b>How many years of completed school does the mother have?</b> |                                                 |                                             |                                        |
|     | Rosu aana mee diro sayisootta                                   |                                                 |                                             |                                        |
|     | በትምህርት ላይ ምን ያህል አመት አሳልፈሻል?                                    |                                                 |                                             |                                        |
| 110 | <b>How many years of completed school does the father have?</b> |                                                 |                                             |                                        |

**Household code**

**Anemia survey**

|     |                                                                                                                                                        |  |
|-----|--------------------------------------------------------------------------------------------------------------------------------------------------------|--|
|     | Annu rosu mine mee dirosayisino<br>የህፃኑ አባት በትምህርት ቤት ምን ያህል አመት አሳልፏል?                                                                                |  |
| 111 | <b>What is the total number of people living in your household?</b><br>Tenne mini maate eiddo moo manni kirro meeho?<br>በዚህ ቤት ውስጥ ምን ያህል ሰው ነው የሚኖረው? |  |
| 11A | <b>A. How many are younger than 5 year?</b><br>Ontu dirii worihu meeho?<br>ከ5 አመት በታች ምን ያህል ናቸው?                                                      |  |
| 11B | <b>How many are 5 and older but younger than 18year?</b><br>Ontu dirii alihuna 18 dirii worihu nee mannati?<br>በ5 አመትና በ18 መካከል ምን ያህል ናቸው?            |  |
| 11C | <b>How many are 19 up to 59year?</b><br>19-59diri geesha nee mannaati?<br>ከ19-59 አመት መካከል ምን ያህል ናቸው?                                                  |  |
| 11D | <b>How many are older than 60 year?</b><br>60 diri alihu meeho?<br>ከ60 አመት በላይ ምን ያህል ናቸው?                                                             |  |

**Part 2 Question on Economic status of the house hold**

Kirro 2 Mini manni maatete jirote bikka

ክፍል 2. የቤተሰብ ምጣኔ ሀብት መለኪያ መጠይቅ

|     |                                                                                                  |                                                          |                                                                         |                                              |
|-----|--------------------------------------------------------------------------------------------------|----------------------------------------------------------|-------------------------------------------------------------------------|----------------------------------------------|
| 201 | <b>What is the mother occupational status?</b><br>Amote loosi hiitooho?<br>የእናትየው ዋና ስራ ምንድን ነው? | 1. [ ] Unemployed<br>2. [ ] Day laborer<br>3. [ ] Farmer | 1. [ ] Loosu dinooho<br>2. [ ] Barru loosasicho<br>3. [ ] Baatote looso | 1 [ ] ሰራ የሌለው<br>2 [ ] የቀን ስራተኛ<br>3 [ ] ገበሬ |
|-----|--------------------------------------------------------------------------------------------------|----------------------------------------------------------|-------------------------------------------------------------------------|----------------------------------------------|

**Household code**

**Anemia survey**

|     |                                                               |                                                 |                                              |                                      |
|-----|---------------------------------------------------------------|-------------------------------------------------|----------------------------------------------|--------------------------------------|
|     |                                                               | 4. <input type="checkbox"/> Merchant            | 4. <input type="checkbox"/> Dadalanchoho     | 4 <input type="checkbox"/> ነጋዴ       |
|     |                                                               | 5. <input type="checkbox"/> NGO employed        | 5. <input type="checkbox"/> Mengistati looso | 5 <input type="checkbox"/> የድርጅት     |
|     |                                                               | 6. <input type="checkbox"/> Government employed | 6. <input type="checkbox"/> Manaisete looso  | 6 <input type="checkbox"/> የመንግሥት    |
|     |                                                               | 7. <input type="checkbox"/> Student             | 7. <input type="checkbox"/> Rosaanchoho      | 7 <input type="checkbox"/> ተማሪ       |
|     |                                                               | 8. <input type="checkbox"/> Other specify       | 8. <input type="checkbox"/> wolere xawisi    | 8 <input type="checkbox"/> ሌላ ካለ ግለፅ |
| 202 | <b>What is the Father occupational status?</b>                |                                                 |                                              |                                      |
|     | Annu Loosi hiitoocho?                                         | 1. <input type="checkbox"/> Unemployed          | 1. <input type="checkbox"/> Loosu dinoocho   | 1 <input type="checkbox"/> ሰራ የሌለው   |
|     | የአባት የሰራ ሁኔታ?                                                 | 2. <input type="checkbox"/> Day laborer         | 2. <input type="checkbox"/> Barru loosasicho | 2 <input type="checkbox"/> የቀን ሰራተኛ  |
|     |                                                               | 3. <input type="checkbox"/> Farmer              | 3. <input type="checkbox"/> Baatote looso    | 3 <input type="checkbox"/> ገበሬ       |
|     |                                                               | 4. <input type="checkbox"/> Merchant            | 4. <input type="checkbox"/> Dadalanchoho     | 4 <input type="checkbox"/> ነጋዴ       |
|     |                                                               | 5. <input type="checkbox"/> NGO employed        | 5. <input type="checkbox"/> Mengistati looso | 5 <input type="checkbox"/> የድርጅት     |
|     |                                                               | 6. <input type="checkbox"/> Government employed | 6. <input type="checkbox"/> Manaisete looso  | 6 <input type="checkbox"/> የመንግሥት    |
|     |                                                               | 7. <input type="checkbox"/> Student             | 7. <input type="checkbox"/> Rosaanchoho      | 7 <input type="checkbox"/> ተማሪ       |
|     |                                                               | 8. <input type="checkbox"/> Other specify       | 8. <input type="checkbox"/> wolere xawisi    | 8 <input type="checkbox"/> ሌላ ካለ ግለፅ |
| 203 | <b>What was last month income?</b>                            |                                                 |                                              |                                      |
|     | Sai aganira megeeshi afidhinoonni                             |                                                 |                                              |                                      |
|     | ባለፈው ወር ቤተሰቡ ያሰገገው ወራዊ ገቢ ምን ያህል ነበር?                         |                                                 |                                              |                                      |
| 204 | <b>What is the average yearly income of the household?</b>    |                                                 |                                              |                                      |
|     | Dirunnit mereerima eone megeeshshaatic?                       |                                                 |                                              |                                      |
|     | በአማካይ የቤተሰቡ አመታዊ ገቢ ምን ያህል ነበር?                               |                                                 |                                              |                                      |
| 205 | <b>How much do you save yearly?</b>                           |                                                 |                                              |                                      |
|     | Dirruni megeeshshi woxe suuqisidhinenni?                      |                                                 |                                              |                                      |
|     | በአመት ምን ያህል ትቆጥባላችሁ?                                          |                                                 |                                              |                                      |
| 206 | <b>House hold facility : Do you have any of the following</b> |                                                 |                                              |                                      |
|     | Mini meate injo konniaane nori gido kinera noori noo'ne?      | 1. <input type="checkbox"/> Electricity         | 1 <input type="checkbox"/> Maabraate         | 1 <input type="checkbox"/> ማብራት      |

**Household code**

**Anemia survey**

|     |                                                                                               |                           |                      |                 |
|-----|-----------------------------------------------------------------------------------------------|---------------------------|----------------------|-----------------|
|     | በቤት ውስጥ ከሚገኙ መገልገያ ቁሶች የትኞቹ አሉሽ?(የሌላትን 0 ሙሉ)                                                  | 2.[_]Radio                | 2[_] Radoone         | 2[_] ራዲዮ        |
|     |                                                                                               | 3.[_]Mobile telephone     | 3[_]Silke            | 3[_] ሰልክ        |
|     |                                                                                               | 4.[_]Non mobile telephone | 4[_] Teevizhiine     | 4[_] ቴሌቪዥን      |
|     |                                                                                               | 5.[_]Television           | 5[_]Qiissaasinchu    | 5[_] ፍሪጅ        |
|     |                                                                                               | 6.[_]Computer             | 6[_]Maabiraatete     | 6[_] የማብራት ምድጃ  |
|     |                                                                                               | 7.[_]Refrigerator         | 7[_] Compitere       | 7[_] ኮምፒውተር     |
|     |                                                                                               | 8.[_]Electric stove       | 8[_] Sayiikile       | 8[_] ሳይክል       |
|     |                                                                                               | 9.[_]Motor bike           | 9[_]Motorete sayikle | 9[_] ሞተር ሳይክል   |
|     |                                                                                               | 10.[_]Car                 | 10[_] ሙኪና            | 10[_] ሙኪና       |
|     |                                                                                               | 11.[_]Other specify       | 11[_] ሌላ ካለ ግለፅ      | 11[_] ሌላ ካለ ግለፅ |
| 207 | <b>Does the household own any agricultural land?</b>                                          |                           |                      |                 |
|     | Konni mini maatera umi'ne baato loosidhinenniti noo'ne?                                       | 0. [_] No                 | 0. [_] Dinoe         | 0[_] የለውም       |
|     | የዚህ ቤት ባለቤት የእርሻ መሬት አለው?                                                                     | 1. [_] Yes                | 1. [_] Nooe          | 1[_] አዎ         |
| 208 | <b>How many (LOCAL UNITS) of agricultural land do this household own?</b>                     |                           |                      |                 |
|     | Allanne halaligine mepeeshite (Kine keeninni) Akine umine baattoti?                           |                           |                      |                 |
|     | የእርሻ መሬት ካለው ምን ያህል መሬት ነው ያለው (በባህላዊ መለኪያ አስቀምጥ )                                            |                           |                      |                 |
| 209 | <b>Does the house hold produce any yield with this land</b>                                   |                           |                      |                 |
|     | Baatone loosine guma afidhinenni?                                                             | 0. [_] No                 | 0. [_]Diafineeno     | 0[_] የለውም       |
|     | በዚህ መሬት የምታመርቱት ምርት አለ?                                                                       | 1. [_] Yes                | 1. [_]Afineeno       | 1[_] አዎ         |
|     |                                                                                               |                           |                      |                 |
| 210 | <b>Does your house hold own any domestic animal</b>                                           |                           |                      |                 |
|     | Konni mini maatera mini saado no?                                                             | 1. [_] Yes                | 0. [_] Dinoe         | 0 [_].አይደለም     |
|     | የቤት እንስሳት አላችሁ?                                                                               | 2. [_] No                 | 1. [_] Nooe          | 1 [_].አዎ        |
| 211 | <b>How much of the following do you have?</b><br>Afidhinoonniha ikkiro hiite saada? Megessha? | Chicken                   | 1.Lukkicho_____      | 1. ዶሮ _____     |

**Household code**

**Anemia survey**

|                                 |                                                                                     |                                            |                                        |                               |
|---------------------------------|-------------------------------------------------------------------------------------|--------------------------------------------|----------------------------------------|-------------------------------|
|                                 | የቤት እንሰሳ ካላችሁ ከሚከተሉት ውስጥ ምን ያህል ዐላችሁ?(የሌለውን 0 አስቀምጥ)                                | Goat                                       | 2. Meicho_____                         | 2. ፍየል_____                   |
| ዝለል<br>Skip                     |                                                                                     | Sheep                                      | 3.Gereewo_____                         | 3. በግ _____                   |
|                                 |                                                                                     | Ox                                         | 4.Bootta_____                          | 4. በሬ _____                   |
|                                 |                                                                                     | Cow                                        | 5.Lalo_____                            | 5. ላም _____                   |
|                                 |                                                                                     | Donkey                                     | 6.Harricho_____                        | 6. አህያ _____                  |
|                                 |                                                                                     | Other specify                              | 7.wolere xawisi_____                   | 7. ሌላ ዘርዘሪ/C_____             |
|                                 |                                                                                     |                                            |                                        |                               |
| 212<br>ዝለል<br>Skip              | <b>If yes for question number 211 Do you feed animal products for your children</b> |                                            |                                        |                               |
|                                 | Saedate winni afidhi nannire daaimaho uyitinnan?                                    | 0.[_]No                                    | 0. [_] Dinoe                           | 0. [_] አላበላም                  |
|                                 | የራሰሽን የከብቶች ተዋፅኦ ለልጆቻችሁ ታብያለሽ?                                                      | 1.[_]Yes                                   | 1. [_] Nooe                            | 1. [_] አዎ                     |
| 213                             | <b>What type of latrine do you have</b>                                             |                                            |                                        |                               |
|                                 | Shumate mini hittoohu noone?                                                        | 1.[_]No facility/bush/field                | 1[_]Dinoe                              | 1[_]የለንም                      |
|                                 | ምን አይነት ሽንት ቤት ነው ያላችሁ?                                                             | 2.[_]Composting toilet                     | 2[_]Irshu giddo                        | 2[_]የማሳ ውስጥ                   |
|                                 |                                                                                     | 3.[_]Open pit                              | 3[_]Haqunnabushshunni calla tu'nooni   | 3[_]ከፍት ጉድገድ                  |
|                                 |                                                                                     | 4.[_]Pit latrine with slab                 | 4[_]Simmintoteni loonsoonnishuma mine. | 4[_]የወለል ልባስ ያለው የጉድገድ ሽንት ቤት |
|                                 |                                                                                     | 5.[_]Ventilated improved pit latrine (vip) | 5[_]Tuubbotenni foolanno shuamte mine. | 5[_]የተሻሻለ የጉድገድ ሽንት ቤት        |
| 6.[_]Flush or pour flush toilet |                                                                                     | 6[_]Wiyiinni loosanno shumate mine.        | 6[_]በውሀ የሚሄድ ሽንት ቤት                    |                               |
| 214                             | <b>What is the main source of drinking water for your house hold</b>                |                                            |                                        |                               |
|                                 | Waa horonsidhinonnihu maminniti?                                                    | 1.[_]unprotected well/spring               | 1[_]Huxxinoonnkki buichcho             | 1[_]ካልተከለለ የከርሰ ምድርውሀ         |
|                                 | የመጠጥ ውሀ በዋናነት ከየት ነው የምትጠቀሙት?                                                       | 2.[_]protected spring/well                 | 2[_]Huxxinoonni buichcho               | 2[_]ከተከለለ የከርሰ ምድር ውሀ         |
|                                 |                                                                                     | 3.[_]tanker truck                          | 3[_]Rottote giddo kuusanino waa        | 3[_]ከማጠራቀሚያ                   |
|                                 |                                                                                     | 4.[_]public tap/standpipe                  | 4[_]Olluu horons' rano                 | 4[_]ከህዝብ ሷንሷ                  |

Household code

Anemia survey

|  |                          |                       |                |
|--|--------------------------|-----------------------|----------------|
|  |                          | 5[_]waa Gibbete giddo |                |
|  | 5.[_]piped into dwelling | 5[_]Waa Gibbete giddo | 5[_]ግቢ ከገባ ዒንቧ |

**Part 3 child feeding practice**  
**Kiiro 3 Qaaqqu sagalate gara**  
 ክፍል 3 የህፃኑ አመጋገብ ሁኔታ

| No  | Question                                                                                                     | Answer                                                    |                                                                          | መልስ                                                   |
|-----|--------------------------------------------------------------------------------------------------------------|-----------------------------------------------------------|--------------------------------------------------------------------------|-------------------------------------------------------|
| 301 | <b>Do you feed breast milk to your child?</b>                                                                |                                                           |                                                                          |                                                       |
|     | Daaima unuuna qansata?<br>ህፃኑን ዐሁን ጡት ታጠቢዋለሽ?                                                                | 1. [_] Yes<br>2. [_] No                                   | 1. [_] Qanseema<br>2. [_]Diqaanseema                                     | 1[_] አዎ<br>2[_] አላጠባውም                                |
| 302 | <b>If the mom is not breastfeeding now:<br/>Did you ever breastfeed your child?</b>                          |                                                           |                                                                          |                                                       |
|     | Ama unuunna qansitahakkiha ikkiro Qaaqqokk unuuna qansootta<br>እናትየው ዐሁን ጡት ማታጠባ ከሆነ ልጅሽን ጡት አጥብተሽው ነበር(በፊት) | 1. [_] Yes<br>2. [_] No                                   | 1. [_] Qanseema<br>2. [_]Diqaanseema                                     | 1[_] አዎ<br>2[_] አላጠባውም                                |
| 303 | <b>What is the number of meals normally taken by the child per day?</b>                                      |                                                           |                                                                          |                                                       |
|     | Daaaimikki barrunni meu dani sagale itanno?<br>ህፃኑ አሁን በቀን ምንያህል ጊዜ ነው የሚመገበው                                |                                                           |                                                                          |                                                       |
| 304 | <b>Does child can feed himself/herself</b>                                                                   |                                                           |                                                                          |                                                       |
|     | Daaimu sagale umisinni saga'la dandaanno?<br>ህፃኑ በራሱ መመገብ ይችላል?                                              | 1[_]Care giver<br>2[_]With assistance<br>3[_]Self feeding | 1[_]Manncholaatisannohu<br>2[_]Irkotenniteitanohu<br>3[_]Umosit itannohu | 1[_]ተንከባካቢ ያበላዋል<br>2[_]በዕገዛ ይበላል<br>3[_]ህፃኑ በራሱ ይበላል |

**Part 4: 24 Hour Dietary Diversity Questioner**  
 Gaamo 4: 24 Sagalete danixamo  
 ክፍል:4:በ24 ሰዓት ውስጥ የወሰደውን የምግብ አይነት የሚገልጥ ጥያቄ

| No | Type of food |  |  |  |  |
|----|--------------|--|--|--|--|
|----|--------------|--|--|--|--|



**Household code**

**Anemia survey**

|     |                                                                                                                                                                                                                                                                                                                                    |         |                  |             |  |
|-----|------------------------------------------------------------------------------------------------------------------------------------------------------------------------------------------------------------------------------------------------------------------------------------------------------------------------------------|---------|------------------|-------------|--|
| 401 | <b>I am going to ask you questions about what you fed your baby from the time you woke up yesterday morning till you woke up this morning either separately or combined with other foods.</b>                                                                                                                                      |         |                  |             |  |
|     | Bero soodo qoxootto wiinni kaitto yannanni hanaffe techo soodo geeshsha aante noo segalla giddo daaimaho itisootto sagale no? Itisoottaha ikkiro me'e higge itisoottoro kulattoe? Itisootto segale no<br>ሀሁን ህፃኑ ከትላነት ጠዋት ዕስከ ዛሬ ጠዋት የተመገበውን የምግብ ዐይነት ዕጠይቅሻለሁ (ህፃኑ የተመገበውን ቁርስ፣ ጥጥር ዕራት ዕንዲሁም በየመሀል የተመገበውን በመጠየቅ የሚሰማውን ቦታ ጥቀስ) |         |                  |             |  |
| 402 | <b>Did your child eat any porridge or gruel (from what it made)</b>                                                                                                                                                                                                                                                                |         |                  |             |  |
|     | Daaimu sherko woy axmiite saga'lino (mayinni qixxeessinoonniha)?<br>ልጅሽ ከማንኛውም የአህል ዘር የተሰራ ገንፎ ወይም ሙቅ ተመግቧል?                                                                                                                                                                                                                      | 0[ ] No | 0.[ ]Disaga'lino | 0[ ] አልተመገም |  |
| 403 | <b>Bread, pasta, rice, noodles, biscuits, cookies or any other food made from ,oats, maize, barley, wheat, sorghum millet, or other grain? Specify</b>                                                                                                                                                                             |         |                  |             |  |
|     | Daabbo,paarta,ruuze,koshoro raino sagale woy ajjunni ,badalatenni ,hayixunni,qamadetenni,bashanqunniy loonsoonni sagale woy wolu quminni,xawisi<br>ዳቦ፣ ፓስታ፣ ፋዝ፣ ብሰኩት፣ ኩኪስ፣ ወይም ማንኛውም ነገር ከአጃ ከባቆሎ ገብስ፣ ሰንዴ፣ ማሽለ፣ ወይም ሌላ አህል ዘር የተሰራ                                                                                                | 0[ ] No | 0.[ ]Disaga'lino | 0[ ] አልተመገም |  |
| 404 | <b>Any food made from teff , like injera ,kita or porridge ?</b>                                                                                                                                                                                                                                                                   |         |                  |             |  |
|     | Gaashetenni qqxxeessinoonnic segale buddeena, tima,woy sherko lawinore saga'lino?<br>ማንኛውም ምግብ ከጤፍ የተሰራ (እንጂራ፣ ቁጣ፣ ገንፎ)                                                                                                                                                                                                            | 0[ ] No | 0.[ ]Disaga'lino | 0[ ] አልተመገም |  |
| 405 | <b>Any white potatoes, white yam?</b>                                                                                                                                                                                                                                                                                              |         |                  |             |  |
|     | Maxaaxeesla, diinicha, boyina,lawinore saga'lino?                                                                                                                                                                                                                                                                                  | 0[ ] No | 0.[ ]Disaga'lino | 0[ ] አልተመገም |  |

**Household code**

**Anemia survey**

|     |                                                                                                 |                                |                                          |                                   |  |
|-----|-------------------------------------------------------------------------------------------------|--------------------------------|------------------------------------------|-----------------------------------|--|
|     | ማንኛውም ነጭ ድንች፤ ቦይና፤ እንሰት (ማንኛውም ነጭ ስራስር)                                                         | 1 <input type="checkbox"/> Yes | 1. <input type="checkbox"/> Saga' lino   | 1 <input type="checkbox"/> ተመግ ሲል |  |
| 406 | <b>Any foods made from beans, peas, lentils or pulses</b>                                       |                                |                                          |                                   |  |
|     | Aye segale baqeluuni, atarunni , qibaatete qumma shumburunni qixxeessinoonni sagale saga' lino? | 0 <input type="checkbox"/> No  | 0. <input type="checkbox"/> Disaga' lino | 0 <input type="checkbox"/> አልተመገም |  |
|     | ባቂላ፤ አተር፤ ምስር ወይም ሌላ ጥራጥራ                                                                       | 1 <input type="checkbox"/> Yes | 1. <input type="checkbox"/> Saga' lino   | 1 <input type="checkbox"/> ተመግ ሲል |  |
| 407 | <b>Any nuts or seed such as peanut, sesame or sun flower seeds?</b>                             |                                |                                          |                                   |  |
|     | Ayee qumma ocholoone coommadda gumma saga' lino                                                 | 0 <input type="checkbox"/> No  | 0. <input type="checkbox"/> Disaga' lino | 0 <input type="checkbox"/> አልተመገም |  |
|     | አቾሎኒ (ከአቾሎኒ የተሰራ ማንኛውም ምግብ)                                                                     | 1 <input type="checkbox"/> Yes | 1. <input type="checkbox"/> Saga' lino   | 1 <input type="checkbox"/> ተመግ ሲል |  |
| 408 | <b>Any butter, oil</b>                                                                          |                                |                                          |                                   |  |
|     | Zayitetenni woy buurumi loonsoonni sagala                                                       | 0 <input type="checkbox"/> No  | 0. <input type="checkbox"/> Disaga' lino | 0 <input type="checkbox"/> አልተመገም |  |
|     | በዘይት ወይም በ                                                                                      | 1 <input type="checkbox"/> Yes | 1. <input type="checkbox"/> Saga' lino   | 1 <input type="checkbox"/> ተመግ ሲል |  |
| 409 | <b>Any dark green, leafy vegetables like kale, spinach or amaranth leaves?</b>                  |                                |                                          |                                   |  |
|     | Haanjarino, daraame ataakiltete daronna xu'naayye lawinore saga' lino?                          | 0 <input type="checkbox"/> No  | 0. <input type="checkbox"/> Disaga' lino | 0 <input type="checkbox"/> አልተመገም |  |
|     | ማንኛውም ጥቁር አረንጓዴ አታክልት፤ ቅጠላማ አታክልት እንደ ጎመን፤ ራፎ ወይም ሌላ (ዘርዘር)                                     | 1 <input type="checkbox"/> Yes | 1. <input type="checkbox"/> Saga' lino   | 1 <input type="checkbox"/> ተመግ ሲል |  |
|     | <b>Any pumpkin ,carrot, squash or sweet potatoes that are yellow or orange inside</b>           |                                |                                          |                                   |  |
| 410 | Giddo bica woy haanjirino baaqulaa, kaarootte woy maxaaxeesha saga' lino?                       | 0 <input type="checkbox"/> No  | 0. <input type="checkbox"/> Disaga' lino | 0 <input type="checkbox"/> አልተመገም |  |
|     | ማንኛውም ዱባ፤ ካሮት ቢጫ ሰኳር ድንች ሌላ (ዘርዘር)                                                              | 1 <input type="checkbox"/> Yes | 1. <input type="checkbox"/> Saga' lino   | 1 <input type="checkbox"/> ተመግ ሲል |  |
| 411 | <b>Any ripe mangoes, papayas?</b>                                                               |                                |                                          |                                   |  |
|     | Le'ado mango woy paapaayya saga' lino?                                                          | 0 <input type="checkbox"/> No  | 0. <input type="checkbox"/> Disaga' lino | 0 <input type="checkbox"/> አልተመገም |  |
|     | የበሰለ ማንጎና ፓፓያ                                                                                   | 1 <input type="checkbox"/> Yes | 1. <input type="checkbox"/> Saga' lino   | 1 <input type="checkbox"/> ተመግ ሲል |  |
|     | <b>Any other fruit or vegetables</b>                                                            |                                |                                          |                                   |  |

**Household code**

**Anemia survey**

|     |                                                                                                                   |                                |                                         |                                    |  |
|-----|-------------------------------------------------------------------------------------------------------------------|--------------------------------|-----------------------------------------|------------------------------------|--|
| 412 | Wole aye gumma woy akaakilte saga'lino?                                                                           | 0 <input type="checkbox"/> No  | 0. <input type="checkbox"/> Disaga'lino | 0 <input type="checkbox"/> አልተመገብም |  |
|     | ሌላ ማንኛውም አታክልትና ፍራፍሬ                                                                                              | 1 <input type="checkbox"/> Yes | 1. <input type="checkbox"/> Saga'lino   | 1 <input type="checkbox"/> ተመገብኩል  |  |
| 413 | <b>Commercially fortified foods.</b>                                                                              |                                |                                         |                                    |  |
|     | Ashshagantinota daaimu segale?                                                                                    | 0 <input type="checkbox"/> No  | 0. <input type="checkbox"/> Disaga'lino | 0 <input type="checkbox"/> አልተመገብም |  |
|     | በምግብ በልፅገው የሚሸጡ ምግቦች                                                                                              | 1 <input type="checkbox"/> Yes | 1. <input type="checkbox"/> Saga'lino   | 1 <input type="checkbox"/> ተመገብኩል  |  |
| 414 | <b>Any cheese or yogurt?</b>                                                                                      |                                |                                         |                                    |  |
|     | Ayibe/geinto saga'lino?                                                                                           | 0 <input type="checkbox"/> No  | 0. <input type="checkbox"/> Disaga'lino | 0 <input type="checkbox"/> አልተመገብም |  |
|     | አይብና አርጎ                                                                                                          | 1 <input type="checkbox"/> Yes | 1. <input type="checkbox"/> Saga'lino   | 1 <input type="checkbox"/> ተመገብኩል  |  |
| 415 | <b>Fresh milk</b>                                                                                                 |                                |                                         |                                    |  |
|     | Ibbado ado                                                                                                        | 0 <input type="checkbox"/> No  | 0. <input type="checkbox"/> Disaga'lino | 0 <input type="checkbox"/> አልተመገብም |  |
|     | ትኩስ ወተት                                                                                                           | 1 <input type="checkbox"/> Yes | 1. <input type="checkbox"/> Saga'lino   | 1 <input type="checkbox"/> ተመገብኩል  |  |
| 416 | <b>Any eggs?</b>                                                                                                  |                                |                                         |                                    |  |
|     | Ayee quuphe                                                                                                       | 0 <input type="checkbox"/> No  | 0. <input type="checkbox"/> Disaga'lino | 0 <input type="checkbox"/> አልተመገብም |  |
|     | አንቁላል                                                                                                             | 1 <input type="checkbox"/> Yes | 1. <input type="checkbox"/> Saga'lino   | 1 <input type="checkbox"/> ተመገብኩል  |  |
| 417 | <b>Any liver ,kidney, heart or other organ meats</b>                                                              |                                |                                         |                                    |  |
|     | Afale,mule, wodana,woy wole godowu giddo maalla saga'lino?                                                        | 0 <input type="checkbox"/> No  | 0. <input type="checkbox"/> Disaga'lino | 0 <input type="checkbox"/> አልተመገብም |  |
|     | ጉብት፣ ኩላሊት፣ ልብ ወይም የአንሰሳ የውስጥ ሰውነት ክፍል                                                                             | 1 <input type="checkbox"/> Yes | 1. <input type="checkbox"/> Saga'lino   | 1 <input type="checkbox"/> ተመገብኩል  |  |
| 418 | <b>Any beef, pork, lamb, goat, rabbit (wild game meat such as antelope or deer)?</b>                              |                                |                                         |                                    |  |
|     | Bootu maala, mancheemete maala, gereewo,mellenna hilleessa (wole dubbu saada,goljanna,guru'me lawinore segalino?) | 0 <input type="checkbox"/> No  | 0. <input type="checkbox"/> Disaga'lino | 0 <input type="checkbox"/> አልተመገብም |  |
|     | የቦሬ ስጋ፣ የበግ/የፍየል ስጋ የአሳማ ስጋ የጥንቸል ወይም ሌላ አንሰሳ                                                                     | 1 <input type="checkbox"/> Yes | 1. <input type="checkbox"/> Saga'lino   | 1 <input type="checkbox"/> ተመገብኩል  |  |
| 419 | <b>Any chicken ,duck or other birds</b>                                                                           |                                |                                         |                                    |  |
|     | Lukko, daakiyye, woy wole cea maala saga'lino                                                                     | 0 <input type="checkbox"/> No  | 0. <input type="checkbox"/> Disaga'lino | 0 <input type="checkbox"/> አልተመገብም |  |
|     | ዶሮ፣ እርግብ ወይም የወፍ ስጋ                                                                                               | 1 <input type="checkbox"/> Yes | 1. <input type="checkbox"/> Saga'lino   | 1 <input type="checkbox"/> ተመገብኩል  |  |
|     | <b>Any fish</b>                                                                                                   |                                |                                         |                                    |  |

**Household code**

**Anemia survey**

|     |                                                |          |                  |              |  |
|-----|------------------------------------------------|----------|------------------|--------------|--|
| 420 | Ayee qilxi'me                                  | 0[ ] No  | 0.[ ]Disaga'lino | 0[ ] አልተመገንም |  |
|     | ማንኛውም አሳና የአሳ ምርት                              | 1[ ] Yes | 1.[ ]Saga'lino   | 1[ ] ተመገግ ሲል |  |
| 421 | <b>Any soft drink specify</b>                  |          |                  |              |  |
|     | Ayee shota agatto agino? Aginoha ikkiro xawisi | 0[ ] No  | 0.[ ]Disaga'lino | 0[ ] አልተመገንም |  |
|     | ማንኛውም ለሰላሳ መጠጦች                                | 1[ ] Yes | 1.[ ]Saga'lino   | 1[ ] ተመገግ ሲል |  |
| 422 | <b>Coffee and Tea</b>                          |          |                  |              |  |
|     | Buna woy shae agino                            | 0[ ] No  | 0.[ ]Disaga'lino | 0[ ] አልተመገንም |  |
|     | ቡናና ሻይ                                         | 1[ ] Yes | 1.[ ]Saga'lino   | 1[ ] ተመገግ ሲል |  |
| 423 | Alcoholic drink                                |          |                  |              |  |
|     | Diribisanno ago (birra,xesiixella,areqe)       | 0[ ] No  | 0.[ ]Disaga'lino | 0[ ] አልተመገንም |  |
|     | አልኮል መጠጦች (ቢራ፣ አረቄ፣ ጠጅ፣ጠላ)                     | 1[ ] Yes | 1.[ ]Saga'lino   | 1[ ] ተመገግ ሲል |  |
| 424 | <b>Other specify</b>                           |          |                  |              |  |
|     | Welere                                         |          |                  |              |  |
|     | ሌላ ካለ ጥቀስ                                      |          |                  |              |  |

**Part 5: 7-Days Food frequency questionnaire for iron rich foods**

Sufetto 5: 7 barri giddo ayirenetenni lattino sagale marri marro

ክፍል 5፣ በ7ት ቀን ውስጥ ህጻኑ የወሰደው የምግብ አይነት

| No  | Question                                                                                                                                                                                                                                                                                                                                                                                                                                   | Answer the number of the day you eat<br>መልሱን በቀናት ቁጥር ይጠቁም |
|-----|--------------------------------------------------------------------------------------------------------------------------------------------------------------------------------------------------------------------------------------------------------------------------------------------------------------------------------------------------------------------------------------------------------------------------------------------|------------------------------------------------------------|
| 501 | <p><b>Now I am going to ask you if you gave the following items at all the last week ending yesterday morning. Please answer yes if you gave it and no if you did not give it And if you did, will you please tell how many times you gave it</b></p> <p>Xa xa'meemohehu sa'u lamala jeefonni kayise be'ro soodo geeshsha saga'lino sagaleeti.itinno sagale "saga'lino" itinnoki sagale "di'saga'lino" yite me'e marro itinoro xawasi.</p> |                                                            |

**Household code**

**Anemia survey**

|     |                                                                                                       |  |
|-----|-------------------------------------------------------------------------------------------------------|--|
|     | አሁን የምጠይቅሽ ልጅሽ ባለፉት 7ቀን ውስጥ አስከ ዛሬ ጠዋት የበላውን የምግብ አይነት ነው ለአያንዳንዱ መልሰ ቁጥሩን ግለጬ ካልተመገበ ዜሮ መጻፍን አትርሳ(ሺ) |  |
| 502 | <b>Food made from false banana (Kocho,kita,bula,omolicho,genfo)</b>                                   |  |
|     | Inset?                                                                                                |  |
|     | እንስት(ቆጮ፣ ቡላ...)?                                                                                      |  |
| 503 | <b>Cereal group (maize, barley, wheat, oats, ....)</b>                                                |  |
|     | Weese (badala,hayiixe                                                                                 |  |
|     | የእህልዘር( በቆሎ፣ ጉብስ፣ ስንዴ፣ አጃ፣ ዳጉሳ፣                                                                       |  |
| 504 | <b>Pulse group (bean,pea,chickpea,....)</b>                                                           |  |
|     | Qixxeessinoonni (baqeluuni, atarunni ,qibaatete qumma shumburunni?)                                   |  |
|     | የጥራጥሬ ዘር( አተር፣ ሸንብራ፣ ባቂላ፣ምስር.....)                                                                    |  |
| 505 | <b>Teff (ingera,bred,porrage)</b>                                                                     |  |
|     | Gaashe                                                                                                |  |
|     | ጤፍ                                                                                                    |  |
| 506 | <b>Peanut</b>                                                                                         |  |
|     | Ocholoone                                                                                             |  |
|     | አጃሎኒ                                                                                                  |  |
| 507 | <b>Dark green vegetables (Kale,green paper,qosta)</b>                                                 |  |
|     | Haanja daro atakille shaana, qaariya,Xu'naaye, raafote daro                                           |  |
|     | ጥቁር አረንጎዴ አታክልቶች(ጎመን፣ ቃረያ፣ ጥቁር ጎመን፣ ራፎ. ....)                                                         |  |
| 508 | <b>Tomato, Carrot, watermelon, pumpkin</b>                                                            |  |
|     | Timaatime,karoot, Baaqula                                                                             |  |
|     | ቲማቲም፣ ካሮት፣ ዱባ                                                                                         |  |
| 509 | <b>ripe mango, papaya</b>                                                                             |  |
|     | Lino mango,Lino pappayya                                                                              |  |
|     | የበሰለ ማንጎ፣ የበሰለ ፓፓያ                                                                                    |  |
| 510 | <b>orange, lemmon,</b>                                                                                |  |
|     | Burtukanenna loome                                                                                    |  |

## Household code

## Anemia survey

|     | ብርቱካንና ሎሚ                                               |  |
|-----|---------------------------------------------------------|--|
| 511 | <b>Amaranth leaf or grain</b>                           |  |
|     | Raffote daronna guma                                    |  |
|     | የራፎ ቅጠል ወይም ፍሬ                                          |  |
| 512 | <b>Milk and milk product</b>                            |  |
|     | Ado geinto burbuxxo                                     |  |
|     | ወተት፣ እርጎ፣ አይብ                                           |  |
| 513 | <b>Any food contains butter or oil</b>                  |  |
|     | Zayitetenni woy buurumi loonsoonni sagala               |  |
|     | በዘይት ወይም በቅቤ የተሰራ ምግብ                                   |  |
| 514 | <b>Egg</b>                                              |  |
|     | Quuphphe                                                |  |
|     | እንቁላል                                                   |  |
| 515 | <b>Red meet (sheep, goat, ox)</b>                       |  |
|     | Dummo maala (bootunniha meichchunniha, gerechch unniha) |  |
|     | ቀይ ስጋ (የበሬ፣ የፍየል፣ የበግ)                                  |  |
| 516 | <b>Chicken meet</b>                                     |  |
|     | Lukkichchu maala                                        |  |
|     | የዶሮ ስጋ                                                  |  |
| 517 | <b>Fish</b>                                             |  |
|     | Qulxume                                                 |  |
|     | አሳ                                                      |  |
| 518 | <b>Internal organ (liver, kidney, heart)</b>            |  |
|     | Giddoodi mannimma gaamo maalal fale(kulalitite, wodana) |  |
|     | የውስጥ የሰውነት ክፍል ሥጋ (ጉበት፣ ኩላሊት፣ ልብ)                       |  |
| 519 | <b>Coffe or tea</b>                                     |  |
|     | Shaenna buna                                            |  |
|     | ሻይ ወይም ቡና                                               |  |
| 520 | <b>Soft drink</b>                                       |  |

**Household code**

**Anemia survey**

|     |                                                         |  |
|-----|---------------------------------------------------------|--|
|     | Shaffado ago<br>ለስላሳ መጠጦች                               |  |
| 521 | <b>Any alcohol</b><br>Kajjado ago<br>ዐልኮል መጠጦች          |  |
| 522 | <b>Others specify</b><br>Wole kunni assi<br>ሌላ ካለ ግለፅ/ጨ |  |

**Part VI Supplementation question**

**Kifile 6 Ledishu sagale xa'mo**

ክፍል 6፤ ተጨማሪ ምግብ ስለመውሰድ የሚገልጽ መጠይቅ

|             | Question                                                             |            |                  | Code      |
|-------------|----------------------------------------------------------------------|------------|------------------|-----------|
| 601         | <b>Do you feed the child any foods made with oil, fat or butter?</b> |            |                  |           |
|             | Zayite, buuronna,coomu sagale saga'lano?                             | 0. [ ] No  | 0.Disagalino[ ]  | 0[ ]አይደለም |
|             | ልጅሽን ዘይት፣ ጭማ ወይም ቅቤ ያለበትን ምግብ ትመግቡዋለሽ                                | 1. [ ] Yes | 1.Sagalino[ ]    | 1[ ]አዎን   |
|             | <b>If yes for question number 601 do you feed every day</b>          |            |                  |           |
| 602         | Barrunni daaimu me'e marro saga'lano                                 | 0. [ ] No  | 0.Disagalino[ ]  | 0[ ]አይደለም |
| ዝለል<br>Skip | ከመገብሽው በየቀኑ ትመግቡዋለሽ                                                  | 1. [ ] Yes | 1. Sagalino[ ]   | 1 [ ]አዎን  |
| 603         | <b>Has your child ever received Iron supplementation</b>             |            |                  |           |
|             | Daaimu ayirenete lattinota ledishu sagale afiranno?                  | 0. [ ] No  | 0. Disagalino[ ] | 0[ ]አይደለም |
|             | የደም መሙያ አንክብል ወሰዱ ያውቃል?                                              |            | 1. Sagalino[ ]   | 1[ ]አዎን   |
|             | <b>If yes for question number 603 Why he or she received?</b>        |            |                  |           |

**Household code**

**Anemia survey**

|          |                                                         |                               |                        |                    |
|----------|---------------------------------------------------------|-------------------------------|------------------------|--------------------|
| 604      | 19kki xamo saga'lanoha ikiro Mayirra sagalanno?         |                               |                        |                    |
| ዝለል skip | የደም መመድያ እንክብል ከወሰደ ለምንድን ነው የወሰደው                      |                               |                        |                    |
|          | <b>From where do you get?</b>                           |                               |                        |                    |
| 605      | Maminni afidhinonni?                                    | 1.[_] From health institution | 1[_]Fayyimateurishinni | 1 [_]ከጤና ተቋም       |
| ዝለል skip | የደም መመድያ እንክብል ከየት ነው የተሰጠው?                            | 2.[_] Food aid program        | 2[_]Sagallte qixawonni | 2 [_]ከምግብ ኘርግራም    |
|          |                                                         | 3.[_]Pharmacy                 | 3[_]Farmasetenni       | 3 [_]ፋርማሲ          |
|          |                                                         | 4. [_]Other specify           | 4[_]Wolekuli           | 4 [_]ሌላጥቀስ         |
| 606      | <b>Does the child taking now?</b>                       |                               |                        |                    |
| ዝለል Skip | Qaaqqu xaano mundee abbitawoota xagicho adhayno?        | 0. [_] No                     | 0.Disagalino[ ]        | 0[ ]አይወስድም         |
|          | ህፃኑ አሁንም የደም መመድያ እንክብል አየወሰደ ነው?                       | 1. [_] Yes                    | 1.Sagalino[ ]          | 1[ ]አዎ             |
| 607      | <b>For how long he /she take supplementation?</b>       |                               |                        |                    |
| ዝለል Skip | Ladishshu sagale mageshi geeeshsha sagalanno?           |                               |                        |                    |
|          | የደም መመድያ ዕንክብል ከወሰደ ለምን ያህል ጊዜ ወሰደ በወራት ጥቅሽ/ስ?          |                               |                        |                    |
| 608      | <b>Has your child ever eat iron fortified food</b>      |                               |                        |                    |
|          | Daaimikki Ayiirenetenni kaajjinshoonni sagle sagalanno? | 0. [_] No                     | 0. Disagalino[ ]       | 0[ ]አይወስድም         |
|          | ህፃንሽ ደምን በሚሞላ የብረት ንጥረ ነገር የበለፀገ ምግብ በልቶ ያውቃል?          | 1. [_] Yes                    | 1. Sagalino[ ]         | 1[ ]አዎ             |
| 609      | <b>If yes for question number 608</b>                   |                               |                        |                    |
| ዝለል Skip | <b>From where do you get</b>                            |                               |                        |                    |
|          | Hiikiinni afiranno?                                     | 1.[_]From health institution  | 1[_]Fayyimateurishinni | 1[ ]ጤናተቋም          |
|          | ከበላ ከየት ነው ያገኘሽው?                                       | 2.[_]Food aid program         | 2[_]Sagallte qixawonni | 2[ ]የምግብ ኘር ግራም    |
|          |                                                         | 3.[_]Pharmacy                 | 3[_]Farmasetenni       | 3[ ]ፋርማሲ           |
|          |                                                         | 4.[_]Other specify            | 4[_]Wolekuli           | 5[ ]ሌላ ካለ (ዘርዘር/ሬ) |



Household code

Anemia survey

|                    |                                                                                |                                             |                                              |                                        |
|--------------------|--------------------------------------------------------------------------------|---------------------------------------------|----------------------------------------------|----------------------------------------|
| 610<br>ዝለል<br>Skip | <b>Is the child taking now?</b>                                                |                                             |                                              |                                        |
|                    | Mamoote saga'lanno?                                                            | 0. <input type="checkbox"/> No              | 0 <input type="checkbox"/> Disagalino        | 0 <input type="checkbox"/> አይደለም       |
|                    | አሁንም ህጻኑ አየተመገበ ነው (ዕየተመገበ ከሆነ ዐሳዩኝ)?                                          | 1. <input type="checkbox"/> Yes             | 1 <input type="checkbox"/> Sagalino          | 1 <input type="checkbox"/> አዎን         |
| 611<br>ዝለል<br>Skip | <b>What was the food?</b>                                                      |                                             |                                              |                                        |
|                    | Sagale maati?<br>የሚወሰደው የበለጸገ ምግብ ምን ነበር (ያሳዩትህን የምግብ ዐይነት ጻፍ?)                |                                             |                                              |                                        |
| 612<br>ዝለል<br>Skip | <b>For how long she/he take?</b>                                               |                                             |                                              |                                        |
|                    | Mageeshshi geeshe saga'lano?<br>የበለጸገ ምግቡን ለምን ያህል ጊዜ ወሰደ(ወሰደች) በወራት ጥቀሽ/ስ?    |                                             |                                              |                                        |
| 613                | <b>Has the child ever been given a Vit A capsule?</b>                          |                                             |                                              |                                        |
|                    | Daaimu vitaamine A kinine afire egennino?                                      | 0. <input type="checkbox"/> No              | 0. <input type="checkbox"/> Disagalino       | 0. <input type="checkbox"/> አያውቅም      |
|                    | ህፃኑ የሻይታሚን A እንክብል ወሰደ ያውቃል?                                                   | 1. <input type="checkbox"/> Yes             | 1. <input type="checkbox"/> Sagalino         | 1. <input type="checkbox"/> አዎ         |
| 614<br>ዝለል<br>Skip | <b>If yes for question no 613 how often did he/she get</b>                     |                                             |                                              |                                        |
|                    | kki xa'mo afirinnoha ikkiro ,me'e marro afirino?                               |                                             |                                              |                                        |
|                    | ሻይታሚን A ከወሰደ በአመት ምን ያህል ጊዜ ያገኛል?                                              |                                             |                                              |                                        |
| 615                | <b>Since you were pregnant Have you taken any Iron supplements?</b>            |                                             |                                              |                                        |
|                    | Godowii heedhe ayiirenete lattino sagale afiroota?                             | 0. <input type="checkbox"/> No              | 0. <input type="checkbox"/> Disagalino       | 0. <input type="checkbox"/> አያውቅም      |
|                    | እርጉዝ ሆነሽ ደም የሚሞላ እንክብል ወሰደሽ ታውቂያለሽ?                                            | 1. <input type="checkbox"/> Yes             | 1. <input type="checkbox"/> Sagalino         | 1. <input type="checkbox"/> አዎ         |
| 616<br>ዝለል<br>Skip | <b>If yes for question number 21 for how long did you taken the supplement</b> |                                             |                                              |                                        |
|                    | 21kki xa'mo afirootana ikkiro mageeshi geeshsha afiroota?                      | 1. <input type="checkbox"/> less than month | 1. <input type="checkbox"/> 1 agani woro     | 1 <input type="checkbox"/> ከአንድ ወር በታች |
|                    | ደም የሚሞላ ዕንክብል ከወሰድሽ ለምን ያህል ጊዜ ነው የወሰድሽው?                                      | 2. <input type="checkbox"/> 1 up 2 month    | 2. <input type="checkbox"/> 1-2 agani geesha | 2. <input type="checkbox"/> 1-2ወር      |

**Household code**

**Anemia survey**

|  |  |                                                                                    |                                              |                                       |
|--|--|------------------------------------------------------------------------------------|----------------------------------------------|---------------------------------------|
|  |  | 3. <input type="checkbox"/> 2up3                                                   | 3. <input type="checkbox"/> 2-3 agani geesha | 3. <input type="checkbox"/> ከ2-3 ወር   |
|  |  | 4. <input type="checkbox"/> more than 3 month                                      | 4. <input type="checkbox"/> 3 apani ale      | 4. <input type="checkbox"/> ከ3 ወር በላይ |
|  |  | 5. <input type="checkbox"/> for 6 month<br>6. <input type="checkbox"/> Do not know | 5. <input type="checkbox"/> 6 adani geesha   | 5. <input type="checkbox"/> ለ6ወር      |
|  |  |                                                                                    | 6. <input type="checkbox"/> Diafooma         | 6. <input type="checkbox"/> ዐላውቅም     |

**Part 7. Baby health question**

Kifile 7 Daaimu fayimu xa'mu

ክፍል 7 የህፃኑን ጤና የሚገልፅ መጠይቅ

Now I am going to ask you questions which are related to your baby's health

Xa xa'meemohehu daa'mu fayima ledo xedooshu noo xa'mooti

ሁሁን የህፃኑን ዐጠቃላይ የጤና ሁኔታ የሚገልጽ ጥያቄ ዕጠይቅሻለሁ

|     | QUESTION                                                                                        |                                 | CODE                               |                                  |
|-----|-------------------------------------------------------------------------------------------------|---------------------------------|------------------------------------|----------------------------------|
| 701 | <b>Does the child vaccinated ?</b>                                                              |                                 |                                    |                                  |
|     | Daaimu kittibaate garunni gudino?                                                               | 0. <input type="checkbox"/> No  | 0. <input type="checkbox"/> Dee'ni | 0. <input type="checkbox"/> አይ   |
|     | ህፃኑ ከትባት ወስዷል?                                                                                  | 1. <input type="checkbox"/> Yes | 1. <input type="checkbox"/> Eewa   | 1. <input type="checkbox"/> አዎ   |
| 702 | <b>Does the child had vaccine card?</b>                                                         |                                 |                                    |                                  |
|     | Kittibaate gudino kaarde noosi?                                                                 | 0. <input type="checkbox"/> No  | 0. <input type="checkbox"/> Dee'ni | 0. <input type="checkbox"/> አይ   |
|     | ህፃኑ የከትባት ካርድ አለው?                                                                              | 1. <input type="checkbox"/> Yes | 1. <input type="checkbox"/> Eewa   | 1. <input type="checkbox"/> አዎ   |
|     | <b>Could you show me vaccine card (please find which vaccine the child take from the card?)</b> |                                 |                                    |                                  |
| 705 | BCG kitibaate dasirino anga lea hasireemona lao?                                                | <input type="checkbox"/> BCG?   | <input type="checkbox"/> BCG?      | <input type="checkbox"/> የሳንባ ምች |

**Household code**

**Anemia survey**

|     |                                                              |                                                 |                                                   |                                      |
|-----|--------------------------------------------------------------|-------------------------------------------------|---------------------------------------------------|--------------------------------------|
|     | Dasirinoḥu qinniticho angara dasahootic?                     | <input type="checkbox"/> Polio 0?               | <input type="checkbox"/> Polio 0?                 | <input type="checkbox"/> የህፃናት ልምሻ 0 |
|     |                                                              | <input type="checkbox"/> Polio1?                | <input type="checkbox"/> Polio1?                  | <input type="checkbox"/> የህፃናት ልምሻ 1 |
|     | የከትባቱን ካ ርድ ታሳዩኛለሽ (በከትባት ካርድ ላይ የወሰደውን X ያልወሰደውን 0 አድርግ/ጊ ) | <input type="checkbox"/> Polio2?                | <input type="checkbox"/> Polio2?                  | <input type="checkbox"/> የህፃናት ልምሻ 2 |
|     |                                                              | <input type="checkbox"/> Polio3?                | <input type="checkbox"/> Polio3?                  | <input type="checkbox"/> የህፃናት ልምሻ 3 |
|     |                                                              | <input type="checkbox"/> DPT- 1                 | <input type="checkbox"/> DPT- 1                   | <input type="checkbox"/> ዲፕቲ 1       |
|     |                                                              | <input type="checkbox"/> DPT- 2                 | <input type="checkbox"/> DPT- 2                   | <input type="checkbox"/> ዲፕቲ 2       |
|     |                                                              | <input type="checkbox"/> DPT- 3                 | <input type="checkbox"/> DPT- 3                   | <input type="checkbox"/> ዲፕቲ 3       |
|     |                                                              | <input type="checkbox"/> PCV1                   | <input type="checkbox"/> PCV1                     | <input type="checkbox"/> ፕሲ ሺ.1      |
|     |                                                              | <input type="checkbox"/> PCV2?                  | <input type="checkbox"/> PCV2?                    | <input type="checkbox"/> ፕሲ ሺ. 2     |
|     |                                                              | <input type="checkbox"/> PCV3?                  | <input type="checkbox"/> PCV3?                    | <input type="checkbox"/> ፕሲ.ሺ.3      |
|     |                                                              | <input type="checkbox"/> Rota1?                 | <input type="checkbox"/> Rota1?                   | <input type="checkbox"/> ሮታ 1        |
|     |                                                              | <input type="checkbox"/> Rota2?                 | <input type="checkbox"/> Rota2?                   | <input type="checkbox"/> ሮታ 2        |
|     |                                                              | <input type="checkbox"/> Measealse              | <input type="checkbox"/> Measealse                | <input type="checkbox"/> ኩፍኝ         |
|     | <b>Can I see the BCG scar please?</b>                        |                                                 |                                                   |                                      |
| 703 | BCG kitibaate dasirino anga lea hasireemona lao?             | 1. <input type="checkbox"/> BCG lesion seen:    | 1. <input type="checkbox"/> BCG-bassa leellanno   | 1 የከትባቱ ጠባሳ ይታያል                     |
|     | Dasirinoḥu qinniticho angara dasahootic                      | 2. <input type="checkbox"/> BCG lesion not seen | 2. <input type="checkbox"/> BCG-bassu dileellanno | 2 የከትባቱ ጠባሳ አይታይም                    |
|     | የሳንባ ነቀርሳ ከትባት ቦታውን ማየት እቸላለው?                               |                                                 |                                                   |                                      |

**Part 7.2 Diarrhea,**

**Diarrhea episode two weeks recall**

**ክፍል 7.1:** ባለፉት 2 ሳምንታት ስለ ህፃኑ የተቆማጥ ህመም መጠይቅ

| QUESTION | Code |
|----------|------|
|----------|------|

**Household code**

**Anemia survey**

|                    |                                                                                             |              |              |             |
|--------------------|---------------------------------------------------------------------------------------------|--------------|--------------|-------------|
| 707                | <b>During the last two weeks that ended yesterday morning, did the child have diarrhea?</b> |              |              |             |
|                    | Sau leme lamalanni henafe bero soodo geeshsha deuu malaati noosi?                           | 0. [ ] No    | 0. [ ]Dinosi | 0. [ ]አይደለም |
|                    | ባለፉት 2 ሳምንታት ህፃኑ የተቆማጥ (የሆድ) በሽታ አሞት ነበር?                                                   | 1. [ ] Yes ↓ | 1. [ ]Noosi  | 1. [ ]አዎ    |
| 708<br>ዝለል<br>Skip | <b>Did the child pass any watery stools?</b>                                                |              |              |             |
|                    | Waa lawanno deiinoosi?                                                                      | 0. [ ] No    | 0. [ ]Dinosi | 0. [ ]አይደለም |
|                    | ህፃኑ ውሀ የሚመስል ተቆምጥ አስቀምጦታል                                                                   | 1. [ ] Yes↓  | 1. [ ]Noosi  | 1. [ ]አዎ    |

**Part 7.3: Pneumonia 2 Week recall**

**Kifille 7.3: Lemala mereero saambu michche xisso**

**ክፍል 7.3 ላለፉት 2 ሳምንታት የሳንባ ምች ህመምን የሚያመለክት መጠይቅ**

|                    | QUESTION                                                                                                       |           | CODE         |             |
|--------------------|----------------------------------------------------------------------------------------------------------------|-----------|--------------|-------------|
| 724                | <b>During the last two weeks that ended yesterday morning, did the child have cough?</b>                       |           |              |             |
|                    | Sau lame lemala kayisse be'ro soodo geeshsha, Daaimu Buusano Afirino?                                          | 0. [ ]No  | 0. [ ]Dinosi | 0. [ ]አይደለም |
|                    | ባለፉት 2 ሳምንታት ህፃኑ ሳል አሞት ነበር ?                                                                                  | 1. [ ]Yes | 1. [ ]Noosi  | 1. [ ]አዎን   |
|                    | <b>During the last two weeks that ended yesterday morning, did the child have fast or difficult breathing?</b> |           |              |             |
| 725<br>ዝለል<br>Skip | Sau lemala kayiise be'ro soodo geeshsha. Daaimu rahe rare fo'lanno woy foo'late rakkatanno?                    | 0. [ ]No  | 0. [ ]Dinosi | 0. [ ]አይደለም |
|                    | ላለፉት 2 ሳምንታት እስከ ትላንት ጠዋት ህፃኑ ትንፋሽ ያጥረው ነበር ?                                                                  | 1. [ ]Yes | 1. [ ]Noosi  | 1. [ ]አዎን   |
| 726                | <b>Did the illness interfere with the child ability to drink or eat?</b>                                       |           |              |             |

**Household code**

**Anemia survey**

|             |                                               |                                 |                                    |                                   |
|-------------|-----------------------------------------------|---------------------------------|------------------------------------|-----------------------------------|
| ዝለል<br>Skip | Xisso ittennona agannoki gede rakkatisannosi? | 0. <input type="checkbox"/> No  | 0. <input type="checkbox"/> Dinosi | 0. <input type="checkbox"/> አይደለም |
|             | የህመሙ ሁኔታ መብላትና መጠጣት ዕንዲያስቸግረው ዐድርጎበት ነበር?     | 1. <input type="checkbox"/> Yes | 1. <input type="checkbox"/> Noosi  | 1. <input type="checkbox"/> አዎን   |

**Part 7.4: Hospitalizations**

**Kiffile 7.4: Hospiitaalete goxinno yanna**

**ክፍል 7.4: የህፃኑ ሆስፒታል የመተኛት ሁኔታ**

|     | QUESTION                                              |                                   |                                    | CODE                              |
|-----|-------------------------------------------------------|-----------------------------------|------------------------------------|-----------------------------------|
| 729 | Since birth has ever been admitted to hospital?       |                                   |                                    |                                   |
|     | Daaimu ilami yanaa henafe hospiitaalete goxe egennino | 0. <input type="checkbox"/> No    | 0. <input type="checkbox"/> Dinosi | 0. <input type="checkbox"/> አይደለም |
|     | ህፃኑ ከተወለደ ጀምሮ ሆስፒታል ተኝቶ ያውቃል?                         | 1. <input type="checkbox"/> Yes ↓ | 1. <input type="checkbox"/> Noosi  | 1. <input type="checkbox"/> አዎን   |

**Part 9: Household Food Insecurity Access Scale (HFIAS) Measurement:**

**Now I would like to ask you few questions regarding your household food security situation in the past four weeks.**

**ክፍል 9 ላለፉት 4 ሳምንታት የቤተሰቡን የምግብ ዋስትና የሚያሳይ መጠይቅ**

| <p><b>Rule:</b> We, will not give "timing" instructions and force answers. Reported frequency in correct category according to this list:<br/>                 0. No/never,<br/>                 1. Sometimes: 1-2 days last month,<br/>                 2. Often: 3-10 days/month,<br/>                 3. Very often/usually: More than 10 days last month</p> |                                                                                              | <p>በሚከተለው ገለፃ መሰረት የዕናትየውን መልስ ዐስቀምጥ/ጩ</p> <p><input type="checkbox"/> 1ወ ይም 2 ጊዜ ላለፉት 4 ሳምንታት (ጥቂት ጊዜ)</p> <p><input type="checkbox"/> ከ3 -10 ጊዜ ላለፉት 4 ሳምንታት (ዐንዳንድ ጊዜ)</p> <p><input type="checkbox"/> ከ10 ጊዜ በላይ ላለፉት 4 ሳምንታት (ብዙ ጊዜ )</p> |                                    |                                   |
|------------------------------------------------------------------------------------------------------------------------------------------------------------------------------------------------------------------------------------------------------------------------------------------------------------------------------------------------------------------|----------------------------------------------------------------------------------------------|------------------------------------------------------------------------------------------------------------------------------------------------------------------------------------------------------------------------------------------------|------------------------------------|-----------------------------------|
| ተ/ቁ                                                                                                                                                                                                                                                                                                                                                              | ጥያቄ (questions)                                                                              |                                                                                                                                                                                                                                                |                                    |                                   |
| 901                                                                                                                                                                                                                                                                                                                                                              | <b>In the past four weeks, did you worry that your household would not have enough food?</b> |                                                                                                                                                                                                                                                |                                    |                                   |
|                                                                                                                                                                                                                                                                                                                                                                  | Sau shoole lamalara miniki manni ikkado sagala afirewokkhura qarranten egenootta             | 0. <input type="checkbox"/> No                                                                                                                                                                                                                 | 0. <input type="checkbox"/> Dee'ni | 0. <input type="checkbox"/> አይደለም |

**Household code**

**Anemia survey**

|                    |                                                                                                                                                  |                                                                                    |                                            |                                      |
|--------------------|--------------------------------------------------------------------------------------------------------------------------------------------------|------------------------------------------------------------------------------------|--------------------------------------------|--------------------------------------|
|                    | ባለፉት ዓመት ሳምንታት ለቤተሰብ በቂ ምግብ ካለመኖሩ የተነሳ ተጨንቀሽ ታውቋል                                                                                                | 1. <input type="checkbox"/> Yes                                                    | 1. <input type="checkbox"/> Eewa           | 1. <input type="checkbox"/> አዎን      |
|                    | <b>How often did this happen in the past four weeks?</b>                                                                                         |                                                                                    |                                            |                                      |
| 902<br>skip<br>ዝለል | Qarrante egendottara shoole lamala giddo mageeshshi yanna ikkanno                                                                                | <input type="checkbox"/> 1. Rarely (once or twice in the past four weeks)          | <input type="checkbox"/> 1. Harancho hanna | <input type="checkbox"/> 1. ጥቂት ጊዜ   |
|                    | ባለፉት 4 ሳምንታት ለምን ያህል ጊዜ ዐጋጠመሽ                                                                                                                    | <input type="checkbox"/> 2. Sometimes ( three to ten times in the past four weeks) | <input type="checkbox"/> 2. Sae sae        | <input type="checkbox"/> 2. ዐንጻንድ ጊዜ |
|                    |                                                                                                                                                  | <input type="checkbox"/> 3. Often (more than ten times the past four weeks)        | <input type="checkbox"/> 3. Seeda yanna    | <input type="checkbox"/> 3. ብዙ ጊዜ    |
|                    | <b>In the past four weeks, were you or any household member not able to eat the kinds of foods you preferred because of a lack of resources?</b> |                                                                                    |                                            |                                      |
| 903                | Sau shoole lamalara hidha hoogate kainohunni ati woy minikki maate sagala hasidhinoonni sagaletе dano ita hooggine egentinoonni                  | 0. <input type="checkbox"/> No                                                     | 0. <input type="checkbox"/> Dee'ni         | 0. <input type="checkbox"/> አይደለም    |
|                    | ባለፉት ዓመት ሳምንታት መግዛት ካለመቻል የተነሳ ዐንቺ ወይም ከቤተሰብ ጋር ባለት መብላት የፈለጋችሁትን የምግብ ዐይነት ሳትመገቡ ቀርታችሁ ታውቃላችሁ                                                   | 1. <input type="checkbox"/> Yes                                                    | 1. <input type="checkbox"/> Eewa           | 1. <input type="checkbox"/> አዎን      |
|                    | <b>How often did this happen in the past four weeks?</b>                                                                                         |                                                                                    |                                            |                                      |
| 904<br>Skip<br>ዝለል | Hoogginihunni mageeshshi barra ikkanno xaadenehu                                                                                                 | <input type="checkbox"/> 1. Rarely (once or twice in the past four weeks)          | <input type="checkbox"/> 1. Harancho hanna | <input type="checkbox"/> 1. ጥቂት ጊዜ   |
|                    | ባለፉት 4 ሳምንታት ለምን ያህል ጊዜ ዐጋጠመሽ                                                                                                                    | <input type="checkbox"/> 2. Sometimes ( three to ten times in the past four weeks) | <input type="checkbox"/> 2. Sae sae        | <input type="checkbox"/> 2. ዐንጻንድ ጊዜ |
|                    |                                                                                                                                                  | <input type="checkbox"/> 3. Often (more than ten times the past four weeks)        | <input type="checkbox"/> 3. Seeda          | <input type="checkbox"/> 3. ብዙ ጊዜ    |
|                    | <b>In the past four weeks, did you or any household member have to eat a limited variety of foods due to a lack of resources?</b>                |                                                                                    |                                            |                                      |
| 905                | Sau shoole lamala hoongunni kainohunni at way minikki maate mitte bikka callo sagaletе dana sagalinoonni                                         | 0. <input type="checkbox"/> No                                                     | 0. <input type="checkbox"/> Dee'ni         | 0. <input type="checkbox"/> አይደለም    |

**Household code**

**Anemia survey**

|                    |                                                                                                                                                                                         |                                                                                  |                                           |                                      |
|--------------------|-----------------------------------------------------------------------------------------------------------------------------------------------------------------------------------------|----------------------------------------------------------------------------------|-------------------------------------------|--------------------------------------|
|                    | ባለፉት ዓመት ሳምንታት መግዛት ካለመቻል የተነሳ ዐንቺ ወይም ከቤተሰብ ስርዓት ውስጥ ዐንድ ዐይነት ምግብ ብቻ ተመግባችሁ ታውቃላችሁ                                                                                                     | 1. <input type="checkbox"/> Yes                                                  | 1. <input type="checkbox"/> Eewa          | 1. <input type="checkbox"/> አዎን      |
| 906<br>Skip<br>ዝለል | <b>How often did this happen in the past four weeks?</b>                                                                                                                                |                                                                                  |                                           |                                      |
|                    | Ikkiro sau shoole lamalara mageeshshi geeshshooti                                                                                                                                       | <input type="checkbox"/> 1.Rarely (once or twice in the pastfour weeks)          | <input type="checkbox"/> 1.Harancho hanna | <input type="checkbox"/> 1.ጥቂት ጊዜ    |
|                    | ባለፉት 4 ሳምንታት ለምን ያህል ጊዜ ዐጋጠመሽ                                                                                                                                                           | <input type="checkbox"/> 2.Sometimes ( three to ten times inthe past four weeks) | <input type="checkbox"/> 2.Sae sae        | <input type="checkbox"/> 2. ዐንዳንድ ጊዜ |
|                    |                                                                                                                                                                                         | <input type="checkbox"/> 3.Often (more than ten times the past four weeks)       | <input type="checkbox"/> 3.Seeda          | <input type="checkbox"/> 3. ብዙ ጊዜ    |
| 907                | <b>In the past four weeks, did you or any household member have to eat some foods that you really did not want to eat because of a lack of resources to obtain other types of food?</b> |                                                                                  |                                           |                                      |
|                    | Sau shoole lamalara hoongunni kainohunni ati woy miniki manni giddo mittu ita hasidhinayikki sagalaittineegentinooni                                                                    | 0. <input type="checkbox"/> No                                                   | 0. <input type="checkbox"/> Dee'ni        | 0. <input type="checkbox"/> አይደለም    |
|                    | ባለፉት ዓመት ሳምንታት መግዛት ካለመቻል የተነሳ ዐንቺ ወይም ከቤተሰብ ስርዓት መብላት የማትፈልጉትን ምግብ በልታችሁ ታውቃላችሁ                                                                                                        | 1. <input type="checkbox"/> Yes                                                  | 1. <input type="checkbox"/> Eewa          | 1. <input type="checkbox"/> አዎን      |
| 908<br>Skip<br>ዝለል | <b>How often did this happen in the past four weeks?</b>                                                                                                                                |                                                                                  |                                           |                                      |
|                    | Kuni mageeshshi geeshshaatisau shoole lamalara ikkeuohu                                                                                                                                 | <input type="checkbox"/> 1.Rarely (once or twice in the pastfour weeks)          | <input type="checkbox"/> 1.Harancho hanna | <input type="checkbox"/> 1.ጥቂት ጊዜ    |
|                    | ባለፉት 4 ሳምንታት ለምን ያህል ጊዜ ዐጋጠመሽ                                                                                                                                                           | <input type="checkbox"/> 2.Sometimes ( three to ten times inthe past four weeks) | <input type="checkbox"/> 2.Sae sae        | <input type="checkbox"/> 2. ዐንዳንድ ጊዜ |
|                    |                                                                                                                                                                                         | <input type="checkbox"/> 3.Often (more than ten times the past four weeks)       | <input type="checkbox"/> 3.Seeda          | <input type="checkbox"/> 3. ብዙ ጊዜ    |
|                    | <b>In the past four weeks, did you or any household member have to eat a smaller meal than you felt youneeded because there was not enough food?</b>                                    |                                                                                  |                                           |                                      |
| 909                | Sau shoole lamalara atway minikki maate giddomitto ikkado sagala heera hoogatenni kainohunni shiima ikkado sagala sagalino                                                              | 0. <input type="checkbox"/> No                                                   | 0. <input type="checkbox"/> Dee'ni        | 0. <input type="checkbox"/> አይደለም    |

**Household code**

**Anemia survey**

|                    |                                                                                                                                                     |                                                                                    |                                            |                                      |
|--------------------|-----------------------------------------------------------------------------------------------------------------------------------------------------|------------------------------------------------------------------------------------|--------------------------------------------|--------------------------------------|
|                    | ባለፉት ዓመት ሳምንታት መግዛት ካለመቻል የተነሳ ዐንቺ ወይም ከቤተሰብሽ ዐባላት መብላት ከሚገባው መጠን በታች በልታችሁ ታውቃላችሁ                                                                  | 1. <input type="checkbox"/> Yes                                                    | 1. <input type="checkbox"/> Eewa           | 1. <input type="checkbox"/> አዎን      |
|                    | <b>How often did this happen in the past four weeks?</b>                                                                                            |                                                                                    |                                            |                                      |
| 910<br>Skip<br>ዝለል | Sagalino sau shoole lamalara mageshshi yanna geeshshati xaadinohu                                                                                   | <input type="checkbox"/> 1. Rarely (once or twice in the past four weeks)          | <input type="checkbox"/> 1. Harancho hanna | <input type="checkbox"/> 1. ጥቂት ጊዜ   |
|                    | ባለፉት 4 ሳምንታት ለምን ያህል ጊዜ ዐጋጠመሽ                                                                                                                       | <input type="checkbox"/> 2. Sometimes ( three to ten times in the past four weeks) | <input type="checkbox"/> 2. Sae sae        | <input type="checkbox"/> 2. ዐንዳንድ ጊዜ |
|                    |                                                                                                                                                     | <input type="checkbox"/> 3. Often (more than ten times the past four weeks)        | <input type="checkbox"/> 3. Seeda          | <input type="checkbox"/> 3. ብዙ ጊዜ    |
|                    | <b>In the past four weeks, did you or any other household member have to eat fewer meals in a day because there was not enough food?</b>            |                                                                                    |                                            |                                      |
| 911                | Sau shoole lamalara ikkado sagale heera hoogatenni kainohunni at woy minikkki maate giddo mittu barru giddo sagala noosi yanna sagalinokki yanna no | 0. <input type="checkbox"/> No                                                     | 0. <input type="checkbox"/> Dee'ni         | 0. <input type="checkbox"/> አይደለም    |
|                    | ባለፉት 4 ሳምንታት በቂ ምግብ ካለመኖሩ የተነሳ ዐንቺ/ከቤተሰብሽ መካከል ምብላት ባለበት ሰዎች ያልተመገበ ዐለ                                                                              | 1. <input type="checkbox"/> Yes                                                    | 1. <input type="checkbox"/> Eewa           | 1. <input type="checkbox"/> አዎን      |
|                    | <b>How often did this happen in the past four weeks?</b>                                                                                            |                                                                                    |                                            |                                      |
| 912<br>Skip<br>ዝለል | Sau lamalara mee yanna geeshshaati xaadinonehu                                                                                                      | <input type="checkbox"/> 1. Rarely (once or twice in the past four weeks)          | <input type="checkbox"/> 1. Harancho hanna | <input type="checkbox"/> 1. ጥቂት ጊዜ   |
|                    | ባለፉት 4 ሳምንታት ለምን ያህል ጊዜ ዐጋጠመሽ                                                                                                                       | <input type="checkbox"/> 2. Sometimes ( three to ten times in the past four weeks) | <input type="checkbox"/> 2. Sae sae        | <input type="checkbox"/> 2. ዐንዳንድ ጊዜ |
|                    |                                                                                                                                                     | <input type="checkbox"/> 3. Often (more than ten times the past four weeks)        | <input type="checkbox"/> 3. Seeda          | <input type="checkbox"/> 3. ብዙ ጊዜ    |
|                    | <b>In the past four weeks, was there ever no food to eat of any kind in your household because of lack of resources to get food?</b>                |                                                                                    |                                            |                                      |



**Household code**

**Anemia survey**

|                                                          |                                                                                                                                                    |                                                                                  |                                           |                                      |
|----------------------------------------------------------|----------------------------------------------------------------------------------------------------------------------------------------------------|----------------------------------------------------------------------------------|-------------------------------------------|--------------------------------------|
| 913                                                      | Sau lamalara anjetennikainohunni sagale minigiddo hooge epentewo                                                                                   | 0. <input type="checkbox"/> No                                                   | 0. <input type="checkbox"/> Dee'ni        | 0. <input type="checkbox"/> አይደለም    |
|                                                          | ባለፉት 4 ሳምንታት መግዛት ካለመቻል የተነሳ ማንኛውም ዐይነት ምግብ ከቤትሽ ጠፍቶ ያውቃል                                                                                          | 1. <input type="checkbox"/> Yes                                                  | 1. <input type="checkbox"/> Eewa          | 1. <input type="checkbox"/> አዎን      |
| <b>How often did this happen in the past four weeks?</b> |                                                                                                                                                    |                                                                                  |                                           |                                      |
| 914                                                      | Ikkiromageshshi yanna geeshshaati                                                                                                                  | <input type="checkbox"/> 1.Rarely (once or twice in the pastfour weeks)          | <input type="checkbox"/> 1.Harancho hanna | <input type="checkbox"/> 1.ጥቂት ጊዜ    |
| ዝለል                                                      | ባለፉት 4 ሳምንታት ለምን ያህል ጊዜ ዐጋጠመሽ                                                                                                                      | <input type="checkbox"/> 2.Sometimes ( three to ten times inthe past four weeks) | <input type="checkbox"/> 2.Sae sae        | <input type="checkbox"/> 2. ዐንዳንድ ጊዜ |
|                                                          |                                                                                                                                                    | <input type="checkbox"/> 3.Often (more than ten times the past four weeks)       | <input type="checkbox"/> 3.Seeda          | <input type="checkbox"/> 3. ብዙ ጊዜ    |
| 915                                                      | <b>In the past four weeks, did you or any household member go to sleep at night hungry because there was not enough food?</b>                      |                                                                                  |                                           |                                      |
|                                                          | Sau shoole lamalara ati woy minnikki maate giddo mittu sagalete anjoninni kainohunni hudiisannassi gaxinohu no                                     | 0. <input type="checkbox"/> No                                                   | 0. <input type="checkbox"/> Dee'ni        | 0. <input type="checkbox"/> አይደለም    |
|                                                          | ባለፉት 4 ሳምንታት ዐንቺ/ከቤተሰብሽ መካከል ከምግብ ዕጥረት የተነሳ ዕየራብው ሳይበላ የተኛ ዐለ                                                                                      | 1. <input type="checkbox"/> Yes                                                  | 1. <input type="checkbox"/> Eewa          | 1. <input type="checkbox"/> አዎን      |
| <b>How often did this happen in the past four weeks?</b> |                                                                                                                                                    |                                                                                  |                                           |                                      |
| 916<br>Skip<br>ዝለል                                       | Ikkiro mageeshshi yanna geeshshaati sau shoole lamalara                                                                                            | <input type="checkbox"/> 1.Rarely (once or twice in the pastfour weeks)          | <input type="checkbox"/> 1.Harancho hanna | <input type="checkbox"/> 1.ጥቂት ጊዜ    |
|                                                          | ባለፉት 4 ሳምንታት ለምን ያህል ጊዜ ዐጋጠመሽ                                                                                                                      | <input type="checkbox"/> 2.Sometimes ( three to ten times inthe past four weeks) | <input type="checkbox"/> 2.Sae sae        | <input type="checkbox"/> 2. ዐንዳንድ ጊዜ |
|                                                          |                                                                                                                                                    | <input type="checkbox"/> 3.Often (more than ten times the past four weeks)       | <input type="checkbox"/> 3.Seeda          | <input type="checkbox"/> 3. ብዙ ጊዜ    |
| 917                                                      | <b>In the past four weeks, did you or any household member go a whole day and night without eating anything because there was not enough food?</b> |                                                                                  |                                           |                                      |

**Household code**

**Anemia survey**

|                    |                                                                                                                        |                                                                                  |                                                               |                                                       |
|--------------------|------------------------------------------------------------------------------------------------------------------------|----------------------------------------------------------------------------------|---------------------------------------------------------------|-------------------------------------------------------|
|                    | Sau shoole lamalara at way minikki maate giddo mittu sagaleta anjenni kainohunni sagalikkinni 24 saate keeshshinohu no | 0. <input type="checkbox"/> No                                                   | 0. <input type="checkbox"/> Dee'ni                            | 0. <input type="checkbox"/> አይደለም                     |
|                    | ባለፉት 4 ሳምንታት ወይም/ከቤተሰብሽ መካከል ከምግብ ዕጥረት የተነሳ ሳይመገብ 24 ሰዎች የቆየ ዐለ                                                        | 1. <input type="checkbox"/> Yes                                                  | 1. <input type="checkbox"/> Eewa                              | 1. <input type="checkbox"/> አዎን                       |
|                    |                                                                                                                        |                                                                                  |                                                               |                                                       |
| 918<br>Skip<br>ዝለል | <b>How often did this happen in the past four weeks?</b>                                                               |                                                                                  |                                                               |                                                       |
|                    | Ikkiro mageeshshi yanna geeshshaati kalaqaminohu                                                                       | <input type="checkbox"/> 1.Rarely (once or twice in the pastfour weeks)          | <input type="checkbox"/> 1.Harancho hanna                     | <input type="checkbox"/> 1.ጥቂት ጊዜ                     |
|                    | ባለፉት 4 ሳምንታት ለምን ያህል ጊዜ ነው ያጋጠመሽ                                                                                       | <input type="checkbox"/> 2.Sometimes ( three to ten times inthe past four weeks) | <input type="checkbox"/> 2.Sae sae                            | <input type="checkbox"/> 2. ዐንዳንድ ጊዜ                  |
|                    |                                                                                                                        | <input type="checkbox"/> 3.Often (more than ten times the past four weeks)       | <input type="checkbox"/> 3.Seeda                              | <input type="checkbox"/> 3. ብዙ ጊዜ                     |
| 919                | <b>Have you received any food support in the past month?</b>                                                           |                                                                                  |                                                               |                                                       |
|                    | Sai aganira ayita sagaleta kaalo adhootta                                                                              | 0. <input type="checkbox"/> No                                                   | 0. <input type="checkbox"/> Dee'ni                            | 0. <input type="checkbox"/> አይደለም                     |
|                    | ባለፈው ወር ማንኛውም የምግብ ዕርዳታ ዐግኝተሻል                                                                                         | 1. <input type="checkbox"/> Yes                                                  | 1. <input type="checkbox"/> Eewa                              | 1. <input type="checkbox"/> አዎን                       |
| 920                | <b>How do you cope at times when you are running out of food in the house?</b>                                         |                                                                                  |                                                               |                                                       |
|                    | Sagala mini giddo heedhu kkinni gatturo maat assahahu                                                                  | 1[ <input type="checkbox"/> ].Reduce number of meals                             | 1[ <input type="checkbox"/> ]Adhaw sagaleaanoheayeajishe ena  | 1[ <input type="checkbox"/> ]የሚወሰደውን የምግብ ድግግሞሽ ቀንሳለሁ |
|                    | በቤት ውስጥ የምግብ ዕጥረት ሲያጋጥምሽ ምን ዐማራጭ ነው የምትወስኛው                                                                            | 2[ <input type="checkbox"/> ].Reduce meal size                                   | 2[ <input type="checkbox"/> ]Sagaleta geesha ajiplema         | 2[ <input type="checkbox"/> ]የምግብ መጠን ቀንሳለሁ           |
|                    |                                                                                                                        | 3[ <input type="checkbox"/> ].Borrowing                                          | 3[ <input type="checkbox"/> ]Liqiirema                        | 3[ <input type="checkbox"/> ]ዕበደራለሁ                   |
|                    |                                                                                                                        | 4[ <input type="checkbox"/> ].Petty trade                                        | 4[ <input type="checkbox"/> ]Hirary sagale hasileme           | 4[ <input type="checkbox"/> ]የሚሸጥ ነገር ፈልጋለሁ           |
|                    |                                                                                                                        | 5[ <input type="checkbox"/> ].Consume stored food (seed)                         | 5[ <input type="checkbox"/> ]Gootam giddo nosagale harunsitmo | 5[ <input type="checkbox"/> ]በጎተራ ያለ ምግብ ዕጠቀማለሁ       |
|                    |                                                                                                                        | 6[ <input type="checkbox"/> ].Migration for labour                               | 6[ <input type="checkbox"/> ]Loosoho walekachcha horeema      | 6[ <input type="checkbox"/> ]ለስራ ወደ ሌላ ዐካባቢ ሔዳለሁ      |

**Household code**

**Anemia survey**

|  |  |                              |                          |                     |
|--|--|------------------------------|--------------------------|---------------------|
|  |  | 7[ ].Sell of farm tools      | 7[ ]Hwurayi udene hirana | 7[ ]የማረሻ ዕቃዎችን ሸጣለሁ |
|  |  | 8[ ].Sale charcoal/fire wood | 8[ ]Ishine hirema        | 8[ ]ቆሻሻ ሸጣለሁ        |
|  |  | 9[ ].Daily labor             | 9[ ]Barulooso losema     | 9[ ]የቀን ሥራ ሰራለሁ     |
|  |  | 10[ ].Safety Net             | 10[ ]Kaalo hasireema     | 10[ ]ዕርዳታ ዐገኛለሁ     |
|  |  | 11[ ].Sell of farm animals   | 11[ ]Ishine adhe itema   | 11[ ]ከቆሻሻ ወስጄ በላለሁ  |
|  |  | 12[ ].Other(specify)         | 12[ ]Welu noose keeli    | 12[ ]ሌላ ካለ ጥቀስ/ሽ    |
|  |  |                              |                          |                     |
|  |  |                              |                          |                     |

**Section 10: Household dietary diversity**

**Kiffile 10. Mini mate sagaletе danisagala**

ክፍል 10. የቤተሰቡ የምግብ ዐመጋገብ

**Now I would like to ask you about the types of foods that you or anyone else in your household ate yesterday during the day and at night either separately or combined with other foods.**

ቤተሰቡ በ 24 ሰዐት ውስጥ የተመገበውን የምግብ ዐይነት የሚገለፅ መጠይቅ (ቤተሰቡ ቁርስ፣ምሳ፣ዕራት የሰራውን ወይም የተመገበውን ምግብ ጠይቅ የሚስማማውን ቦታ ዐመልክት)

|      |                                                                                                                                |              |              |               |
|------|--------------------------------------------------------------------------------------------------------------------------------|--------------|--------------|---------------|
|      | <b>Were there any foods that were not prepared for the in the house because it was a fasting day?</b>                          |              |              |               |
| 1000 | Qatume ikkewo daafira loonsoyikki sagale no                                                                                    | 0. [ ]No     | 0. [ ]Dee'ni | 0. [ ]አይደለም   |
|      | ጸም ስለሆነ ያልተሰራ ምግብ ዐለ                                                                                                           | 1. [ ]Yes    | 1. [ ]Eewa   | 1. [ ]አዎን     |
| 1001 | <b>Could you tell me the types of foods that were prepared in the house and that you or anyone else in your household ate?</b> |              |              |               |
|      | Loonsoyi sagale kulatoe                                                                                                        | [ ]Breakfast |              | [ ]ቁርስ        |
|      | ለቤተሰቡ የተሰራውን የምግብ ጊዜ ትነግሯልሽ                                                                                                    | [ ]Lunch     |              | [ ]ምሳ         |
|      |                                                                                                                                | [ ]Dinner    |              | [ ]ዕራት        |
|      |                                                                                                                                | [ ]Others    |              | [ ]ሌላካለ ጥቀስ/ሽ |

**Household code**

**Anemia survey**

|      |                                                                                                                                                 |                                 |                                    |                                   |
|------|-------------------------------------------------------------------------------------------------------------------------------------------------|---------------------------------|------------------------------------|-----------------------------------|
| 1002 | <b>Any bread, rice, pasta, biscuits, or any other foods made from millet, sorghum, maize, rice, wheat?</b>                                      |                                 |                                    |                                   |
|      | Daabbo,paarta,ruuze,koshoro raino sagale woy ajjunni ,badalatenni ,hayixunni,qamadetenni,bashanqunniy loonsoonni sagale woy wolu quminni,xawisi | 0. <input type="checkbox"/> No  | 0. <input type="checkbox"/> Dee'ni | 0. <input type="checkbox"/> አይደለም |
|      | ዳቦ፣ ፖስታ፣ ሩዝ፣ ብሰኩት፣ ኩኪሰ፣ ወይም ማንኛውም ነገር ከአጃ ከባቆሎ ገብሰ፣ ሰንዴ፣ ማሸለ፣ ወይም ሌላ አህል ዘር የተሰራ                                                                | 1. <input type="checkbox"/> Yes | 1. <input type="checkbox"/> Eewa   | 1. <input type="checkbox"/> አዎን   |
| 1003 | <b>Any potatoes, bulla, kocho or any other food made from roots or tubers?</b>                                                                  |                                 |                                    |                                   |
|      | Maxaaxeesla, diinicha, boyina,lawinore saga'lino?                                                                                               | 0. <input type="checkbox"/> No  | 0. <input type="checkbox"/> Dee'ni | 0. <input type="checkbox"/> አይደለም |
|      | ማንኛውም ነጭ ድንች፣ ቦይና፣ እንሰት (ማንኛውም ነጭ ስራስር)                                                                                                         | 1. <input type="checkbox"/> Yes | 1. <input type="checkbox"/> Eewa   | 1. <input type="checkbox"/> አዎን   |
| 1004 | <b>Any vegetables?</b>                                                                                                                          |                                 |                                    |                                   |
|      | Wole aye ataakilte saga'lino?                                                                                                                   | 0. <input type="checkbox"/> No  | 0. <input type="checkbox"/> Dee'ni | 0. <input type="checkbox"/> አይደለም |
|      | ማንኛውም አታክልት                                                                                                                                     | 1. <input type="checkbox"/> Yes | 1. <input type="checkbox"/> Eewa   | 1. <input type="checkbox"/> አዎን   |
| 1005 | <b>Any fruits?</b>                                                                                                                              |                                 |                                    |                                   |
|      | Wole aye gumma                                                                                                                                  | 0. <input type="checkbox"/> No  | 0. <input type="checkbox"/> Dee'ni | 0. <input type="checkbox"/> አይደለም |
|      | ማንኛውም ፍራፍሬ                                                                                                                                      | 1. <input type="checkbox"/> Yes | 1. <input type="checkbox"/> Eewa   | 1. <input type="checkbox"/> አዎን   |
| 1006 | <b>Any beef, pork, lamb, goat, rabbit wild game, chicken, duck, or other birds, liver, kidney, heart, or other organ meats?</b>                 |                                 |                                    |                                   |
|      | Bootu,mancheemete,gereewo,mellenna hilleessa,Lukko,daakiyye, Afale,mule,wodana,woy wole godowu giddo malla?                                     | 0. <input type="checkbox"/> No  | 0. <input type="checkbox"/> Dee'ni | 0. <input type="checkbox"/> አይደለም |
|      | የቦሬ፣ የበግ/የፍየል የአሳማ,የጥንቸል ,ዶሮ፣ እርግብ/ወፍ (ጉብት፣ ኩላሊት፣ የልብ ወይም ማንኛውም የውስጥ ሰውነት ክፍል)                                                                  | 1. <input type="checkbox"/> Yes | 1. <input type="checkbox"/> Eewa   | 1. <input type="checkbox"/> አዎን   |
| 1007 | <b>Any eggs?</b>                                                                                                                                |                                 |                                    |                                   |
|      | Ayee quuphe                                                                                                                                     | 0. <input type="checkbox"/> No  | 0. <input type="checkbox"/> Dee'ni | 0. <input type="checkbox"/> አይደለም |
|      | ማንኛውም እንቁላል                                                                                                                                     | 1. <input type="checkbox"/> Yes | 1. <input type="checkbox"/> Eewa   | 1. <input type="checkbox"/> አዎን   |
| 1008 | <b>Any fresh or dried fish or shellfish?</b>                                                                                                    |                                 |                                    |                                   |
|      | Ayee qilxi'me                                                                                                                                   | 0. <input type="checkbox"/> No  | 0. <input type="checkbox"/> Dee'ni | 0. <input type="checkbox"/> አይደለም |
|      | ማንኛውም አሳና የአሳምርት                                                                                                                                | 1. <input type="checkbox"/> Yes | 1. <input type="checkbox"/> Eewa   | 1. <input type="checkbox"/> አዎን   |
| 1009 | <b>Any foods made from beans, peas, lentils, or nuts?</b>                                                                                       |                                 |                                    |                                   |

**Household code**

**Anemia survey**

|      |                                                                                               |                                 |                                    |                                   |
|------|-----------------------------------------------------------------------------------------------|---------------------------------|------------------------------------|-----------------------------------|
|      | Aye segale baqeluuni, atarunni ,qibaatete qumma shumburunni qixxeessinoonni sagale saga'lino? | 0. <input type="checkbox"/> No  | 0. <input type="checkbox"/> Dee'ni | 0. <input type="checkbox"/> አይደለም |
|      | ማንኛውም ምግብ ከ ባቂላ፣አተር፣ ምሰር ወይም ሌላ ጥራጥሬ                                                          | 1. <input type="checkbox"/> Yes | 1. <input type="checkbox"/> Eewa   | 1. <input type="checkbox"/> አዎን   |
|      | <b>Any cheese, yogurt, milk or other milk products?</b>                                       |                                 |                                    |                                   |
| 1010 | Ayibe/geinto saga'lino?                                                                       | 0. <input type="checkbox"/> No  | 0. <input type="checkbox"/> Dee'ni | 0. <input type="checkbox"/> አይደለም |
|      | ማንኛውም አይብ፣አርጎ፣ወተት ወይም ሌላ የወተት ምርቶች                                                            | 1. <input type="checkbox"/> Yes | 1. <input type="checkbox"/> Eewa   | 1. <input type="checkbox"/> አዎን   |
|      | <b>Any foods made with oil, fat, or butter?</b>                                               |                                 |                                    |                                   |
| 1011 | Zayitetenni woy buurumi loonsoonni sagala                                                     | 0. <input type="checkbox"/> No  | 0. <input type="checkbox"/> Dee'ni | 0. <input type="checkbox"/> አይደለም |
|      | በዘይት ወይም በቅቤ የተሰራ ምግብ                                                                         | 1. <input type="checkbox"/> Yes | 1. <input type="checkbox"/> Eewa   | 1. <input type="checkbox"/> አዎን   |
|      | <b>Any sugar or honey?</b>                                                                    |                                 |                                    |                                   |
| 1012 | ማንኛውም ስኩዋርና ማር                                                                                | 0. <input type="checkbox"/> No  | 0. <input type="checkbox"/> Dee'ni | 0. <input type="checkbox"/> አይደለም |
|      |                                                                                               | 1. <input type="checkbox"/> Yes | 1. <input type="checkbox"/> Eewa   | 1. <input type="checkbox"/> አዎን   |
|      | <b>Any other foods, such as condiments, coffee, tea?</b>                                      |                                 |                                    |                                   |
| 1013 | ቡናና ሻይ                                                                                        | 0. <input type="checkbox"/> No  | 0. <input type="checkbox"/> Dee'ni | 0. <input type="checkbox"/> አይደለም |
|      |                                                                                               | 1. <input type="checkbox"/> Yes | 1. <input type="checkbox"/> Eewa   | 1. <input type="checkbox"/> አዎን   |
|      | <b>Alchol drink</b>                                                                           |                                 |                                    |                                   |
| 1014 | Diribisanno ago (Birra, Xesiixella,Areqe                                                      | 0. <input type="checkbox"/> No  | 0. <input type="checkbox"/> Dee'ni | 0. <input type="checkbox"/> አይደለም |
|      | ዐልኮል መጠጦች (ቢራ፣ ዐረቄ፣ጠጅ፣ጠላ)                                                                     | 1. <input type="checkbox"/> Yes | 1. <input type="checkbox"/> Eewa   | 1. <input type="checkbox"/> አዎን   |
|      | <b>Others specify</b>                                                                         |                                 |                                    |                                   |
| 1015 | Welere                                                                                        |                                 |                                    |                                   |
|      | ሌላ ካለ ዘርዘር                                                                                    |                                 |                                    |                                   |
