# Supplementary material for: Iron deficiency anemia among children aged 2–5 years in southern Ethiopia: a community-based cross-sectional study
Source: PeerJ journal article supplement (doi:10.7717/peerj.11649), 2021-06-28
Supplement: STROBEChecklist_Appendix_S7.pdf [file STROBEChecklist_Appendix_S7.pdf]

## Iron deficiency anemia among children aged 2-5 years in southern Ethiopia: a community based cross-sectional study

### STROBE Statement—Checklist

|                              | Item No | Recommendation                                                                                                                                                                       | Page No                                                                     |
|------------------------------|---------|--------------------------------------------------------------------------------------------------------------------------------------------------------------------------------------|-----------------------------------------------------------------------------|
| <b>Title and abstract</b>    | 1       | (a) Indicate the study's design with a commonly used term in the title or the abstract                                                                                               | Title Page1                                                                 |
|                              |         | (b) Provide in the abstract an informative and balanced summary of what was done and what was found                                                                                  | Abstract Page 2                                                             |
| <b>Introduction</b>          |         |                                                                                                                                                                                      |                                                                             |
| Background/rationale         | 2       | Explain the scientific background and rationale for the investigation being reported                                                                                                 | Page 4                                                                      |
| Objectives                   | 3       | State specific objectives, including any pre-specified hypotheses                                                                                                                    | Page4                                                                       |
| <b>Methods</b>               |         |                                                                                                                                                                                      |                                                                             |
| Study design                 | 4       | Present key elements of study design early in the paper                                                                                                                              | Page 5                                                                      |
| Setting                      | 5       | Describe the setting, locations, and relevant dates, including periods of recruitment, exposure, follow-up, and data collection                                                      | Page 5, study area                                                          |
| Participants                 | 6       | (a) Give the eligibility criteria, and the sources and methods of selection of participants                                                                                          | Page 6, study participants                                                  |
| Variables                    | 7       | Clearly define all outcomes, exposures, predictors, potential confounders, and effect modifiers. Give diagnostic criteria, if applicable                                             | Page 6, study variables                                                     |
| Data sources/<br>measurement | 8*      | For each variable of interest, give sources of data and details of methods of assessment (measurement). Describe comparability of assessment methods if there is more than one group | Page 6-10, blood collection and laboratory, anthropometry and questionnaire |
| Bias                         | 9       | Describe any efforts to address potential sources of bias                                                                                                                            | Page 11-12, Data quality and control                                        |
| Study size                   | 10      | Explain how the study size was arrived at                                                                                                                                            | Page 5-6 sample size and Fig S1                                             |
| Quantitative variables       | 11      | Explain how quantitative variables were handled in the analyses. If applicable, describe which groupings were chosen and why                                                         | Page 10-11, statistical analysis                                            |
| Statistical methods          | 12      | (a) Describe all statistical methods, including those used to control for confounding                                                                                                | Page 10-11 statistical analysis and Figure2                                 |
|                              |         | (b) Describe any methods used to examine subgroups and interactions                                                                                                                  | NA                                                                          |
|                              |         | (c) Explain how missing data were addressed                                                                                                                                          | NA                                                                          |

|                          |     |                                                                                                                                                                                                              |                                                                                                  |
|--------------------------|-----|--------------------------------------------------------------------------------------------------------------------------------------------------------------------------------------------------------------|--------------------------------------------------------------------------------------------------|
|                          |     | (d) If applicable, describe analytical methods taking account of sampling strategy                                                                                                                           | NA                                                                                               |
|                          |     | (e) Describe any sensitivity analyses                                                                                                                                                                        | NA                                                                                               |
| <b>Results</b>           |     |                                                                                                                                                                                                              |                                                                                                  |
| Participants             | 13* | (a) Report numbers of individuals at each stage of study—eg numbers potentially eligible, examined for eligibility, confirmed eligible, included in the study, completing follow-up, and analysed            | Page 12                                                                                          |
|                          |     | (b) Give reasons for non-participation at each stage                                                                                                                                                         | NA                                                                                               |
|                          |     | (c) Consider use of a flow diagram                                                                                                                                                                           | NA                                                                                               |
| Descriptive data         | 14* | (a) Give characteristics of study participants (eg demographic, clinical, social) and information on exposures and potential confounders                                                                     | Page 12-14, Child characteristics and Socio demographic characteristics of mother and households |
|                          |     | (b) Indicate number of participants with missing data for each variable of interest                                                                                                                          | Page (Table 1,2 and 3)                                                                           |
| Outcome data             | 15* | Report numbers of outcome events or summary measures                                                                                                                                                         | Page 12-13 Table 5 and 6.                                                                        |
| Main results             | 16  | (a) Give unadjusted estimates and, if applicable, confounder-adjusted estimates and their precision (eg, 95% confidence interval). Make clear which confounders were adjusted for and why they were included | Page 13, (Table 6).                                                                              |
|                          |     | (b) Report category boundaries when continuous variables were categorized                                                                                                                                    | NA                                                                                               |
|                          |     | (c) If relevant, consider translating estimates of relative risk into absolute risk for a meaningful time period                                                                                             | NA                                                                                               |
| Other analyses           | 17  | Report other analyses done—eg analyses of subgroups and interactions, and sensitivity analyses                                                                                                               | NA                                                                                               |
| <b>Discussion</b>        |     |                                                                                                                                                                                                              |                                                                                                  |
| Key results              | 18  | Summarise key results with reference to study objectives                                                                                                                                                     | Page 14, discussion                                                                              |
| Limitations              | 19  | Discuss limitations of the study, taking into account sources of potential bias or imprecision. Discuss both direction and magnitude of any potential bias                                                   | Page 15-16, discussion                                                                           |
| Interpretation           | 20  | Give a cautious overall interpretation of results considering objectives, limitations, multiplicity of analyses, results from similar studies, and other relevant evidence                                   | Page 16                                                                                          |
| Generalisability         | 21  | Discuss the generalisability (external validity) of the study results                                                                                                                                        | Page 16, conclusion                                                                              |
| <b>Other information</b> |     |                                                                                                                                                                                                              |                                                                                                  |
| Funding                  | 22  | Give the source of funding and the role of the funders for the present study and, if applicable, for the original study on which the present article is                                                      |                                                                                                  |

|       |  |
|-------|--|
| based |  |
|-------|--|
