# Supplementary material for: Iron deficiency anemia among children aged 2–5 years in southern Ethiopia: a community-based cross-sectional study
Source: PeerJ. 2021 Jun 28;9:e11649. doi: 10.7717/peerj.11649 (PMC8247708; doi:10.7717/peerj.11649)
Supplement: Supplemental Information 4 [file peerj-09-11649-s004.xlsx]

## Sheet: Sheet1
MOAGE104	SEXCH105	agemonth	EDUMO109	EDUFA110	HHSIZ111	OCCUM201	OCCUF202	HHINPM20	ELECT206	RADIO206	TELEPH20	TELEV206	REFRE206	STOVE206	COMPU206	BICYCLE2	MOBIKE20	CAR206J	OTHER206	HHLAND20	DOMEAN21	LATRNTYP	WATERSOU	BRMFEDNG	MEALFREQ	PORRIDGE	CERIAL40	TEFF404	WHTROOT4	PULSES40	PEANUT40	OIL408	GRVEG409	YELWROT4	MANGO411	FRUVEG41	FORTIFD4	MILKP414	MILK415	EGG416	ORGMET41	AMEAT418	CHICKEN4	FISH420	SOFTDRI4	COFFE422	ALCHOL42	OTHER424	FFINST50
27	female	48	7	11	5	unemployed	Murchant	20000	yes	no	no	yes	no	yes	no	no	yes	yes	no	yes	No	covered pit latrine	piped in to dwelling	no	3	No	Yes	Yes	No	Yes	No	No	Yes	No	No	No	No	No	Yes	No	No	Yes	No	No	Yes	Yes	No	no	1
30	female	38	4	8	7	unemployed	Government	500	yes	no	no	no	no	no	no	no	no	no	no	yes	Yes	Open pit latrine	public tanker	no	3	No	Yes	Yes	No	Yes	No	No	Yes	No	No	No	No	No	No	No	No	No	No	No	No	No	No	no	0
27	male	36	5	9	7	unemployed	Government	600	yes	no	yes	yes	no	no	no	no	yes	no	no	yes	Yes	covered pit latrine	piped in to dwelling	yes	3	No	Yes	Yes	No	Yes	No	Yes	No	No	No	No	No	No	Yes	No	No	No	No	No	Yes	Yes	No	no	1
28	female	26	0	8	5	day laborer	Government	800	yes	yes	yes	no	no	no	no	no	yes	no	no	no	No	covered pit latrine	public tab	yes	5	No	Yes	No	Yes	Yes	No	No	No	No	Yes	No	No	No	No	No	No	No	No	No	No	Yes	No	no	0
30	female	56	0	0	6	unemployed	Day labourer	1500	yes	yes	yes	yes	no	no	no	no	no	no	no	no	No	ventilated pit latrine	public tab	no	3	No	Yes	Yes	No	Yes	No	Yes	No	No	No	Yes	No	No	No	No	No	No	No	No	No	No	No	no	0
30	female	58	4	8	9	unemployed	Murchant	1500	yes	yes	no	yes	no	no	no	no	yes	no	no	yes	Yes	Open pit latrine	piped in to dwelling	no	5	No	No	Yes	Yes	No	No	Yes	Yes	No	No	Yes	No	No	No	No	Yes	Yes	No	No	No	Yes	No	no	2
27	male	59	10	10	6	unemployed	Government	2000	yes	no	no	yes	no	no	no	no	no	no	no	no	Yes	covered pit latrine	public tanker	no	3	No	Yes	Yes	No	Yes	No	Yes	No	No	No	No	No	No	No	No	No	Yes	No	No	No	No	No	no	1
28	male	38	12	8	5	Murchant	Murchant	6000	yes	yes	yes	yes	yes	no	no	no	no	no	yes	no	No	9	public tab	no	2	Yes	Yes	Yes	Yes	No	No	Yes	No	Yes	No	Yes	No	No	Yes	Yes	No	Yes	Yes	No	No	Yes	No	no	1
24	male	40	10	15	3	day laborer	Day labourer	600	yes	yes	yes	yes	no	no	no	no	no	no	no	no	No	covered pit latrine	public tab	no	3	No	Yes	Yes	No	No	No	Yes	No	No	No	No	No	No	No	No	No	No	No	No	No	Yes	No	no	2
24	male	37	5	7	4	unemployed	Day labourer	1500	yes	no	yes	no	no	no	no	no	no	no	no	no	No	Open pit latrine	public tab	no	2	Yes	Yes	No	Yes	No	No	Yes	Yes	No	Yes	No	No	Yes	No	Yes	No	No	No	No	No	No	No	no	0
51	female	59	0	0	7	unemployed	#NULL!	500	yes	yes	yes	no	no	no	no	no	no	no	no	yes	Yes	covered pit latrine	public tab	no	3	No	Yes	Yes	No	No	No	Yes	No	No	No	No	No	No	No	No	No	Yes	No	No	Yes	Yes	Yes	no	1
30	male	59	0	0	6	unemployed	unemployed	0	yes	no	no	no	no	no	no	no	no	no	no	yes	No	No latrine	protected surface water	no	3	No	Yes	Yes	No	No	No	No	No	No	No	No	No	No	No	No	No	Yes	No	No	No	Yes	No	no	0
28	female	41	7	14	6	unemployed	Government	1000	yes	yes	yes	yes	no	no	no	no	yes	no	no	no	Yes	covered pit latrine	piped in to dwelling	no	4	No	Yes	Yes	No	Yes	No	Yes	No	No	No	Yes	Yes	Yes	Yes	No	No	No	No	No	Yes	Yes	No	no	0
26	female	24	6	0	2	day laborer	Day labourer	500	no	no	yes	no	no	no	no	no	no	no	no	no	No	Open pit latrine	public tab	yes	3	Yes	Yes	Yes	Yes	No	No	Yes	No	No	Yes	Yes	No	Yes	Yes	No	No	No	No	No	No	Yes	No	no	1
27	female	35	12	12	7	Government	Government	2200	yes	yes	yes	yes	no	yes	no	no	no	no	no	no	No	Open pit latrine	public tab	no	4	No	No	No	No	No	No	No	No	No	No	No	No	No	No	No	No	No	No	No	Yes	Yes	No	no	0
31	female	24	2	5	4	unemployed	Day labourer	1000	yes	yes	yes	yes	no	no	no	yes	no	no	no	no	No	Open pit latrine	piped in to dwelling	yes	3	No	No	No	No	No	No	Yes	No	No	No	No	No	No	No	No	No	No	No	No	No	No	No	no	0
30	male	36	4	8	6	unemployed	unemployed	0	yes	no	yes	no	no	no	no	yes	no	no	no	yes	Yes	covered pit latrine	piped in to dwelling	no	4	No	No	No	Yes	No	No	Yes	Yes	No	No	No	No	No	Yes	No	No	Yes	No	No	No	Yes	No	no	0
20	female	25	13	11	3	unemployed	Government	1700	yes	yes	yes	yes	no	no	no	no	no	no	no	no	No	covered pit latrine	public tab	yes	4	No	Yes	Yes	Yes	No	No	Yes	Yes	No	No	Yes	No	No	No	No	No	No	No	No	No	Yes	No	no	0
26	male	41	6	7	4	unemployed	Day labourer	1200	no	yes	yes	no	no	no	no	no	no	no	no	no	Yes	Open pit latrine	public tab	no	3	No	Yes	Yes	No	No	No	Yes	No	No	No	No	No	Yes	No	No	No	No	No	No	No	Yes	No	no	0
22	male	33	9	10	4	day laborer	Day labourer	1500	yes	no	yes	no	no	no	no	no	no	no	no	no	No	ventilated pit latrine	public tab	yes	2	No	No	Yes	Yes	No	No	Yes	No	No	No	No	No	No	No	Yes	No	No	No	No	No	Yes	No	no	2
22	male	43	3	4	8	day laborer	Farmer	600	yes	yes	yes	yes	no	no	no	no	no	no	no	no	Yes	Open pit latrine	public tab	no	2	Yes	Yes	Yes	No	No	No	Yes	Yes	No	No	No	No	Yes	Yes	No	No	No	No	No	No	Yes	No	no	2
32	female	52	0	4	7	Government	Day labourer	680	yes	no	no	no	no	no	no	no	no	no	no	no	No	Open pit latrine	public tab	no	3	No	Yes	Yes	Yes	No	Yes	Yes	No	No	No	No	No	No	No	No	No	No	No	No	No	Yes	No	no	2
22	male	39	4	8	5	unemployed	Government	1200	yes	yes	yes	yes	no	no	no	yes	no	no	no	no	No	covered pit latrine	public tab	no	3	Yes	Yes	Yes	No	Yes	Yes	Yes	No	No	Yes	No	No	No	No	No	No	No	No	No	No	No	No	no	0
25	male	46	7	7	6	unemployed	Day labourer	500	yes	yes	yes	no	no	no	no	no	no	no	no	no	No	Open pit latrine	public tab	no	3	No	Yes	Yes	Yes	No	No	Yes	Yes	No	No	No	No	No	No	No	No	No	No	No	No	Yes	No	no	1
25	female	36	3	0	4	Government	Day labourer	700	yes	no	no	no	no	no	no	no	no	no	no	no	No	Open pit latrine	public tab	no	3	Yes	Yes	Yes	No	No	No	Yes	Yes	No	Yes	No	No	No	Yes	Yes	No	No	No	No	No	Yes	No	no	3
22	female	44	10	12	5	NGO	Day labourer	1800	yes	no	yes	no	no	no	no	no	no	no	no	no	No	covered pit latrine	public tab	no	3	No	Yes	Yes	Yes	No	No	Yes	Yes	No	No	No	No	No	No	No	No	No	9	No	No	Yes	No	no	2
28	male	22	8	10	4	unemployed	Murchant	20000	yes	no	no	yes	yes	no	no	no	yes	no	no	yes	Yes	covered pit latrine	piped in to dwelling	yes	2	No	No	No	No	No	No	No	No	No	No	No	No	Yes	Yes	No	No	No	No	No	Yes	No	No	no	0
36	female	56	1	6	5	unemployed	Day labourer	500	no	no	no	no	no	no	no	no	no	no	no	no	No	No latrine	public tab	no	3	No	Yes	Yes	Yes	No	No	Yes	No	No	No	No	No	No	No	No	No	No	No	No	No	No	No	no	6
22	male	59	6	10	3	unemployed	Government	600	yes	yes	yes	no	no	no	no	no	no	no	no	no	No	ventilated pit latrine	piped in to dwelling	no	4	No	No	Yes	No	No	No	Yes	Yes	No	No	No	No	No	No	No	No	No	No	No	No	Yes	No	no	1
36	female	38	0	3	10	unemployed	NGO	700	yes	no	yes	yes	yes	yes	yes	yes	yes	yes	no	no	Yes	Open pit latrine	public tab	no	2	No	Yes	No	Yes	No	No	Yes	No	No	No	No	No	Yes	No	No	No	No	No	No	No	Yes	No	no	3
27	male	41	2	6	4	unemployed	Day labourer	800	yes	no	yes	no	no	no	no	no	no	no	no	no	No	Open pit latrine	public tab	no	3	No	Yes	No	Yes	No	No	Yes	Yes	No	No	No	No	No	No	No	No	No	No	No	No	Yes	No	no	2
38	female	33	0	8	9	day laborer	Government	1000	no	no	no	no	no	no	no	no	no	no	no	no	No	covered pit latrine	public tab	yes	4	No	Yes	No	No	No	No	Yes	No	No	No	No	No	No	No	No	No	No	No	No	No	Yes	No	no	1
23	female	59	10	7	4	unemployed	other	1800	no	no	no	no	no	no	no	no	no	no	no	no	No	covered pit latrine	piped in to dwelling	no	4	No	Yes	Yes	No	Yes	No	Yes	No	No	Yes	No	No	No	No	No	No	No	No	No	Yes	No	No	no	0
25	male	24	4	8	5	unemployed	Day labourer	1800	yes	yes	yes	yes	no	no	no	no	no	no	no	no	No	covered pit latrine	public tanker	yes	4	No	Yes	Yes	Yes	Yes	No	Yes	No	No	No	Yes	No	No	No	No	No	No	No	No	No	Yes	No	no	3
42	female	39	0	6	8	unemployed	NGO	200	yes	no	no	no	no	no	no	no	no	no	no	yes	Yes	Open pit latrine	public tab	yes	3	Yes	Yes	No	No	No	No	Yes	No	Yes	No	No	No	Yes	Yes	Yes	No	No	No	No	No	Yes	No	no	7
32	female	37	0	3	9	day laborer	Day labourer	800	yes	no	no	no	no	no	no	no	no	no	no	no	No	Open pit latrine	public tab	yes	4	No	Yes	Yes	Yes	No	No	Yes	No	No	No	No	No	No	No	No	No	No	No	No	No	Yes	No	no	2
30	female	36	0	3	8	unemployed	Day labourer	200	yes	yes	yes	no	no	no	no	no	no	no	no	no	No	Open pit latrine	public tab	yes	3	Yes	Yes	Yes	No	No	No	Yes	Yes	No	No	No	No	No	No	No	No	No	No	No	No	Yes	No	no	2
29	female	48	0	5	7	day laborer	Day labourer	800	yes	no	no	no	no	no	no	no	no	no	no	no	No	Open pit latrine	public tab	no	3	No	Yes	Yes	No	Yes	No	Yes	Yes	No	No	No	No	No	No	No	No	No	No	No	No	Yes	No	no	2
25	male	30	0	0	6	unemployed	Day labourer	800	no	no	yes	no	no	no	no	no	no	no	no	no	No	ventilated pit latrine	public tab	yes	4	No	Yes	Yes	No	No	No	Yes	No	No	Yes	Yes	No	No	No	No	No	Yes	No	No	No	Yes	No	no	0
27	female	29	8	6	3	day laborer	Day labourer	500	no	no	yes	no	no	no	no	no	no	no	no	no	No	covered pit latrine	public tab	yes	4	No	Yes	Yes	No	No	No	Yes	No	No	Yes	Yes	No	No	No	No	No	No	No	No	No	Yes	No	no	0
28	female	48	0	4	3	unemployed	Day labourer	500	yes	yes	no	no	no	no	no	no	no	no	no	no	No	Open pit latrine	public tab	no	3	No	Yes	Yes	Yes	Yes	No	No	No	No	Yes	No	No	No	No	No	No	No	No	No	No	Yes	No	no	2
27	female	25	6	8	4	day laborer	Government	700	yes	no	yes	no	no	no	no	no	no	no	no	no	No	covered pit latrine	public tab	yes	3	No	Yes	No	Yes	No	No	Yes	No	No	No	No	No	No	No	No	No	No	No	No	No	No	No	no	2
28	male	36	0	0	4	day laborer	Day labourer	700	no	no	no	no	no	no	no	no	no	no	no	no	No	Open pit latrine	protected surface water	no	4	No	Yes	Yes	Yes	No	No	Yes	No	No	Yes	No	No	No	No	No	No	No	No	No	No	Yes	No	no	3
34	female	30	0	0	9	unemployed	NGO	1600	yes	yes	no	no	no	no	no	no	no	no	no	no	Yes	covered pit latrine	public tab	yes	4	No	Yes	Yes	No	No	No	Yes	Yes	No	No	No	No	Yes	Yes	No	No	No	No	No	No	Yes	No	no	3
28	male	51	8	3	6	unemployed	Murchant	200	yes	no	no	yes	no	no	no	no	no	no	no	no	No	covered pit latrine	public tab	no	4	Yes	Yes	Yes	Yes	No	No	Yes	Yes	No	No	Yes	No	No	No	Yes	No	Yes	No	No	No	Yes	No	no	4
21	female	43	4	5	6	unemployed	NGO	500	yes	no	yes	no	no	no	no	no	yes	no	no	yes	Yes	Open pit latrine	public tab	no	3	No	Yes	No	No	No	No	Yes	No	No	No	No	No	Yes	No	No	No	No	No	No	No	Yes	No	no	2
24	female	38	0	0	4	unemployed	Day labourer	500	yes	no	no	no	no	no	no	no	no	no	no	no	No	Open pit latrine	public tanker	no	3	No	No	Yes	Yes	Yes	No	Yes	No	No	No	No	No	No	No	No	No	No	No	No	Yes	No	No	no	4
21	female	47	10	8	4	unemployed	Murchant	6000	yes	yes	yes	no	no	no	no	no	yes	no	no	yes	No	Open pit latrine	protected surface water	no	3	Yes	Yes	Yes	Yes	Yes	No	Yes	No	No	No	No	No	No	No	No	No	No	No	No	No	No	No	no	2
48	female	48	2	4	7	unemployed	Government	800	yes	yes	yes	yes	no	no	no	no	no	no	no	yes	Yes	Open pit latrine	public tab	no	3	Yes	Yes	No	Yes	No	No	Yes	No	No	No	No	No	Yes	Yes	No	No	No	No	No	No	Yes	No	no	2
28	male	55	2	4	9	unemployed	Murchant	2000	yes	yes	yes	yes	yes	no	no	yes	yes	no	no	yes	Yes	covered pit latrine	piped in to dwelling	no	4	No	Yes	Yes	Yes	Yes	Yes	Yes	Yes	No	No	Yes	No	No	No	No	No	No	No	No	No	Yes	No	no	3
30	female	35	4	6	5	unemployed	unemployed	0	yes	yes	yes	no	no	no	no	no	no	no	no	yes	No	No latrine	piped in to dwelling	no	3	No	Yes	Yes	Yes	Yes	No	Yes	Yes	No	No	No	No	No	No	No	No	No	No	No	No	Yes	No	no	1
30	female	44	0	0	5	unemployed	#NULL!	0	yes	no	yes	no	no	no	no	no	no	no	no	yes	No	Open pit latrine	public tab	no	3	No	Yes	No	No	No	No	No	No	No	No	No	No	No	No	No	No	No	No	No	No	Yes	No	no	7
20	female	20	6	9	3	unemployed	Murchant	100	no	no	no	no	no	no	no	no	no	no	no	no	No	Open pit latrine	public tab	yes	3	Yes	Yes	Yes	No	No	No	Yes	No	No	Yes	Yes	Yes	No	No	No	No	No	No	No	No	No	No	no	0
26	female	24	5	6	4	unemployed	Day labourer	400	no	no	yes	no	no	no	no	no	no	no	no	no	No	Open pit latrine	public tab	yes	3	Yes	Yes	No	No	No	No	Yes	No	No	Yes	No	No	No	No	No	No	No	No	No	No	No	No	no	1
28	female	31	0	3	7	unemployed	Day labourer	900	yes	no	no	no	no	no	no	no	no	no	no	no	No	Open pit latrine	public tab	yes	2	No	Yes	No	No	No	No	Yes	Yes	No	Yes	No	No	No	No	No	No	No	No	No	No	Yes	No	no	0
25	female	59	6	8	6	unemployed	Farmer	1000	yes	yes	no	yes	no	no	no	no	no	no	no	yes	No	Open pit latrine	piped in to dwelling	no	3	No	Yes	Yes	Yes	Yes	No	Yes	No	Yes	No	No	No	No	Yes	No	No	Yes	No	No	No	Yes	No	no	7
23	male	59	6	9	4	unemployed	Farmer	1000	yes	no	no	no	no	no	no	no	no	no	no	yes	Yes	Open pit latrine	public tanker	no	3	No	No	Yes	Yes	No	No	Yes	Yes	No	No	No	No	No	Yes	No	No	No	No	No	No	Yes	No	no	7
25	male	59	10	13	4	NGO	Farmer	1000	yes	yes	no	yes	no	no	no	no	no	no	no	yes	No	covered pit latrine	public tanker	no	3	No	Yes	No	Yes	No	No	Yes	Yes	No	No	No	No	No	No	No	No	No	No	No	No	No	No	no	0
25	male	36	10	10	4	unemployed	other	1200	yes	no	yes	yes	no	yes	no	no	no	no	no	yes	Yes	covered pit latrine	piped in to dwelling	no	4	Yes	Yes	Yes	Yes	Yes	No	Yes	No	No	No	No	No	No	No	No	No	No	No	No	No	Yes	No	no	2
46	male	46	0	2	8	unemployed	other	400	no	yes	yes	no	no	no	no	no	no	no	no	yes	Yes	Open pit latrine	public tab	no	3	Yes	Yes	Yes	No	No	No	Yes	Yes	No	No	No	No	No	No	No	No	No	No	No	No	No	No	no	1
25	male	30	7	10	2	day laborer	NGO	400	no	no	no	no	no	no	no	no	no	no	no	no	No	No latrine	public tab	yes	3	No	Yes	Yes	Yes	No	No	Yes	No	No	No	No	No	No	No	No	No	No	No	No	No	No	No	no	1
28	female	41	0	5	4	unemployed	Day labourer	550	yes	no	no	no	no	no	no	no	no	no	no	no	No	Open pit latrine	public tab	no	3	No	Yes	Yes	Yes	No	No	Yes	Yes	No	No	No	No	No	No	No	No	No	No	No	No	Yes	No	no	3
20	male	20	6	10	3	unemployed	NGO	2000	yes	yes	yes	no	no	no	no	no	yes	no	no	yes	Yes	covered pit latrine	public tab	yes	4	No	Yes	Yes	No	No	No	Yes	No	No	No	No	No	No	No	No	No	No	No	No	No	Yes	No	no	3
30	female	49	0	0	7	unemployed	Farmer	3000	yes	yes	no	no	no	no	no	no	no	no	no	yes	Yes	Open pit latrine	piped in to dwelling	no	3	Yes	Yes	No	No	Yes	No	Yes	Yes	No	No	No	No	No	Yes	No	No	No	No	No	No	Yes	No	no	4
25	female	51	10	13	4	unemployed	Government	800	yes	yes	no	no	no	no	no	no	no	no	no	no	No	ventilated pit latrine	public tab	no	3	No	Yes	Yes	No	No	Yes	Yes	No	No	Yes	Yes	No	Yes	No	No	No	Yes	No	No	No	Yes	No	no	1
40	female	38	16	14	5	Government	Murchant	8300	yes	yes	yes	yes	yes	yes	no	no	no	no	yes	no	No	ventilated pit latrine	public tab	no	5	Yes	Yes	Yes	Yes	Yes	Yes	Yes	Yes	No	Yes	Yes	No	Yes	Yes	No	No	Yes	No	No	Yes	Yes	No	no	5
25	female	36	0	0	6	unemployed	unemployed	0	no	no	no	no	no	no	no	no	no	no	no	yes	No	Open pit latrine	public tab	no	2	Yes	No	No	No	No	No	Yes	No	No	No	No	No	No	No	No	No	No	No	No	No	Yes	No	no	0
25	female	33	0	0	7	unemployed	unemployed	0	no	no	yes	no	no	no	no	yes	no	no	no	yes	Yes	Open pit latrine	public tanker	yes	3	No	Yes	No	No	No	No	No	No	No	No	No	No	No	No	No	No	No	No	No	No	No	No	no	0
30	female	20	6	3	5	unemployed	unemployed	0	yes	no	yes	no	no	no	no	no	no	no	no	no	No	Open pit latrine	public tab	yes	3	Yes	Yes	Yes	Yes	Yes	No	Yes	Yes	No	Yes	No	No	No	Yes	Yes	No	No	No	No	Yes	Yes	No	no	0
32	male	53	3	8	7	unemployed	Murchant	300	yes	yes	yes	no	no	no	no	no	no	no	no	yes	Yes	No latrine	public tab	no	3	No	Yes	Yes	Yes	No	No	Yes	No	No	No	No	No	No	Yes	No	No	No	No	No	No	Yes	No	no	2
25	female	40	5	10	2	day laborer	Day labourer	400	yes	yes	no	no	no	no	no	no	no	no	no	no	No	Open pit latrine	public tab	no	3	No	Yes	Yes	Yes	Yes	No	Yes	Yes	No	No	No	No	No	No	No	No	No	No	No	No	Yes	No	no	1
28	female	48	4	3	4	Government	Day labourer	800	yes	yes	yes	no	no	no	no	no	no	no	no	no	No	Open pit latrine	public tab	no	3	No	Yes	Yes	No	No	No	Yes	No	No	No	No	No	No	No	No	No	No	No	No	No	Yes	No	no	3
35	female	37	7	16	3	unemployed	Government	2000	yes	yes	yes	yes	no	yes	no	no	yes	no	no	no	No	Open pit latrine	public tab	yes	3	Yes	Yes	Yes	Yes	Yes	No	Yes	Yes	Yes	Yes	No	No	Yes	Yes	No	No	No	No	No	Yes	Yes	No	no	2
26	female	43	15	13	4	Government	Government	3000	yes	no	no	yes	no	no	no	no	no	no	no	yes	Yes	Open pit latrine	public tanker	no	2	No	Yes	Yes	Yes	Yes	No	Yes	Yes	Yes	No	Yes	No	No	No	No	No	No	No	No	Yes	Yes	No	no	1
22	male	27	8	8	4	Murchant	NGO	6000	yes	yes	yes	yes	yes	yes	no	no	yes	no	no	no	No	ventilated pit latrine	public tab	no	4	No	Yes	Yes	Yes	Yes	No	Yes	No	No	Yes	Yes	No	No	Yes	Yes	No	Yes	No	No	Yes	Yes	No	no	1
22	male	27	8	8	4	unemployed	Government	6000	yes	yes	yes	yes	yes	yes	no	no	no	no	no	no	No	ventilated pit latrine	public tab	no	4	No	Yes	Yes	Yes	Yes	No	Yes	No	No	Yes	Yes	No	No	Yes	Yes	No	Yes	No	No	Yes	Yes	No	no	1
30	female	54	0	4	6	Murchant	Farmer	100	yes	yes	yes	no	no	no	no	no	yes	no	no	no	Yes	Open pit latrine	unprotected surface water	no	2	No	Yes	Yes	No	No	No	Yes	Yes	No	No	Yes	No	No	No	No	No	No	No	No	No	No	No	no	1
29	female	48	6	9	6	unemployed	other	200	no	no	yes	no	no	no	no	no	no	no	no	yes	Yes	Open pit latrine	public tab	no	3	No	No	Yes	Yes	No	No	Yes	Yes	No	Yes	No	No	No	No	9	No	No	No	No	No	Yes	No	no	4
23	male	59	4	9	4	unemployed	Day labourer	300	no	no	no	no	no	no	no	no	no	no	no	no	No	Open pit latrine	public tab	no	3	No	Yes	Yes	Yes	No	No	Yes	Yes	No	Yes	No	No	No	No	No	No	No	No	No	No	Yes	No	no	0
40	female	38	3	8	8	unemployed	NGO	1000	no	no	yes	no	no	no	no	no	no	no	no	yes	Yes	ventilated pit latrine	public tab	no	3	Yes	Yes	Yes	No	No	No	Yes	Yes	No	Yes	Yes	No	No	No	No	No	No	No	No	No	Yes	No	no	7
22	male	26	7	8	3	unemployed	Day labourer	1200	yes	no	yes	no	no	no	no	no	no	no	no	no	No	covered pit latrine	piped in to dwelling	no	4	Yes	No	Yes	No	No	No	Yes	No	No	No	No	No	No	No	No	No	No	No	No	No	Yes	No	no	1
26	male	57	0	5	6	unemployed	Day labourer	1200	no	no	no	no	no	no	no	no	no	no	no	no	Yes	No latrine	public tab	no	3	No	Yes	No	Yes	No	No	No	Yes	No	No	No	No	No	No	No	No	No	No	No	No	Yes	No	no	0
35	female	35	2	8	7	Murchant	Day labourer	3000	yes	yes	yes	yes	no	yes	no	yes	no	no	no	no	No	ventilated pit latrine	public tab	no	2	No	No	Yes	No	No	No	Yes	Yes	No	No	Yes	No	No	No	No	No	No	No	No	No	No	No	no	1
24	male	41	8	16	5	Murchant	Government	3000	yes	yes	yes	no	no	no	no	no	no	no	no	no	No	covered pit latrine	public tab	yes	4	No	Yes	Yes	No	Yes	No	Yes	Yes	No	No	No	No	No	No	No	No	Yes	No	No	No	Yes	No	no	2
20	female	39	0	13	3	Murchant	Murchant	6000	yes	yes	yes	yes	no	no	no	no	no	no	no	no	No	ventilated pit latrine	public tab	yes	3	No	No	Yes	Yes	No	No	Yes	No	No	Yes	No	No	No	No	No	No	No	No	No	Yes	No	No	no	0
30	female	36	0	7	6	unemployed	unemployed	0	yes	no	yes	no	no	no	no	yes	no	no	no	no	Yes	Open pit latrine	public tab	no	4	No	No	Yes	Yes	Yes	No	Yes	Yes	No	No	No	No	No	No	No	No	No	No	No	No	Yes	No	no	3
30	female	44	0	0	5	unemployed	#NULL!	0	yes	no	yes	no	no	no	no	no	no	no	no	yes	No	Open pit latrine	public tab	no	2	No	Yes	No	No	No	No	No	No	No	No	No	No	No	No	No	No	No	No	No	No	Yes	No	no	7
30	male	24	10	8	7	day laborer	unemployed	300	yes	yes	yes	no	no	no	no	no	no	no	no	no	Yes	covered pit latrine	public tab	yes	2	No	Yes	Yes	Yes	No	No	Yes	No	No	No	Yes	No	No	No	No	No	Yes	No	No	No	Yes	No	no	2
38	male	37	0	5	10	unemployed	NGO	400	yes	yes	yes	yes	no	no	no	no	no	no	no	no	Yes	covered pit latrine	public tab	no	2	No	Yes	Yes	Yes	Yes	No	No	Yes	No	No	No	No	No	No	No	No	No	No	No	No	Yes	No	no	0
26	female	21	9	0	3	unemployed	Farmer	600	yes	yes	yes	no	no	no	no	no	no	no	no	yes	Yes	covered pit latrine	public tab	yes	4	Yes	Yes	No	No	No	No	Yes	No	No	Yes	No	No	Yes	No	No	No	No	No	No	No	No	No	no	3
35	male	40	0	0	10	unemployed	Farmer	600	yes	no	no	no	no	no	no	no	no	no	no	yes	Yes	Open pit latrine	public tab	no	3	No	Yes	No	No	No	No	No	Yes	No	No	Yes	No	No	No	No	No	No	No	No	Yes	Yes	No	no	0
30	female	48	3	8	6	day laborer	Murchant	600	yes	no	no	yes	no	no	no	no	no	no	no	no	No	Open pit latrine	public tab	no	4	No	Yes	Yes	No	Yes	No	Yes	No	No	No	No	No	No	No	No	No	No	No	No	No	Yes	No	no	0
28	female	54	0	0	4	unemployed	Day labourer	600	no	no	no	no	no	no	no	no	no	no	no	no	No	Open pit latrine	public tab	no	3	No	Yes	Yes	Yes	Yes	No	Yes	No	No	Yes	No	No	No	No	No	No	No	No	No	No	Yes	No	no	1
30	male	25	4	0	7	unemployed	Farmer	900	yes	yes	yes	yes	yes	yes	yes	yes	yes	yes	yes	yes	Yes	covered pit latrine	public tab	no	4	Yes	Yes	No	No	No	No	Yes	No	No	No	No	No	No	No	No	No	No	No	No	No	Yes	No	no	1
36	female	39	10	10	3	unemployed	NGO	1000	yes	yes	yes	yes	no	yes	no	no	no	no	no	yes	Yes	Open pit latrine	piped in to dwelling	no	3	No	No	Yes	No	No	No	Yes	No	No	No	No	No	No	No	No	No	No	No	No	No	No	No	no	1
35	female	49	7	8	7	unemployed	NGO	1000	yes	yes	yes	yes	no	no	no	no	yes	no	no	no	No	ventilated pit latrine	piped in to dwelling	yes	3	No	Yes	Yes	No	No	No	Yes	No	No	No	No	No	No	Yes	No	No	No	No	No	No	Yes	No	no	0
34	female	52	2	6	8	unemployed	Farmer	1000	yes	no	no	no	no	no	no	no	no	no	no	yes	Yes	covered pit latrine	public tab	no	4	No	No	Yes	No	No	No	Yes	No	No	No	No	No	Yes	Yes	No	No	No	No	No	No	Yes	No	no	5
29	female	35	10	10	7	unemployed	NGO	1000	yes	yes	no	yes	no	no	no	no	no	no	no	no	No	covered pit latrine	public tab	no	3	Yes	Yes	Yes	Yes	No	No	Yes	No	No	No	No	No	No	No	No	No	No	No	No	No	Yes	No	no	0
28	male	24	13	11	5	unemployed	NGO	1500	yes	yes	no	no	no	no	no	no	no	no	no	no	No	covered pit latrine	public tab	no	0	No	Yes	No	Yes	No	No	Yes	Yes	No	No	Yes	No	No	No	No	No	No	No	No	Yes	Yes	No	no	1
30	female	51	8	10	5	unemployed	Government	1500	yes	yes	yes	yes	yes	yes	no	no	no	no	no	yes	No	ventilated pit latrine	public tab	no	4	No	Yes	Yes	Yes	Yes	No	Yes	Yes	Yes	Yes	No	Yes	No	No	Yes	No	Yes	No	No	Yes	Yes	No	no	0
24	female	31	5	8	4	unemployed	other	2000	yes	yes	yes	no	no	no	no	no	no	no	no	yes	Yes	covered pit latrine	piped in to dwelling	yes	4	No	Yes	Yes	Yes	No	No	Yes	No	No	No	Yes	No	No	No	No	No	No	No	No	No	Yes	No	no	0
28	female	35	0	0	3	unemployed	Farmer	2000	yes	no	no	no	no	no	no	no	no	no	no	yes	Yes	covered pit latrine	piped in to dwelling	no	3	Yes	Yes	No	No	No	No	Yes	Yes	No	No	Yes	No	Yes	Yes	No	No	No	No	No	No	Yes	No	no	3
28	female	58	11	8	5	Murchant	NGO	2000	yes	yes	no	yes	no	no	no	no	no	no	no	no	No	covered pit latrine	piped in to dwelling	no	3	Yes	Yes	Yes	No	Yes	No	Yes	No	No	No	No	No	No	No	No	No	Yes	No	Yes	Yes	Yes	No	no	0
22	male	29	4	7	4	unemployed	Day labourer	2400	yes	yes	yes	yes	no	no	no	no	no	no	no	no	No	covered pit latrine	public tab	no	2	No	Yes	Yes	No	No	No	Yes	No	No	No	No	No	No	No	No	No	No	No	No	No	Yes	No	no	0
25	female	39	2	8	4	unemployed	Day labourer	6000	yes	yes	yes	yes	no	no	no	yes	no	no	no	no	Yes	ventilated pit latrine	public tab	no	4	No	No	Yes	No	Yes	No	Yes	Yes	Yes	No	Yes	No	No	No	No	No	No	No	No	No	Yes	No	no	0
32	male	46	16	18	5	unemployed	Government	10000	yes	yes	yes	yes	yes	yes	no	no	no	no	no	no	No	ventilated pit latrine	public tab	no	4	Yes	Yes	Yes	No	No	No	Yes	No	No	No	Yes	No	No	Yes	No	No	Yes	No	No	No	Yes	No	no	0
24	male	59	2	13	7	unemployed	Government	800	yes	no	yes	no	no	no	no	no	no	no	no	yes	Yes	Open pit latrine	public tanker	no	3	No	Yes	Yes	Yes	No	No	Yes	Yes	No	No	No	No	No	No	No	No	No	No	No	Yes	Yes	No	no	3
45	male	24	0	0	8	unemployed	unemployed	0	no	no	no	no	no	no	no	no	no	no	no	yes	Yes	covered pit latrine	piped in to dwelling	no	2	No	Yes	No	Yes	Yes	No	Yes	No	No	No	No	No	No	No	No	No	No	No	No	No	No	No	no	1
26	female	47	6	8	4	unemployed	Day labourer	600	yes	no	yes	no	no	no	no	no	no	no	no	no	Yes	Open pit latrine	public tab	no	2	No	Yes	Yes	No	Yes	No	Yes	No	No	No	Yes	No	No	No	No	No	No	No	No	No	Yes	No	no	4
23	male	49	6	0	4	unemployed	NGO	1200	yes	yes	yes	yes	no	no	no	no	no	no	no	no	No	ventilated pit latrine	public tab	no	2	No	No	Yes	No	Yes	No	Yes	No	No	No	No	Yes	No	No	No	No	No	No	No	No	Yes	No	no	0
26	female	41	10	10	4	NGO	NGO	2000	no	no	no	no	no	no	no	no	no	no	no	yes	Yes	Open pit latrine	public tab	no	3	Yes	Yes	No	Yes	No	No	Yes	No	No	No	No	No	No	Yes	No	No	No	No	No	No	Yes	No	no	1
32	male	40	16	16	5	unemployed	Government	10000	yes	yes	yes	yes	yes	yes	no	no	no	no	no	no	No	ventilated pit latrine	public tab	no	4	Yes	Yes	Yes	No	Yes	Yes	Yes	Yes	No	No	Yes	No	No	Yes	No	No	Yes	No	No	No	Yes	No	no	0
22	male	40	4	4	4	unemployed	NGO	400	yes	yes	yes	no	no	no	no	no	no	no	no	no	No	Open pit latrine	piped in to dwelling	yes	2	No	Yes	Yes	Yes	No	No	Yes	No	No	No	No	No	No	No	No	No	No	No	No	No	Yes	No	no	0
25	male	20	10	8	9	unemployed	Murchant	500	yes	no	yes	no	no	no	no	no	no	no	no	yes	Yes	Open pit latrine	public tab	yes	3	No	Yes	Yes	Yes	Yes	No	Yes	No	No	No	No	No	No	No	No	No	No	No	No	No	Yes	No	no	0
23	female	33	3	0	4	unemployed	Government	600	no	no	no	no	no	no	no	no	no	no	no	yes	No	covered pit latrine	public tab	yes	4	Yes	Yes	Yes	No	No	No	Yes	No	No	No	No	No	No	No	No	No	No	No	No	No	No	No	no	0
26	female	53	2	8	4	unemployed	other	1000	yes	yes	yes	no	no	no	no	no	no	no	no	yes	No	covered pit latrine	public tab	no	3	No	Yes	Yes	Yes	No	No	Yes	No	No	No	No	No	No	No	No	No	No	No	No	No	Yes	No	no	0
26	female	51	5	7	3	unemployed	Day labourer	2000	yes	no	no	no	no	no	no	no	no	no	no	yes	No	covered pit latrine	piped in to dwelling	no	3	Yes	Yes	Yes	Yes	No	No	Yes	No	No	Yes	No	No	No	No	No	No	No	No	No	Yes	Yes	No	no	3
20	female	20	10	10	3	unemployed	unemployed	0	no	no	yes	no	no	no	no	no	no	no	no	yes	Yes	covered pit latrine	public tab	yes	3	Yes	Yes	No	Yes	Yes	No	Yes	No	No	Yes	No	No	No	No	No	No	No	No	No	No	Yes	No	no	1
28	male	34	5	9	3	day laborer	#NULL!	300	yes	no	no	no	no	no	no	no	no	no	no	no	No	Open pit latrine	public tab	yes	3	No	Yes	No	No	No	No	Yes	No	No	No	No	No	Yes	No	No	No	No	No	No	No	Yes	No	no	1
27	female	42	2	0	5	day laborer	Day labourer	700	no	no	yes	no	no	no	no	no	no	no	no	no	Yes	Open pit latrine	public tab	no	4	No	Yes	No	Yes	Yes	No	Yes	No	No	No	No	No	No	No	No	No	No	No	No	No	Yes	No	no	1
25	female	30	3	8	3	unemployed	NGO	1000	yes	no	yes	no	no	no	no	no	no	no	no	yes	Yes	covered pit latrine	public tab	yes	3	No	Yes	No	Yes	No	No	Yes	Yes	No	Yes	Yes	No	Yes	Yes	No	No	No	No	No	No	Yes	No	no	2
28	female	48	8	8	4	unemployed	other	1000	yes	yes	yes	yes	no	no	no	no	no	no	no	no	No	covered pit latrine	public tab	no	2	No	Yes	Yes	Yes	No	No	Yes	No	No	No	No	No	Yes	No	No	No	No	No	No	No	Yes	No	no	4
20	male	50	10	13	3	unemployed	Government	1500	yes	yes	no	yes	no	no	no	no	no	no	no	no	Yes	covered pit latrine	public tanker	no	4	No	Yes	Yes	Yes	Yes	No	Yes	No	No	No	Yes	No	No	Yes	No	No	No	No	No	Yes	Yes	No	no	2
32	female	36	2	7	6	unemployed	Farmer	1667	yes	yes	yes	no	no	no	no	no	no	no	no	yes	Yes	covered pit latrine	public tab	no	4	Yes	Yes	Yes	Yes	No	No	Yes	Yes	No	No	Yes	No	No	No	No	No	Yes	No	No	No	Yes	No	no	3
22	female	25	6	8	3	Murchant	Day labourer	2000	no	no	yes	no	no	no	no	no	no	no	no	no	No	ventilated pit latrine	public tab	yes	2	No	Yes	Yes	Yes	No	No	Yes	No	Yes	Yes	No	No	No	No	Yes	No	No	No	No	No	No	No	no	0
28	female	20	7	7	4	unemployed	NGO	2400	yes	yes	yes	yes	no	no	no	no	no	no	no	no	No	Open pit latrine	piped in to dwelling	no	4	Yes	No	Yes	No	No	No	Yes	Yes	No	No	No	No	No	No	No	No	No	No	No	Yes	No	No	no	0
25	male	48	4	8	3	unemployed	Day labourer	2400	yes	no	yes	yes	no	no	no	no	no	no	no	no	No	Open pit latrine	piped in to dwelling	yes	3	No	Yes	Yes	No	Yes	No	Yes	No	No	Yes	Yes	No	No	Yes	No	No	Yes	No	No	Yes	Yes	No	no	0
23	female	40	1	6	5	unemployed	Day labourer	5400	yes	yes	yes	yes	no	yes	no	yes	no	no	no	no	Yes	ventilated pit latrine	public tab	yes	4	Yes	Yes	Yes	No	No	No	Yes	Yes	No	No	Yes	No	No	No	No	No	No	No	No	No	Yes	No	no	0
30	female	30	8	10	4	unemployed	Murchant	20000	yes	no	no	yes	yes	no	no	no	yes	no	no	yes	Yes	covered pit latrine	piped in to dwelling	no	3	No	Yes	Yes	Yes	Yes	No	No	Yes	Yes	Yes	Yes	No	Yes	No	No	No	No	Yes	Yes	Yes	No	No	no	0
27	male	48	0	0	7	unemployed	unemployed	0	no	no	no	no	no	no	no	no	no	no	no	no	No	Open pit latrine	public tab	no	3	No	No	Yes	No	Yes	No	No	Yes	Yes	No	No	No	No	No	No	No	No	No	No	No	No	No	no	1
38	male	52	0	6	8	unemployed	Farmer	200	yes	no	yes	no	no	no	no	no	no	no	no	no	No	covered pit latrine	public tab	no	4	Yes	Yes	Yes	No	No	No	Yes	Yes	No	Yes	Yes	No	No	No	No	No	No	No	No	No	Yes	No	no	2
42	male	37	0	2	5	unemployed	Day labourer	450	no	yes	yes	no	no	no	no	no	no	no	no	yes	Yes	No latrine	public tab	yes	3	No	Yes	Yes	No	No	No	Yes	No	No	No	No	No	No	No	No	No	No	No	No	No	No	No	no	0
32	male	25	7	8	4	unemployed	#NULL!	500	no	no	no	no	no	no	no	no	no	no	no	no	Yes	Open pit latrine	protected surface water	yes	2	No	Yes	No	Yes	No	No	Yes	Yes	No	No	No	No	No	No	No	No	No	No	No	No	Yes	No	no	1
35	male	43	0	4	7	unemployed	Day labourer	700	yes	yes	yes	no	no	no	no	no	no	no	no	yes	Yes	Open pit latrine	protected surface water	no	3	No	Yes	Yes	No	No	No	No	No	No	No	No	No	No	No	No	No	No	No	No	No	Yes	No	no	0
24	female	47	2	6	7	unemployed	other	700	yes	no	yes	yes	no	no	no	no	no	no	no	no	No	Open pit latrine	piped in to dwelling	no	2	No	No	Yes	No	No	No	Yes	Yes	Yes	Yes	Yes	No	No	No	No	No	No	No	No	No	No	No	no	1
22	male	27	11	10	3	unemployed	Government	900	yes	yes	yes	no	no	no	no	no	no	no	no	no	No	covered pit latrine	piped in to dwelling	yes	3	No	Yes	Yes	Yes	Yes	No	Yes	Yes	No	No	No	No	No	No	No	No	No	No	No	Yes	No	No	no	0
25	female	58	3	8	7	unemployed	Government	1000	yes	no	yes	yes	no	no	no	no	yes	no	no	yes	Yes	Open pit latrine	piped in to dwelling	no	3	No	No	Yes	No	No	No	Yes	No	No	No	No	No	No	No	No	No	No	No	No	No	Yes	Yes	no	1
28	female	58	9	7	5	unemployed	other	1000	yes	yes	yes	yes	no	no	no	no	no	no	no	no	Yes	covered pit latrine	piped in to dwelling	no	3	No	Yes	Yes	No	Yes	No	Yes	No	No	No	No	No	No	No	No	No	No	No	No	No	Yes	No	no	2
28	female	35	4	6	8	Murchant	Murchant	1000	yes	no	yes	yes	no	no	no	no	no	no	no	no	No	covered pit latrine	piped in to dwelling	no	4	No	Yes	Yes	Yes	No	No	Yes	No	No	No	No	No	No	No	No	No	No	No	No	Yes	Yes	No	no	2
26	male	36	16	17	7	Government	Government	1000	yes	yes	yes	yes	yes	no	yes	no	yes	no	no	no	No	covered pit latrine	public tab	no	3	Yes	Yes	No	Yes	Yes	No	Yes	Yes	Yes	No	Yes	No	Yes	No	Yes	No	No	No	No	No	Yes	No	no	1
24	male	30	8	6	4	unemployed	other	1500	yes	yes	yes	no	no	no	no	no	no	no	no	yes	No	covered pit latrine	public tab	yes	4	Yes	Yes	Yes	Yes	No	No	Yes	Yes	Yes	No	Yes	No	Yes	No	No	No	No	No	No	No	Yes	No	no	0
31	male	59	6	9	4	Other	Murchant	2000	yes	no	yes	yes	no	no	no	no	no	no	no	yes	No	covered pit latrine	piped in to dwelling	no	3	No	Yes	Yes	Yes	No	No	Yes	Yes	No	No	Yes	No	No	No	No	No	No	No	No	No	Yes	No	no	2
24	male	42	10	8	5	Murchant	Murchant	3000	yes	yes	yes	yes	no	no	no	no	no	no	no	no	No	covered pit latrine	public tab	no	3	No	Yes	Yes	No	Yes	No	Yes	No	No	No	No	No	No	No	No	No	No	No	No	No	Yes	No	no	0
23	female	52	5	6	3	Government	Day labourer	3500	yes	yes	yes	no	no	no	no	no	no	no	no	yes	No	covered pit latrine	public tab	no	2	No	No	Yes	No	No	No	Yes	No	No	No	No	No	No	No	No	No	No	No	No	No	Yes	No	no	2
32	male	28	10	16	9	unemployed	Government	5000	yes	yes	yes	yes	yes	yes	no	no	yes	no	no	yes	Yes	ventilated pit latrine	piped in to dwelling	no	5	Yes	Yes	Yes	No	No	No	Yes	No	No	No	Yes	Yes	Yes	No	No	No	Yes	No	No	No	Yes	No	no	2
20	female	38	7	10	3	unemployed	unemployed	0	no	no	yes	no	no	no	no	no	no	no	no	no	No	Open pit latrine	piped in to dwelling	no	3	No	Yes	No	Yes	No	No	Yes	No	No	No	Yes	No	No	No	No	No	No	No	No	No	Yes	No	no	1
32	male	53	5	0	8	unemployed	NGO	200	yes	no	no	no	no	no	no	no	no	no	no	yes	Yes	covered pit latrine	public tab	no	3	No	Yes	No	Yes	No	No	Yes	No	No	No	No	No	Yes	Yes	No	No	No	No	No	No	Yes	No	no	3
23	male	27	0	5	4	day laborer	Day labourer	500	no	no	no	no	no	no	no	no	no	no	no	yes	No	Open pit latrine	public tanker	yes	2	No	Yes	Yes	No	No	No	No	No	No	No	No	No	No	No	No	No	No	No	No	No	No	No	no	0
28	male	36	0	#NULL!	5	day laborer	Day labourer	500	no	no	no	no	no	no	no	no	no	no	no	no	No	Open pit latrine	public tab	no	3	No	Yes	Yes	Yes	No	No	Yes	Yes	No	Yes	No	No	Yes	No	No	No	No	No	No	No	Yes	No	no	1
30	female	59	9	8	4	unemployed	Government	600	no	no	yes	yes	no	no	no	yes	no	no	no	yes	Yes	covered pit latrine	piped in to dwelling	no	3	Yes	Yes	No	No	No	No	Yes	No	No	No	No	No	No	No	No	No	No	No	No	No	Yes	No	no	5
25	female	37	7	9	4	unemployed	NGO	600	yes	no	no	no	no	no	no	no	no	no	no	no	No	covered pit latrine	piped in to dwelling	yes	4	No	Yes	Yes	No	Yes	No	Yes	No	No	No	No	No	No	No	No	No	No	No	No	No	Yes	No	no	1
32	male	42	7	6	4	unemployed	Farmer	800	yes	yes	yes	no	no	no	no	yes	no	no	no	yes	Yes	covered pit latrine	public tab	no	4	No	Yes	Yes	Yes	No	No	Yes	No	No	No	Yes	No	Yes	No	No	No	No	No	No	No	Yes	No	no	0
32	female	47	6	9	10	unemployed	NGO	800	yes	yes	no	yes	no	no	no	yes	yes	yes	yes	no	Yes	covered pit latrine	public tab	no	4	No	Yes	Yes	Yes	Yes	No	Yes	No	No	No	No	No	No	No	Yes	No	No	No	No	No	Yes	No	no	3
26	male	41	5	8	4	unemployed	Government	1000	yes	yes	yes	no	no	no	no	no	no	no	no	no	No	ventilated pit latrine	piped in to dwelling	no	3	No	Yes	Yes	No	No	No	Yes	No	No	No	No	No	No	No	No	No	No	No	Yes	No	Yes	Yes	no	2
30	male	37	6	8	5	Government	Government	1200	yes	yes	yes	no	no	no	no	no	no	no	no	yes	Yes	covered pit latrine	piped in to dwelling	yes	3	Yes	Yes	Yes	Yes	Yes	No	Yes	No	No	No	No	No	No	Yes	No	No	No	No	No	No	Yes	No	no	3
24	female	35	10	10	4	day laborer	Day labourer	2000	no	no	no	no	no	no	no	no	no	no	no	no	No	covered pit latrine	public tab	yes	2	Yes	Yes	Yes	No	No	No	Yes	No	No	No	No	No	No	No	No	No	No	No	No	No	Yes	No	no	0
34	female	55	5	10	6	unemployed	Farmer	2000	yes	no	yes	no	no	no	no	no	no	no	no	yes	Yes	covered pit latrine	public tab	no	4	No	No	Yes	No	No	No	Yes	Yes	No	No	No	No	No	No	No	No	No	No	No	No	No	No	no	1
22	male	59	9	13	3	Government	Government	2000	yes	no	no	yes	no	no	no	no	no	no	no	yes	Yes	Open pit latrine	public tanker	no	4	No	Yes	Yes	No	Yes	No	Yes	No	No	No	Yes	No	No	No	No	No	Yes	No	No	No	Yes	No	no	2
27	male	54	8	12	4	unemployed	NGO	2000	yes	yes	yes	yes	yes	yes	no	no	yes	no	no	yes	Yes	covered pit latrine	piped in to dwelling	no	2	No	Yes	Yes	Yes	No	No	Yes	Yes	No	No	No	No	Yes	No	No	No	Yes	Yes	No	Yes	Yes	No	no	1
31	male	52	15	13	7	unemployed	Government	2000	yes	yes	yes	yes	yes	no	no	no	yes	no	no	yes	Yes	covered pit latrine	public tab	no	4	No	Yes	Yes	Yes	Yes	No	Yes	No	No	No	No	No	Yes	Yes	No	No	No	No	No	No	No	No	no	0
22	male	24	8	13	5	Student	Day labourer	3000	no	no	yes	no	no	no	no	no	no	no	no	no	No	covered pit latrine	public tab	no	4	Yes	Yes	Yes	No	No	No	Yes	No	No	No	Yes	No	No	No	No	No	No	No	No	Yes	Yes	No	no	2
27	male	48	6	7	5	unemployed	unemployed	100	no	no	yes	no	no	no	no	no	no	no	no	yes	Yes	covered pit latrine	public tab	no	3	No	Yes	Yes	Yes	Yes	No	Yes	Yes	Yes	No	Yes	No	No	No	No	No	No	No	No	No	Yes	No	no	4
30	male	39	4	0	8	unemployed	Farmer	800	no	no	yes	no	no	no	no	no	no	no	no	yes	Yes	Open pit latrine	public tab	yes	2	No	Yes	No	No	No	No	Yes	No	No	No	No	No	No	No	No	No	No	No	No	No	Yes	No	no	1
24	female	41	8	0	4	day laborer	NGO	800	no	no	no	no	no	no	no	no	no	no	no	yes	No	Open pit latrine	piped in to dwelling	no	3	No	Yes	Yes	Yes	No	No	No	Yes	No	Yes	Yes	No	No	Yes	No	No	No	No	No	Yes	Yes	No	no	2
30	female	24	5	6	5	unemployed	Government	900	yes	no	no	no	no	no	no	no	no	no	no	yes	Yes	Open pit latrine	piped in to dwelling	no	3	No	Yes	Yes	No	No	No	No	No	No	No	No	No	No	No	No	No	No	No	No	No	Yes	No	no	0
26	female	22	10	8	4	unemployed	NGO	2000	yes	yes	yes	yes	yes	yes	no	no	no	no	no	no	No	covered pit latrine	public tab	no	3	No	Yes	Yes	No	No	No	Yes	No	No	Yes	Yes	No	No	No	No	No	No	No	No	Yes	Yes	No	no	0
25	female	20	13	13	3	unemployed	Day labourer	3000	yes	yes	yes	yes	no	yes	no	yes	no	no	no	no	No	ventilated pit latrine	public tab	yes	4	No	Yes	Yes	Yes	No	No	Yes	No	No	No	No	No	No	No	Yes	No	No	No	No	No	No	No	no	0
25	male	39	13	15	4	unemployed	Government	4000	yes	no	yes	yes	yes	yes	no	no	yes	no	no	no	No	covered pit latrine	piped in to dwelling	no	3	No	Yes	No	No	No	No	Yes	Yes	Yes	Yes	Yes	Yes	No	Yes	No	No	No	No	No	Yes	No	No	no	0
27	female	46	3	6	4	unemployed	unemployed	0	no	no	yes	no	no	no	no	no	no	no	no	no	Yes	Open pit latrine	public tanker	yes	3	Yes	Yes	Yes	Yes	Yes	No	Yes	Yes	No	No	No	No	No	No	No	No	No	No	No	No	Yes	No	no	1
36	male	37	0	0	9	unemployed	unemployed	0	no	no	yes	no	no	no	no	no	no	no	no	no	Yes	Open pit latrine	public tab	no	3	No	Yes	No	Yes	No	No	No	No	No	Yes	No	No	No	No	No	No	No	No	No	No	Yes	No	no	0
42	female	59	0	0	7	unemployed	Farmer	500	yes	yes	yes	no	no	no	no	no	no	no	no	no	Yes	covered pit latrine	public tab	no	2	Yes	No	Yes	No	No	No	9	No	No	No	No	No	Yes	Yes	No	No	No	No	No	No	Yes	No	no	1
27	male	59	4	13	6	unemployed	Government	500	yes	no	no	no	no	no	no	no	no	no	no	yes	Yes	covered pit latrine	piped in to dwelling	yes	3	No	Yes	Yes	Yes	Yes	No	No	No	No	No	No	No	No	No	No	No	No	No	No	No	Yes	No	no	1
38	female	56	0	7	10	unemployed	Government	700	yes	no	yes	no	no	no	no	no	no	no	no	yes	Yes	Open pit latrine	public tab	no	3	No	Yes	Yes	Yes	No	No	Yes	Yes	No	No	No	No	No	Yes	No	No	No	No	No	No	Yes	No	no	0
25	male	32	3	9	5	Murchant	Farmer	1200	yes	yes	yes	no	no	no	no	no	no	no	no	yes	Yes	Open pit latrine	public tab	#NULL!	3	No	Yes	No	No	No	No	Yes	No	No	No	No	No	Yes	No	No	No	No	No	No	No	Yes	No	no	1
27	female	36	8	10	5	unemployed	NGO	1200	yes	yes	yes	yes	no	no	no	no	yes	no	no	yes	Yes	Open pit latrine	piped in to dwelling	no	3	No	No	Yes	Yes	Yes	No	Yes	No	No	No	No	No	No	Yes	No	No	No	No	No	No	Yes	No	no	2
25	male	22	6	3	4	day laborer	Day labourer	1500	no	no	no	no	no	no	no	no	no	no	no	no	Yes	covered pit latrine	public tab	yes	1	Yes	Yes	Yes	No	No	No	Yes	Yes	No	No	No	No	No	No	No	No	No	No	No	No	Yes	No	no	0
35	female	34	0	2	6	Murchant	Day labourer	1500	no	no	yes	no	no	no	no	no	no	no	yes	no	Yes	covered pit latrine	public tab	no	3	No	Yes	Yes	Yes	No	No	Yes	No	No	Yes	Yes	No	No	No	No	No	No	No	No	No	Yes	No	no	0
30	male	37	9	12	5	unemployed	Government	2000	yes	no	yes	yes	yes	yes	no	no	yes	no	no	yes	No	covered pit latrine	piped in to dwelling	no	3	Yes	Yes	Yes	Yes	Yes	Yes	Yes	Yes	Yes	Yes	Yes	No	No	Yes	No	No	Yes	No	No	No	Yes	No	no	1
25	female	26	4	8	4	day laborer	Day labourer	2100	yes	yes	no	no	no	no	no	no	no	no	no	no	No	ventilated pit latrine	public tab	yes	5	No	Yes	Yes	Yes	No	No	Yes	No	No	No	No	No	No	No	No	No	No	No	No	No	Yes	No	no	0
30	male	42	4	4	4	Murchant	Farmer	600	yes	yes	yes	yes	no	no	no	yes	no	no	no	no	Yes	covered pit latrine	public tab	no	4	No	Yes	Yes	Yes	No	Yes	Yes	No	No	No	No	No	No	No	No	No	No	No	No	No	Yes	No	no	1
25	male	26	10	13	4	unemployed	Government	800	yes	yes	yes	no	no	no	no	no	no	no	no	no	No	ventilated pit latrine	public tab	yes	3	No	Yes	Yes	No	No	No	Yes	No	No	Yes	Yes	No	Yes	No	No	No	No	No	No	No	No	No	no	1
24	male	53	4	7	5	unemployed	Farmer	1000	yes	yes	yes	yes	no	no	no	no	no	no	no	yes	Yes	Filed latrine	public tab	no	3	Yes	Yes	Yes	No	No	No	Yes	Yes	No	No	No	No	Yes	No	No	No	No	No	No	No	Yes	No	no	0
25	male	46	6	8	3	unemployed	NGO	1500	yes	yes	yes	no	no	no	no	no	no	no	no	yes	No	covered pit latrine	piped in to dwelling	no	3	No	Yes	Yes	Yes	No	No	Yes	No	No	Yes	No	No	No	No	No	No	No	No	No	No	No	No	no	4
28	male	20	0	3	6	unemployed	NGO	1500	yes	yes	yes	no	no	no	no	no	no	no	no	yes	No	Open pit latrine	piped in to dwelling	no	3	No	No	Yes	No	Yes	No	Yes	No	No	No	No	No	No	No	No	No	No	No	No	No	No	No	no	0
40	male	59	0	8	8	Other	Farmer	2000	yes	no	yes	no	no	no	no	no	no	no	no	yes	Yes	Open pit latrine	piped in to dwelling	no	4	No	Yes	Yes	Yes	Yes	No	Yes	No	No	No	No	No	No	No	No	No	No	No	No	No	Yes	No	no	1
22	male	31	6	4	3	NGO	Day labourer	3800	yes	no	yes	no	no	no	no	no	no	no	no	no	No	covered pit latrine	public tab	yes	4	No	Yes	No	No	No	No	Yes	No	No	No	No	No	No	No	No	No	No	No	No	No	No	No	no	0
30	female	59	0	0	6	unemployed	unemployed	0	no	no	no	no	no	no	no	no	no	no	no	yes	No	No latrine	public tab	no	3	No	Yes	Yes	Yes	No	No	No	No	No	No	No	No	No	No	No	No	No	No	No	No	Yes	No	no	1
27	female	48	3	#NULL!	8	unemployed	unemployed	0	yes	no	yes	no	no	no	no	no	yes	no	no	yes	Yes	Open pit latrine	public tab	no	3	No	No	Yes	Yes	Yes	No	Yes	Yes	No	No	No	No	No	No	No	No	No	No	No	No	Yes	No	no	2
35	male	45	0	0	5	unemployed	unemployed	0	no	no	no	no	no	no	no	no	no	no	no	yes	Yes	Open pit latrine	public tanker	yes	3	Yes	Yes	No	Yes	Yes	No	Yes	No	No	No	No	No	No	No	No	No	No	No	No	No	Yes	No	no	0
24	male	26	6	6	4	day laborer	Day labourer	300	yes	no	no	no	no	no	no	no	no	no	no	no	No	covered pit latrine	public tab	yes	4	No	Yes	Yes	Yes	No	No	Yes	Yes	No	No	No	No	No	No	No	No	Yes	No	No	No	Yes	No	no	3
36	female	51	0	8	5	unemployed	Murchant	300	yes	yes	yes	yes	no	no	no	no	no	no	no	no	No	covered pit latrine	public tab	no	4	No	Yes	Yes	No	No	No	Yes	No	No	Yes	Yes	No	No	Yes	No	No	Yes	No	No	Yes	Yes	No	no	0
26	female	24	4	3	3	day laborer	Day labourer	400	no	yes	yes	no	no	no	no	no	no	no	no	no	Yes	covered pit latrine	public tab	yes	3	Yes	Yes	Yes	Yes	Yes	No	Yes	Yes	Yes	Yes	Yes	No	No	Yes	Yes	No	Yes	No	No	Yes	Yes	No	no	4
22	female	20	7	9	2	day laborer	Day labourer	400	yes	no	yes	no	no	no	no	no	no	no	no	no	No	Open pit latrine	public tab	yes	3	No	Yes	Yes	Yes	No	No	Yes	No	No	No	No	No	No	No	No	No	No	No	No	No	Yes	No	no	1
32	male	48	3	3	8	unemployed	Day labourer	420	yes	no	yes	no	no	no	no	no	no	no	no	yes	No	Open pit latrine	public tab	no	3	No	Yes	No	Yes	No	Yes	Yes	Yes	No	No	No	No	No	No	No	No	No	No	No	No	Yes	No	no	9
40	male	54	0	0	8	Government	unemployed	500	no	no	no	no	no	no	no	no	no	no	no	no	Yes	covered pit latrine	public tab	no	3	Yes	Yes	Yes	No	Yes	No	Yes	No	No	Yes	No	No	No	No	No	No	No	No	No	Yes	Yes	No	no	1
30	male	29	0	0	6	unemployed	Farmer	500	yes	no	no	no	no	no	no	no	no	no	no	no	Yes	Open pit latrine	protected surface water	no	3	No	Yes	Yes	Yes	No	No	No	No	No	No	No	No	No	Yes	No	No	No	No	No	No	Yes	No	no	2
24	female	40	4	4	4	unemployed	Day labourer	500	no	no	no	no	no	no	no	no	no	no	no	yes	Yes	No latrine	public tab	yes	3	Yes	Yes	Yes	Yes	No	No	Yes	No	No	No	No	No	No	Yes	No	No	No	No	No	No	No	No	no	7
28	male	48	0	3	7	Government	Day labourer	600	no	no	no	no	no	no	no	no	no	no	no	no	No	Open pit latrine	public tab	no	3	Yes	Yes	Yes	Yes	No	No	Yes	Yes	Yes	No	No	No	No	No	No	No	No	No	No	No	Yes	No	no	2
45	female	40	0	0	6	Government	other	690	yes	no	yes	no	no	no	no	no	no	no	no	no	Yes	covered pit latrine	public tab	no	3	No	Yes	Yes	No	No	No	Yes	No	No	Yes	No	No	Yes	Yes	No	No	No	No	No	No	Yes	No	no	2
19	female	42	6	8	5	unemployed	Day labourer	1200	yes	no	yes	no	no	no	no	no	no	no	no	yes	No	Open pit latrine	public tanker	no	3	No	Yes	No	No	No	No	No	No	No	No	No	No	No	No	No	No	No	No	No	No	Yes	No	no	1
21	male	25	8	13	4	unemployed	Government	1500	no	no	yes	no	no	no	no	no	no	no	no	yes	Yes	Open pit latrine	public tab	no	2	Yes	Yes	Yes	Yes	No	No	Yes	Yes	No	No	Yes	No	Yes	Yes	No	No	No	No	No	Yes	Yes	No	no	4
32	female	32	7	9	7	Government	Government	2000	yes	no	yes	yes	no	no	no	no	yes	no	no	no	Yes	covered pit latrine	public tab	no	4	No	Yes	Yes	No	No	No	Yes	No	No	Yes	No	No	No	No	No	No	No	No	No	No	No	No	no	2
23	female	37	10	8	4	unemployed	NGO	2000	yes	yes	yes	yes	no	no	no	no	no	no	no	yes	Yes	covered pit latrine	piped in to dwelling	yes	4	No	Yes	Yes	Yes	Yes	No	Yes	Yes	No	No	Yes	No	No	No	Yes	No	No	No	No	No	Yes	No	no	2
27	male	59	13	13	5	Government	NGO	2700	yes	no	no	yes	no	no	no	no	yes	no	no	yes	No	covered pit latrine	piped in to dwelling	no	4	No	Yes	Yes	Yes	Yes	Yes	Yes	Yes	Yes	Yes	Yes	No	No	Yes	No	No	No	No	No	Yes	No	No	no	0
27	male	34	9	12	4	Government	Government	3000	yes	yes	yes	yes	yes	yes	no	no	yes	no	no	yes	Yes	covered pit latrine	piped in to dwelling	no	4	No	Yes	Yes	Yes	No	No	No	No	No	No	Yes	No	No	Yes	No	No	No	No	No	No	Yes	No	no	0
25	male	36	6	7	5	unemployed	Day labourer	0	yes	yes	yes	yes	no	no	no	no	no	no	no	no	No	covered pit latrine	public tab	no	3	No	Yes	Yes	No	Yes	Yes	Yes	No	No	No	No	No	No	No	No	No	Yes	No	No	Yes	Yes	No	no	2
30	female	22	8	#NULL!	3	unemployed	Day labourer	300	yes	no	no	no	no	no	no	no	no	no	no	no	No	ventilated pit latrine	public tab	yes	3	No	Yes	Yes	Yes	No	No	Yes	No	No	No	No	No	No	No	No	No	No	No	No	No	Yes	No	no	0
24	female	36	3	5	4	unemployed	Day labourer	400	yes	no	yes	no	no	no	no	no	no	no	no	no	No	Open pit latrine	public tab	yes	3	No	Yes	Yes	Yes	Yes	No	Yes	No	No	No	No	No	No	No	No	No	No	No	No	No	Yes	No	no	1
30	female	33	4	4	6	unemployed	Farmer	500	yes	yes	yes	yes	no	no	no	no	no	no	no	no	Yes	Open pit latrine	public tab	yes	2	No	Yes	Yes	Yes	No	No	Yes	No	No	No	Yes	No	No	No	No	No	No	No	No	Yes	Yes	No	no	0
23	male	44	7	10	4	unemployed	Day labourer	500	yes	yes	no	no	no	no	no	no	no	no	no	yes	Yes	Open pit latrine	piped in to dwelling	no	3	No	Yes	Yes	Yes	No	No	Yes	No	No	No	No	No	No	No	No	No	No	No	No	No	Yes	No	9	0
25	male	24	12	12	4	NGO	Day labourer	800	yes	yes	yes	no	no	no	no	no	no	no	no	no	Yes	Open pit latrine	piped in to dwelling	yes	3	No	Yes	Yes	Yes	No	No	Yes	No	No	No	No	No	No	No	No	No	No	No	Yes	No	No	No	no	0
25	female	52	6	11	4	unemployed	Government	857	yes	no	no	no	no	no	no	no	no	no	no	no	Yes	Filed latrine	public tanker	no	3	No	Yes	Yes	No	Yes	Yes	Yes	No	No	No	No	No	No	Yes	No	No	No	No	No	No	Yes	No	no	1
21	male	36	10	12	4	Murchant	Day labourer	900	yes	no	yes	no	no	yes	no	no	no	no	no	no	No	Open pit latrine	public tab	no	3	Yes	Yes	Yes	Yes	Yes	Yes	Yes	No	No	Yes	Yes	No	No	No	No	No	No	No	No	No	No	No	no	0
28	female	25	10	12	4	Government	NGO	1000	yes	yes	yes	no	no	no	no	no	no	no	no	no	No	covered pit latrine	public tab	no	4	No	Yes	Yes	No	No	No	Yes	No	No	Yes	No	No	No	No	No	No	No	No	No	No	No	No	no	1
19	male	28	6	13	3	unemployed	Murchant	1000	yes	yes	no	yes	no	no	no	no	no	no	no	no	No	covered pit latrine	public tanker	yes	3	Yes	Yes	No	No	No	No	Yes	No	No	Yes	No	No	No	No	No	No	No	No	No	No	Yes	No	no	0
28	male	47	0	5	4	unemployed	Day labourer	1200	yes	no	no	yes	no	no	no	no	no	no	no	no	No	Open pit latrine	public tanker	no	2	No	Yes	Yes	Yes	No	No	No	No	No	Yes	Yes	No	No	No	No	No	No	No	No	No	Yes	No	no	0
29	female	25	0	5	5	unemployed	Day labourer	1800	yes	yes	yes	no	no	no	no	no	no	no	no	no	No	Open pit latrine	piped in to dwelling	yes	3	Yes	Yes	No	Yes	No	No	Yes	No	No	No	No	No	No	No	No	No	No	No	No	No	Yes	No	no	0
23	female	21	10	13	5	unemployed	Government	2000	yes	no	yes	yes	no	no	no	no	no	no	no	no	No	Open pit latrine	piped in to dwelling	yes	3	No	Yes	No	Yes	No	No	Yes	Yes	No	No	No	No	No	No	No	No	No	No	No	No	No	No	no	1
49	female	46	0	0	11	unemployed	Day labourer	2000	yes	yes	yes	no	no	no	no	no	yes	no	no	no	No	ventilated pit latrine	public tab	no	3	Yes	Yes	Yes	No	No	No	Yes	No	No	No	Yes	No	Yes	Yes	No	No	No	No	No	No	Yes	No	no	2
25	female	47	10	10	5	unemployed	Murchant	3000	yes	yes	yes	yes	no	yes	no	no	yes	no	no	no	No	covered pit latrine	piped in to dwelling	no	3	No	Yes	Yes	No	Yes	No	Yes	No	No	No	Yes	No	No	No	No	No	Yes	No	No	Yes	Yes	No	no	0
26	male	36	15	15	4	Government	Government	4000	yes	yes	yes	yes	yes	yes	yes	no	yes	no	no	no	Yes	covered pit latrine	piped in to dwelling	no	3	Yes	Yes	Yes	Yes	Yes	No	Yes	No	Yes	Yes	Yes	No	No	No	No	No	No	No	No	No	Yes	No	no	2
34	female	20	14	17	5	Government	Government	8000	yes	yes	yes	yes	yes	yes	yes	no	no	no	no	yes	Yes	covered pit latrine	piped in to dwelling	no	5	No	Yes	Yes	Yes	Yes	No	Yes	No	Yes	No	Yes	No	Yes	Yes	No	No	No	No	No	No	Yes	No	no	1
42	female	41	14	17	4	Government	Government	8000	yes	yes	yes	yes	no	no	yes	no	no	no	no	no	Yes	ventilated pit latrine	piped in to dwelling	no	5	No	Yes	Yes	No	Yes	No	Yes	No	Yes	No	Yes	No	Yes	Yes	Yes	No	Yes	No	No	Yes	Yes	No	no	0
26	male	47	1	5	6	unemployed	Murchant	300	yes	no	yes	no	no	no	no	no	no	no	no	yes	No	Open pit latrine	public tab	no	3	No	Yes	Yes	No	No	No	Yes	Yes	Yes	No	Yes	No	No	No	No	No	No	No	No	No	Yes	No	no	0
21	male	39	2	7	3	day laborer	Day labourer	350	no	no	no	no	no	no	no	no	no	no	no	no	No	Open pit latrine	public tab	yes	3	No	Yes	Yes	Yes	No	No	Yes	No	No	No	No	No	No	No	No	No	No	No	No	No	No	No	no	0
25	female	46	3	7	4	unemployed	NGO	500	yes	yes	yes	no	no	no	no	no	no	no	no	yes	No	No latrine	public tanker	no	2	No	No	Yes	Yes	No	No	No	No	No	No	No	No	No	No	No	No	No	No	No	No	No	No	no	2
29	female	41	0	3	4	unemployed	Day labourer	600	no	no	yes	no	no	no	no	no	no	no	no	yes	Yes	covered pit latrine	public tab	no	4	No	Yes	Yes	No	Yes	No	Yes	No	No	No	No	No	No	No	No	No	No	No	No	No	Yes	No	no	2
22	male	45	7	8	4	unemployed	Day labourer	900	yes	no	yes	no	no	no	no	no	no	no	no	no	No	ventilated pit latrine	public tab	no	3	Yes	Yes	Yes	No	No	No	Yes	No	No	No	No	No	No	No	No	No	No	No	No	Yes	Yes	No	no	1
26	male	48	6	10	4	unemployed	Government	900	yes	yes	yes	no	no	no	no	no	yes	no	no	yes	Yes	covered pit latrine	public tab	no	4	No	Yes	Yes	Yes	No	No	Yes	No	No	No	No	No	Yes	Yes	No	No	No	No	No	No	Yes	No	no	2
25	female	36	4	4	3	unemployed	NGO	960	no	no	no	no	no	no	no	no	no	no	no	yes	No	Open pit latrine	piped in to dwelling	no	3	Yes	Yes	No	No	No	No	No	No	No	No	No	No	No	No	No	No	No	No	No	No	Yes	No	no	0
25	female	45	10	8	4	Other	Murchant	1000	yes	yes	yes	no	no	no	no	no	no	no	no	yes	Yes	covered pit latrine	piped in to dwelling	no	3	No	No	No	Yes	No	No	Yes	Yes	No	No	Yes	No	Yes	No	No	No	No	No	No	No	Yes	No	no	1
25	female	32	10	13	3	unemployed	NGO	1500	yes	yes	yes	yes	no	no	no	no	no	no	no	no	No	covered pit latrine	public tab	yes	3	No	Yes	Yes	No	No	Yes	Yes	No	No	No	No	No	No	No	No	No	No	No	No	No	Yes	No	no	0
27	male	59	8	7	8	NGO	Farmer	2000	yes	yes	yes	yes	no	no	no	no	no	no	no	yes	Yes	covered pit latrine	public tanker	no	3	No	Yes	Yes	No	No	No	Yes	No	No	Yes	Yes	No	No	No	No	No	Yes	No	No	Yes	Yes	No	no	1
22	female	28	6	10	7	Government	Day labourer	2300	yes	yes	yes	yes	no	no	no	no	no	no	no	yes	Yes	Open pit latrine	piped in to dwelling	yes	3	Yes	No	Yes	Yes	No	No	Yes	No	No	Yes	No	No	No	No	No	No	No	No	No	No	Yes	No	no	2
32	male	40	0	2	8	unemployed	Day labourer	100	yes	yes	yes	no	no	no	no	no	no	no	no	no	Yes	covered pit latrine	public tab	no	4	No	Yes	Yes	Yes	No	No	No	No	No	No	No	No	No	No	No	No	No	No	No	No	Yes	No	no	3
30	female	48	0	2	6	NGO	Day labourer	600	yes	yes	yes	no	no	no	no	no	no	no	no	yes	Yes	Open pit latrine	public tab	no	4	Yes	Yes	No	Yes	Yes	No	Yes	Yes	No	No	No	No	No	No	No	No	No	No	No	No	Yes	No	no	2
26	male	34	4	4	4	unemployed	Day labourer	600	yes	no	no	no	no	no	no	no	no	no	no	no	No	Open pit latrine	public tab	no	4	No	Yes	Yes	No	Yes	No	Yes	Yes	No	No	Yes	No	No	No	No	No	No	No	No	No	Yes	No	no	0
24	female	37	6	13	5	unemployed	NGO	800	yes	no	no	no	no	no	no	no	no	no	no	yes	Yes	Open pit latrine	public tanker	no	3	No	Yes	Yes	Yes	No	No	Yes	No	No	No	No	No	No	No	No	No	No	No	No	No	Yes	No	no	2
30	male	47	3	8	7	unemployed	Government	900	yes	yes	yes	yes	no	no	no	yes	no	no	no	yes	No	ventilated pit latrine	public tab	no	4	No	No	Yes	Yes	No	No	Yes	Yes	No	Yes	No	No	No	No	No	No	No	No	No	No	No	No	no	0
26	male	36	8	10	4	day laborer	Day labourer	1000	yes	no	no	no	no	no	no	no	no	no	no	no	No	covered pit latrine	piped in to dwelling	no	2	Yes	No	Yes	No	Yes	No	Yes	No	No	No	No	No	No	No	No	No	Yes	No	No	No	Yes	No	no	1
29	male	49	8	10	6	unemployed	Day labourer	1000	yes	yes	yes	no	no	no	no	no	no	no	no	yes	No	covered pit latrine	piped in to dwelling	no	4	No	No	Yes	No	No	No	Yes	No	No	No	No	No	No	No	No	No	Yes	No	No	Yes	Yes	No	no	0
30	male	36	3	9	4	unemployed	Day labourer	1200	yes	yes	yes	no	no	no	no	no	no	no	no	yes	Yes	covered pit latrine	public tab	no	4	No	Yes	No	Yes	No	No	Yes	Yes	No	No	No	No	No	No	No	No	No	No	No	No	Yes	No	no	0
25	male	43	7	8	4	unemployed	NGO	1300	no	no	no	no	no	no	no	no	no	no	no	yes	No	Open pit latrine	piped in to dwelling	no	3	No	Yes	Yes	No	No	No	Yes	Yes	No	No	No	No	No	No	No	No	No	No	No	No	No	No	no	1
24	female	33	7	8	3	unemployed	NGO	2000	yes	yes	no	yes	yes	no	no	no	yes	no	no	yes	Yes	covered pit latrine	piped in to dwelling	no	4	No	Yes	Yes	Yes	Yes	No	Yes	No	Yes	Yes	No	No	No	No	No	No	No	No	No	Yes	Yes	No	no	0
37	male	29	0	0	5	day laborer	Day labourer	3000	no	no	no	no	no	no	no	no	no	no	no	no	No	ventilated pit latrine	public tab	yes	3	No	Yes	No	Yes	No	No	Yes	Yes	No	Yes	Yes	No	No	No	No	No	No	No	No	No	Yes	No	no	3
30	male	29	13	13	6	Government	other	4400	yes	yes	yes	yes	yes	no	no	no	yes	no	no	no	No	covered pit latrine	piped in to dwelling	no	2	Yes	Yes	No	No	Yes	No	Yes	No	No	Yes	Yes	No	Yes	No	No	No	No	No	No	No	Yes	No	no	1
25	male	40	13	8	5	Government	Murchant	9000	yes	yes	yes	yes	no	no	no	no	no	no	no	no	No	ventilated pit latrine	public tab	yes	5	No	Yes	Yes	Yes	Yes	No	Yes	No	No	Yes	Yes	No	No	No	Yes	No	No	No	No	No	Yes	No	no	0
25	female	24	4	6	6	unemployed	unemployed	0	no	no	yes	no	no	no	no	no	no	no	no	yes	Yes	covered pit latrine	piped in to dwelling	no	3	No	Yes	No	No	No	No	Yes	No	No	No	No	No	Yes	No	No	No	No	No	No	Yes	No	No	no	3
22	female	29	2	5	4	Other	other	200	no	no	no	no	no	no	no	no	no	no	no	no	No	No latrine	public tab	yes	2	Yes	Yes	Yes	Yes	No	No	Yes	Yes	No	Yes	Yes	No	No	No	No	No	Yes	No	No	No	No	No	no	1
25	male	30	3	3	5	unemployed	NGO	600	yes	no	yes	yes	no	no	no	no	yes	no	no	no	No	Open pit latrine	piped in to dwelling	yes	2	No	Yes	Yes	No	No	No	Yes	Yes	No	No	Yes	Yes	No	No	No	No	No	No	No	No	No	No	no	0
27	female	48	4	6	5	unemployed	Day labourer	600	yes	no	yes	no	no	no	no	no	no	no	no	yes	No	covered pit latrine	piped in to dwelling	no	3	No	Yes	No	No	Yes	No	No	No	No	No	No	No	No	No	No	No	No	No	No	Yes	Yes	No	no	0
30	female	30	5	8	8	unemployed	NGO	700	yes	no	yes	no	no	no	no	no	no	no	no	yes	Yes	covered pit latrine	piped in to dwelling	no	3	No	Yes	Yes	No	No	No	Yes	No	No	No	No	No	Yes	Yes	No	No	No	No	No	No	Yes	No	no	3
28	female	59	5	8	4	unemployed	Day labourer	800	yes	yes	yes	no	no	no	no	no	no	no	no	no	No	covered pit latrine	public tab	no	3	No	No	Yes	No	No	No	Yes	Yes	No	No	No	No	No	No	No	No	No	No	No	No	Yes	Yes	no	1
32	female	29	10	6	8	unemployed	Day labourer	1000	yes	no	no	no	no	no	no	no	no	no	no	yes	Yes	covered pit latrine	public tab	no	4	No	Yes	Yes	Yes	No	No	Yes	No	No	No	No	No	Yes	Yes	No	No	No	No	No	No	Yes	No	no	0
27	male	32	10	12	5	unemployed	Government	1600	yes	yes	yes	yes	no	yes	no	no	no	no	no	yes	No	ventilated pit latrine	piped in to dwelling	no	1	No	Yes	Yes	Yes	Yes	No	Yes	No	No	Yes	No	No	No	Yes	No	No	No	No	No	No	Yes	No	no	1
25	female	24	9	9	6	unemployed	unemployed	0	no	no	no	no	no	no	no	no	no	no	no	yes	No	Open pit latrine	public tab	no	2	Yes	No	No	No	No	No	Yes	No	No	No	No	No	No	No	No	No	No	No	No	No	Yes	No	no	0
38	male	35	7	4	3	unemployed	NGO	700	yes	no	yes	no	no	no	no	no	no	no	no	no	No	covered pit latrine	piped in to dwelling	no	3	Yes	Yes	Yes	Yes	Yes	Yes	Yes	No	No	No	No	No	No	No	No	No	No	No	No	No	Yes	No	no	0
26	male	33	10	12	3	unemployed	NGO	1200	yes	yes	yes	yes	no	no	no	no	no	no	no	no	No	Open pit latrine	piped in to dwelling	no	4	No	Yes	Yes	Yes	No	No	Yes	No	No	No	No	No	No	No	No	No	No	No	No	Yes	Yes	No	no	0
27	male	24	8	0	3	unemployed	Day labourer	1500	no	no	no	no	no	no	no	no	no	no	no	yes	Yes	Open pit latrine	public tab	yes	3	Yes	Yes	Yes	Yes	No	Yes	No	No	No	No	No	No	No	No	No	No	No	No	No	No	No	No	no	0
24	female	51	5	8	3	unemployed	other	1500	yes	no	yes	yes	yes	yes	yes	yes	yes	yes	no	no	No	covered pit latrine	public tab	no	4	Yes	Yes	Yes	No	No	No	Yes	Yes	No	No	No	No	No	No	No	No	No	No	No	No	Yes	No	no	1
24	female	29	10	10	5	unemployed	NGO	1500	yes	yes	yes	yes	no	no	no	no	yes	no	no	no	No	ventilated pit latrine	public tab	no	4	Yes	Yes	Yes	Yes	Yes	Yes	Yes	9	Yes	No	Yes	No	No	No	Yes	No	No	No	No	Yes	Yes	No	no	0
24	female	20	10	8	5	unemployed	NGO	2000	yes	yes	no	yes	no	no	no	no	no	no	no	yes	No	Open pit latrine	public tab	no	3	No	Yes	Yes	Yes	Yes	No	Yes	No	Yes	No	Yes	No	No	Yes	No	No	No	No	No	Yes	Yes	No	no	3
27	male	59	12	12	7	unemployed	Murchant	4000	yes	yes	no	yes	yes	no	no	no	no	yes	no	yes	Yes	covered pit latrine	piped in to dwelling	no	4	No	Yes	Yes	Yes	Yes	No	Yes	No	No	Yes	Yes	No	Yes	Yes	No	No	Yes	No	No	Yes	No	No	no	3
33	male	40	0	0	3	unemployed	unemployed	0	no	yes	no	no	no	no	no	no	no	no	no	yes	Yes	Open pit latrine	public tanker	yes	2	Yes	Yes	No	Yes	No	No	No	Yes	No	No	No	No	No	No	No	No	No	No	No	No	Yes	No	no	0
26	male	42	7	10	6	day laborer	#NULL!	400	no	no	yes	no	no	no	no	no	no	no	no	no	No	Open pit latrine	public tab	no	3	No	Yes	No	Yes	No	No	Yes	No	No	No	No	No	No	No	No	No	No	No	No	No	Yes	No	no	2
24	male	30	5	4	4	unemployed	Day labourer	500	yes	yes	yes	yes	no	no	no	no	no	no	no	no	No	Open pit latrine	public tab	yes	3	No	Yes	Yes	Yes	No	No	Yes	No	No	Yes	Yes	No	No	No	No	No	No	No	No	No	No	No	no	1
21	male	37	9	9	3	unemployed	Government	600	yes	yes	yes	no	no	no	no	no	no	no	no	yes	No	Open pit latrine	public tab	no	3	Yes	Yes	No	Yes	No	No	Yes	No	No	No	No	No	No	No	No	No	No	No	No	No	No	No	no	1
20	male	34	6	8	3	unemployed	Government	600	yes	no	no	no	no	no	no	no	no	no	no	yes	No	Open pit latrine	public tab	yes	3	No	Yes	Yes	No	No	No	Yes	No	No	No	No	No	No	No	No	No	No	No	No	No	Yes	No	no	1
20	male	28	5	7	5	unemployed	Day labourer	1000	yes	no	yes	no	no	no	no	no	no	no	no	yes	Yes	ventilated pit latrine	public tab	yes	2	No	No	Yes	No	Yes	No	Yes	No	No	No	Yes	No	No	No	No	No	No	No	No	Yes	Yes	No	no	1
20	male	37	6	6	3	NGO	NGO	1500	yes	yes	no	no	no	no	no	no	no	no	no	yes	No	Open pit latrine	piped in to dwelling	no	3	No	Yes	No	Yes	No	No	Yes	No	No	No	No	No	No	No	No	No	No	No	No	No	Yes	No	no	1
26	male	37	9	10	4	unemployed	unemployed	1500	yes	yes	no	yes	no	no	no	no	no	no	no	no	Yes	covered pit latrine	piped in to dwelling	no	3	No	Yes	Yes	Yes	Yes	No	No	No	No	No	Yes	No	No	No	No	No	Yes	No	Yes	No	Yes	No	no	1
22	female	53	9	13	3	Student	Government	1700	yes	yes	yes	no	no	no	no	no	no	no	no	no	Yes	ventilated pit latrine	public tab	no	3	No	Yes	Yes	Yes	No	Yes	Yes	Yes	No	Yes	Yes	No	Yes	No	No	No	Yes	No	No	Yes	Yes	No	no	2
23	female	29	12	12	3	unemployed	NGO	5000	yes	yes	yes	yes	no	yes	no	yes	no	no	no	no	No	ventilated pit latrine	public tab	yes	3	Yes	Yes	Yes	Yes	No	No	Yes	No	Yes	Yes	Yes	No	No	No	No	No	No	No	No	No	Yes	No	no	2
20	male	50	8	0	3	unemployed	Murchant	7500	yes	no	yes	no	no	no	no	no	no	no	no	no	No	covered pit latrine	public tanker	no	4	No	Yes	Yes	No	No	No	Yes	No	Yes	No	No	No	No	No	No	No	No	No	No	No	No	No	no	0
31	male	52	0	4	5	unemployed	Day labourer	500	no	no	no	no	no	no	no	no	no	no	no	no	No	Open pit latrine	public tab	no	3	No	Yes	Yes	Yes	Yes	No	Yes	No	No	No	No	No	No	Yes	No	No	No	No	No	No	Yes	No	no	0
20	male	24	8	12	4	unemployed	Day labourer	600	yes	no	yes	no	no	no	no	no	no	no	no	yes	No	Open pit latrine	public tab	yes	2	No	Yes	No	Yes	No	No	Yes	Yes	No	No	No	No	No	No	No	No	No	No	No	No	No	No	no	7
24	female	33	0	6	3	unemployed	Day labourer	700	no	no	no	no	no	no	no	no	no	no	no	no	No	Open pit latrine	public tab	yes	3	No	No	Yes	Yes	No	No	No	No	No	No	No	No	No	No	No	No	No	No	No	No	Yes	No	no	0
24	female	20	8	9	3	unemployed	Day labourer	700	yes	yes	yes	no	no	no	no	no	no	no	no	yes	Yes	Open pit latrine	public tab	yes	3	No	Yes	No	Yes	No	No	Yes	No	No	No	No	No	No	No	Yes	No	No	No	No	No	No	No	no	0
28	male	32	6	7	5	unemployed	Day labourer	700	yes	yes	yes	no	no	no	no	no	no	no	no	no	Yes	Open pit latrine	public tab	no	4	Yes	Yes	Yes	Yes	Yes	No	Yes	Yes	No	No	No	No	No	No	No	No	No	No	No	No	Yes	No	no	3
23	female	25	8	4	4	unemployed	Murchant	1000	yes	yes	no	no	no	no	no	no	no	no	no	yes	Yes	covered pit latrine	piped in to dwelling	yes	4	No	Yes	Yes	Yes	Yes	No	No	Yes	No	No	Yes	No	Yes	Yes	Yes	No	No	No	No	No	Yes	No	no	1
24	female	40	3	7	5	unemployed	Government	1000	yes	no	no	no	no	no	no	no	no	no	no	yes	No	Open pit latrine	public tanker	no	3	No	Yes	Yes	No	No	No	Yes	No	No	No	No	No	No	Yes	No	No	No	No	No	No	Yes	No	no	1
19	female	48	3	6	3	unemployed	Day labourer	1800	yes	yes	yes	no	no	no	no	no	no	no	no	no	No	covered pit latrine	public tanker	no	2	No	No	Yes	Yes	No	No	Yes	Yes	No	No	Yes	No	No	No	No	No	No	No	No	No	Yes	No	no	1
20	male	24	8	12	4	unemployed	Murchant	2000	yes	no	no	no	no	no	no	no	no	no	no	no	No	Open pit latrine	piped in to dwelling	no	4	No	Yes	Yes	Yes	No	No	No	No	No	No	No	No	No	No	No	No	No	No	No	No	Yes	No	no	1
25	male	33	5	6	4	day laborer	Day labourer	3000	yes	no	no	no	no	no	no	no	no	no	no	no	No	covered pit latrine	public tab	yes	2	No	Yes	Yes	No	No	No	Yes	Yes	No	No	No	No	No	No	No	No	No	No	No	No	Yes	No	no	1
36	female	35	0	0	7	unemployed	Government	600	no	no	yes	no	no	no	no	no	no	no	no	yes	Yes	Open pit latrine	public tab	yes	3	No	Yes	Yes	Yes	No	No	Yes	No	No	Yes	Yes	No	Yes	No	No	No	No	No	No	No	Yes	No	no	2
25	male	35	12	16	4	Government	NGO	1200	yes	yes	yes	yes	no	no	no	no	no	no	no	no	No	ventilated pit latrine	piped in to dwelling	no	3	Yes	Yes	Yes	No	Yes	No	Yes	No	Yes	No	Yes	No	No	No	No	No	No	No	No	Yes	Yes	No	no	0
29	female	38	9	8	6	unemployed	NGO	2000	yes	yes	yes	yes	no	no	no	no	no	no	no	no	No	Open pit latrine	public tanker	no	3	No	Yes	Yes	No	Yes	No	Yes	No	No	No	Yes	No	No	No	No	No	No	No	No	Yes	No	No	no	1
22	male	41	6	8	3	unemployed	Day labourer	3000	yes	no	yes	no	no	no	no	no	no	no	no	no	No	ventilated pit latrine	public tab	no	3	No	Yes	Yes	No	No	No	Yes	No	No	Yes	No	No	No	No	No	No	No	No	No	No	No	No	no	1
22	male	24	8	12	4	unemployed	other	3000	yes	yes	yes	no	no	no	no	no	no	no	no	yes	No	Open pit latrine	public tab	yes	2	No	Yes	No	Yes	No	No	Yes	Yes	No	No	Yes	No	Yes	No	No	No	No	No	No	No	Yes	No	no	1
20	male	40	8	13	4	Government	Government	4500	yes	yes	yes	yes	no	yes	no	no	yes	no	no	no	No	ventilated pit latrine	public tab	yes	4	No	Yes	No	No	No	No	No	Yes	No	No	Yes	Yes	No	No	Yes	No	No	No	No	No	No	No	no	2
25	male	55	0	8	5	unemployed	unemployed	0	yes	no	yes	no	no	no	no	no	no	no	no	no	No	Open pit latrine	piped in to dwelling	no	3	No	Yes	Yes	No	No	No	Yes	No	No	No	No	No	No	No	No	No	No	No	No	No	Yes	No	no	2
23	male	35	8	10	4	unemployed	Murchant	200	yes	no	no	yes	yes	no	no	no	yes	no	no	yes	Yes	covered pit latrine	piped in to dwelling	no	3	No	Yes	Yes	No	Yes	No	Yes	No	Yes	Yes	Yes	Yes	No	Yes	No	No	No	No	No	Yes	Yes	No	no	0
32	male	52	1	5	8	unemployed	Day labourer	300	yes	yes	yes	no	no	no	no	no	no	no	yes	no	Yes	covered pit latrine	public tab	no	3	No	Yes	Yes	No	No	No	Yes	No	No	No	No	No	No	No	No	No	No	No	No	No	Yes	No	no	1
29	female	26	1	0	4	day laborer	#NULL!	800	no	no	no	no	no	no	no	no	no	no	no	no	No	Open pit latrine	public tab	yes	4	No	Yes	No	Yes	No	No	Yes	No	No	Yes	No	No	No	No	No	No	No	No	No	Yes	Yes	No	no	3
30	female	45	3	8	5	unemployed	NGO	800	yes	yes	yes	no	no	no	no	no	no	no	no	yes	No	covered pit latrine	piped in to dwelling	no	2	Yes	No	Yes	Yes	Yes	No	No	No	No	No	No	No	No	No	No	No	No	No	No	No	No	No	no	0
28	male	32	4	6	6	unemployed	Government	800	yes	no	yes	yes	no	no	no	no	no	no	no	yes	Yes	Open pit latrine	public tab	yes	3	No	Yes	No	No	No	No	No	No	No	Yes	No	No	No	No	No	No	No	No	No	Yes	Yes	No	no	0
28	female	48	1	4	7	unemployed	Government	800	no	yes	yes	no	no	no	no	no	no	no	no	yes	Yes	Open pit latrine	public tab	no	3	No	Yes	Yes	No	Yes	No	Yes	No	No	No	No	No	Yes	No	Yes	No	No	No	No	No	Yes	No	no	1
40	female	58	0	0	7	unemployed	Government	1000	yes	no	no	no	no	no	no	no	no	no	no	yes	Yes	Open pit latrine	public tanker	no	3	No	Yes	Yes	No	No	No	Yes	Yes	No	No	No	No	No	No	No	No	Yes	No	No	No	Yes	No	no	4
21	male	49	8	13	4	unemployed	Government	1500	no	no	yes	no	no	no	no	no	no	no	no	yes	Yes	Open pit latrine	public tab	no	3	Yes	Yes	Yes	Yes	No	No	Yes	Yes	No	Yes	Yes	No	Yes	Yes	No	No	No	No	No	Yes	Yes	No	no	4
28	female	36	8	9	5	unemployed	Day labourer	2000	yes	yes	yes	yes	no	no	no	no	no	no	no	yes	No	covered pit latrine	public tab	no	4	No	Yes	Yes	Yes	No	Yes	Yes	No	No	No	No	No	No	No	No	No	No	No	No	Yes	Yes	No	no	0
21	male	37	7	8	4	unemployed	Murchant	3000	yes	no	no	no	no	no	no	no	no	no	no	no	Yes	Open pit latrine	public tanker	no	3	No	No	Yes	Yes	No	No	Yes	Yes	No	No	No	No	No	No	Yes	No	No	No	No	Yes	Yes	No	no	1
28	female	39	13	13	5	Government	Government	4500	yes	yes	yes	yes	yes	yes	no	no	no	no	no	no	No	covered pit latrine	piped in to dwelling	no	3	Yes	No	Yes	No	No	No	Yes	No	Yes	No	Yes	No	No	Yes	Yes	No	Yes	No	No	No	Yes	No	no	0
28	male	36	4	6	3	unemployed	Day labourer	500	yes	no	no	no	no	no	no	no	no	no	no	no	No	Open pit latrine	public tab	no	3	Yes	Yes	Yes	No	No	No	Yes	No	No	No	No	No	No	No	No	No	No	No	No	No	Yes	No	no	2
30	male	49	0	5	7	unemployed	Government	600	yes	no	no	no	no	no	no	no	no	no	no	no	Yes	Open pit latrine	public tanker	no	2	Yes	Yes	Yes	Yes	Yes	No	Yes	Yes	No	No	No	No	No	No	No	No	No	No	No	No	No	No	no	2
26	male	20	6	8	4	day laborer	unemployed	600	yes	no	yes	no	no	no	no	no	no	no	no	no	Yes	Open pit latrine	public tanker	yes	3	No	Yes	Yes	No	Yes	No	Yes	No	No	No	Yes	No	Yes	No	No	No	No	No	No	No	Yes	No	no	4
23	female	20	5	8	3	day laborer	unemployed	1500	yes	no	no	no	no	no	no	no	no	no	no	no	No	ventilated pit latrine	public tab	yes	3	No	Yes	Yes	No	No	No	Yes	No	No	No	No	No	No	No	No	No	No	No	No	No	No	No	no	2
22	female	36	11	8	3	NGO	NGO	2000	yes	no	yes	no	yes	no	no	no	no	no	no	no	No	covered pit latrine	public tab	yes	4	No	Yes	Yes	No	Yes	No	Yes	No	No	No	No	No	No	No	No	No	No	No	No	No	Yes	No	no	1
25	male	39	4	7	3	unemployed	unemployed	0	no	no	no	no	no	no	no	no	no	no	no	yes	Yes	No latrine	public tanker	yes	3	No	Yes	No	No	No	No	Yes	Yes	No	No	No	No	No	No	No	No	No	No	No	No	Yes	No	no	0
26	male	55	7	12	4	unemployed	Day labourer	300	yes	yes	yes	no	no	no	no	no	no	no	no	no	Yes	covered pit latrine	public tab	no	3	No	Yes	No	No	No	No	No	No	No	No	No	No	No	No	No	No	No	No	No	No	Yes	No	no	3
25	female	48	7	9	4	unemployed	unemployed	450	no	no	yes	no	no	no	no	no	no	no	no	no	No	covered pit latrine	piped in to dwelling	no	3	Yes	Yes	Yes	No	Yes	Yes	No	Yes	Yes	No	Yes	No	No	No	No	No	No	No	No	No	Yes	No	no	2
41	female	33	0	0	7	unemployed	Day labourer	600	no	no	no	no	no	no	no	no	no	no	no	no	No	No latrine	public tab	yes	4	No	Yes	Yes	Yes	No	No	Yes	Yes	No	No	No	No	No	No	No	No	No	No	No	No	Yes	No	no	2
30	female	56	0	4	8	day laborer	Government	600	no	no	yes	no	no	no	no	no	no	no	no	no	Yes	Open pit latrine	public tab	no	4	No	Yes	Yes	Yes	No	No	Yes	Yes	No	No	No	No	No	No	No	No	No	No	No	No	Yes	No	no	0
27	male	48	14	8	2	Government	#NULL!	600	yes	yes	yes	no	no	no	no	no	no	no	no	no	No	Open pit latrine	piped in to dwelling	no	4	Yes	Yes	Yes	No	No	No	Yes	No	Yes	Yes	No	No	No	No	No	No	Yes	No	No	No	Yes	No	no	0
30	male	24	0	8	6	unemployed	Day labourer	1000	yes	no	yes	yes	no	no	no	no	no	no	no	yes	Yes	covered pit latrine	piped in to dwelling	yes	3	No	Yes	Yes	Yes	No	No	Yes	Yes	Yes	Yes	No	Yes	No	No	No	No	No	No	No	Yes	Yes	No	no	3
24	female	25	4	7	5	unemployed	Farmer	1000	yes	yes	yes	yes	no	no	no	no	no	no	no	yes	Yes	Open pit latrine	public tab	yes	3	Yes	Yes	Yes	No	No	No	Yes	Yes	No	No	No	Yes	Yes	No	No	No	No	No	No	No	Yes	No	no	0
33	female	51	8	9	3	unemployed	Day labourer	1500	yes	yes	yes	no	no	no	no	no	no	no	no	yes	Yes	covered pit latrine	public tab	no	3	No	No	Yes	Yes	No	No	No	No	No	No	No	No	No	No	No	No	No	No	No	No	No	No	no	0
25	female	59	12	12	4	Government	Government	8000	yes	yes	yes	yes	no	yes	no	no	yes	no	no	yes	Yes	covered pit latrine	piped in to dwelling	no	3	Yes	Yes	Yes	Yes	Yes	No	Yes	Yes	Yes	Yes	No	No	Yes	Yes	Yes	No	Yes	No	No	Yes	Yes	No	no	2
28	female	36	11	13	3	Government	Government	3000	yes	yes	no	no	no	no	no	no	no	no	no	yes	No	Open pit latrine	public tanker	no	4	Yes	Yes	Yes	Yes	Yes	No	Yes	No	No	No	No	No	No	No	No	No	No	No	No	No	Yes	No	no	1
29	male	36	0	0	3	day laborer	Day labourer	1200	yes	no	no	no	no	no	no	no	no	no	no	no	No	Open pit latrine	public tab	no	3	No	Yes	No	Yes	No	No	Yes	No	No	No	No	No	No	No	No	No	No	No	No	No	Yes	No	no	2
30	female	59	0	0	6	day laborer	Day labourer	1400	yes	yes	yes	no	no	no	no	no	no	no	no	no	No	covered pit latrine	piped in to dwelling	no	4	No	No	Yes	Yes	No	No	Yes	Yes	Yes	No	No	No	No	No	No	No	No	No	No	No	Yes	No	no	0
28	female	33	15	15	7	Government	Government	4000	yes	yes	yes	yes	yes	yes	yes	no	yes	no	no	no	No	covered pit latrine	public tab	no	3	No	Yes	Yes	Yes	Yes	No	Yes	Yes	No	Yes	Yes	No	No	Yes	Yes	No	No	No	No	Yes	Yes	No	no	2
37	male	53	0	7	6	unemployed	Farmer	416	yes	yes	yes	yes	no	no	no	no	no	no	no	yes	Yes	covered pit latrine	public tab	no	4	No	Yes	Yes	Yes	No	No	Yes	Yes	No	Yes	Yes	No	No	No	No	No	No	No	No	No	Yes	No	no	4
42	female	36	0	0	9	unemployed	NGO	500	yes	yes	yes	no	no	no	no	no	no	no	no	yes	Yes	covered pit latrine	public tab	yes	3	No	Yes	Yes	Yes	No	No	Yes	No	No	No	No	No	No	No	No	No	Yes	No	No	No	Yes	No	no	1
26	female	38	0	0	5	day laborer	Day labourer	2200	no	no	no	no	no	no	no	no	no	no	yes	no	Yes	covered pit latrine	public tab	no	4	No	Yes	Yes	Yes	No	No	Yes	No	No	Yes	Yes	No	No	No	No	No	Yes	No	No	No	Yes	No	no	3
25	female	24	7	9	5	Murchant	Murchant	3000	yes	yes	yes	yes	no	no	no	no	no	no	no	no	Yes	covered pit latrine	public tab	no	2	No	Yes	No	No	No	No	No	No	No	No	No	No	Yes	No	No	No	No	No	No	No	Yes	No	no	0
28	male	48	10	15	4	unemployed	Government	1000	no	no	no	no	no	no	no	no	no	no	no	no	No	Open pit latrine	public tanker	no	3	No	Yes	Yes	Yes	Yes	No	Yes	No	No	No	Yes	No	No	No	No	No	No	No	No	Yes	Yes	No	no	0
25	male	25	8	15	7	day laborer	Government	1200	yes	no	yes	yes	no	yes	no	no	no	no	no	yes	Yes	Open pit latrine	piped in to dwelling	no	3	No	Yes	Yes	Yes	No	No	Yes	No	No	No	Yes	No	No	No	No	No	No	No	No	Yes	Yes	No	no	0
29	male	48	5	8	4	unemployed	unemployed	0	yes	no	yes	yes	no	no	no	no	yes	no	no	yes	No	covered pit latrine	piped in to dwelling	no	3	No	Yes	No	No	No	No	Yes	Yes	No	No	No	No	No	No	No	No	No	No	No	No	Yes	No	no	3
25	male	46	6	8	3	unemployed	Day labourer	1500	yes	yes	yes	no	no	no	no	no	no	no	no	yes	No	covered pit latrine	piped in to dwelling	no	3	No	Yes	Yes	Yes	No	No	Yes	No	No	No	No	No	No	No	No	No	No	No	No	No	Yes	No	no	4
27	female	36	0	9	2	day laborer	Murchant	100	yes	no	no	no	no	no	no	no	no	no	no	no	No	Open pit latrine	public tab	yes	3	No	Yes	Yes	No	Yes	No	Yes	No	No	No	No	No	Yes	Yes	Yes	No	No	No	No	No	Yes	No	no	0
27	female	21	13	13	4	unemployed	Government	3800	yes	yes	yes	no	no	yes	no	no	no	no	no	yes	No	Open pit latrine	public tab	yes	3	No	Yes	No	Yes	No	No	Yes	Yes	Yes	No	Yes	Yes	Yes	Yes	No	No	Yes	No	No	No	No	No	no	0
[truncated: 72 more columns]
