# Supplementary material for: Iron deficiency anemia among children aged 2–5 years in southern Ethiopia: a community-based cross-sectional study
Source: PeerJ journal article supplement (doi:10.7717/peerj.11649), 2021-06-28
Supplement: Supplemental_Figure_S1.pdf [file Supplemental_Figure_S1.pdf]

Households in census = 3,900  
Total population = 23,010  
Children 2-5 age= 1689

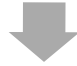

Number of children randomly selected  
using SPSS = 340

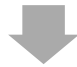

Number of refusal=9  
Number tested for haemoglobin and assessed for anthropometric and  
sociodemographic data, household food diversity, and food security =  
331

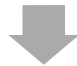

Children with haemoglobin <11 mg/dl who were tested for ferritin and  
C-reactive protein = 107
