# Supplementary material for: Iron deficiency anemia among children aged 2–5 years in southern Ethiopia: a community-based cross-sectional study
Source: PeerJ journal article supplement (doi:10.7717/peerj.11649), 2021-06-28

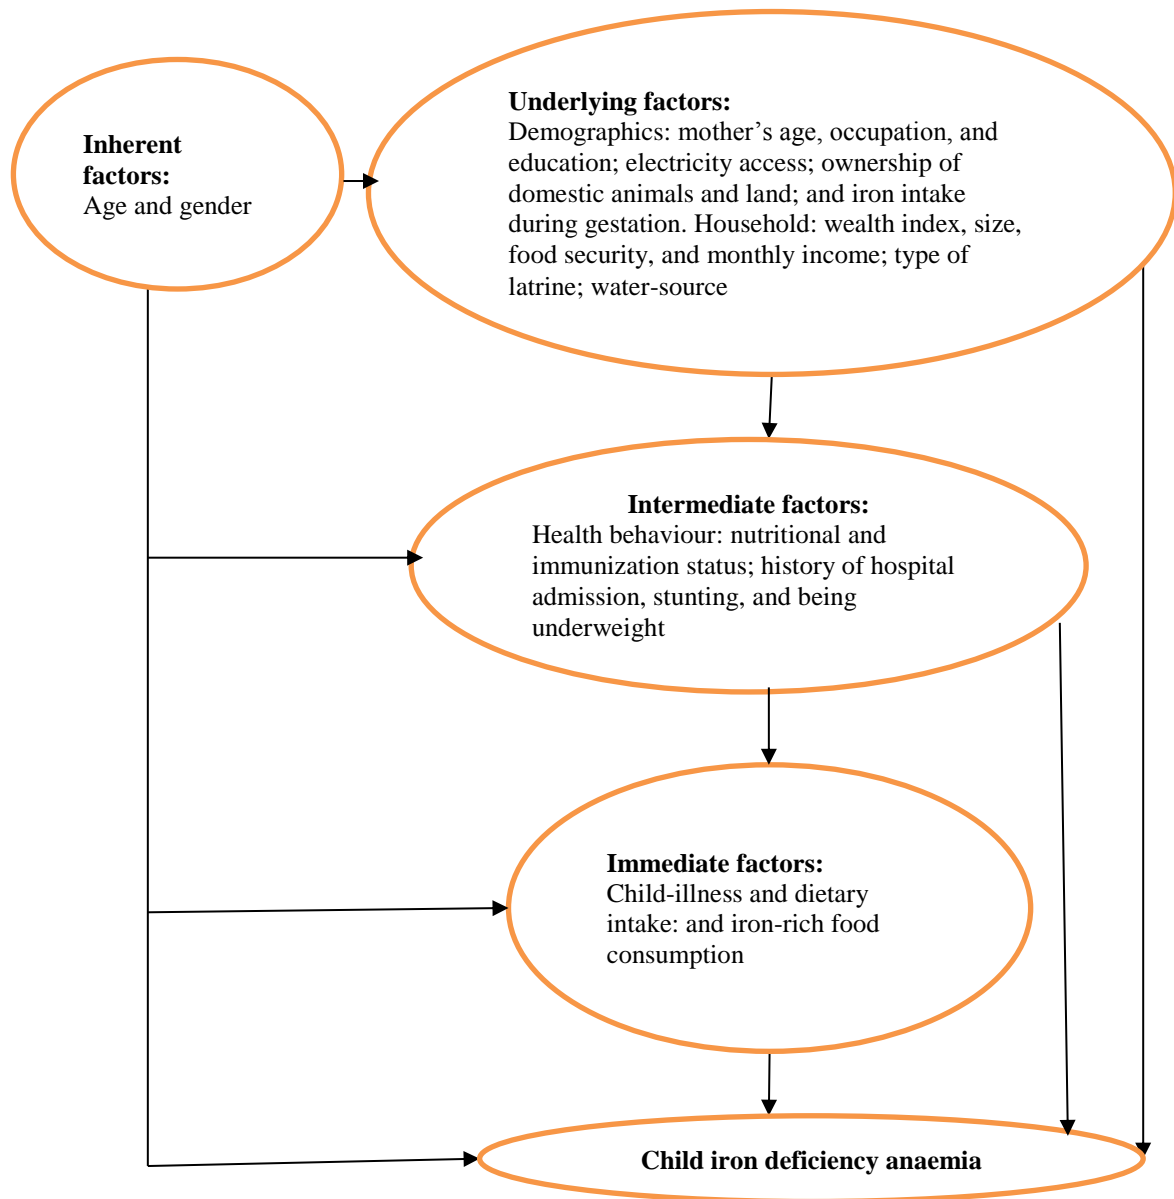

Supplement: Supplemental_FIgure_S2.pdf [file Supplemental_FIgure_S2.pdf]
