# Supplementary material for: Iron deficiency anemia among children aged 2–5 years in southern Ethiopia: a community-based cross-sectional study
Source: PeerJ journal article supplement (doi:10.7717/peerj.11649), 2021-06-28
Supplement: Supplemental_Table_S3.pdf [file Supplemental_Table_S3.pdf]

| Characteristics                           | Iron rich food consumption at list one time with in the last 7 days |           | Crude OR (95%CI) | Adjusted OR (95%CI) |
|-------------------------------------------|---------------------------------------------------------------------|-----------|------------------|---------------------|
|                                           | No                                                                  | Yes       |                  |                     |
|                                           | Child sex                                                           |           |                  |                     |
| Male                                      | 120 (52.9)                                                          | 52 (50.0) | 1                | 1                   |
| Female                                    | 107 (47.1)                                                          | 52 (50.5) | 0.89 (0.56-1.42) | 0.93 (0.55-1.56)    |
| Child age in month                        |                                                                     |           | 1.01 (0.99-1.03) | 1.01 (0.99-1.04)    |
| Household dietary diversity (continuous)  |                                                                     |           | 1.53 (1.33-1.76) | 1.44 (1.23-1.67)    |
| Meal frequency per day (continuous)       |                                                                     |           | 1.57 (1.13-2.19) | 1.27 (0.88-1.83)    |
| Mother school attended years (continuous) |                                                                     |           | 1.14 (1.07-1.20) | 1.13 (1.03-1.24)    |
| Father school attended years (continuous) |                                                                     |           | 1.07 (1.02-1.14) | 0.93 (0.85-1.02)    |
